# Supplementary material for: Cross-tissue transcriptome-wide association studies of 885,176 individuals and seven diseases of the gut-brain axis identify susceptibility genes shared between schizophrenia and inflammatory bowel disease
Source: Research Square preprint supplement (doi:10.21203/rs.3.rs-590423/v1), 2021-07-15
Supplement: Supplementary file 1 [file 1dc0cc44f06f7f0ff649e8aa.xlsx]

## Sheet: Position of known GWAS loci
Trait	CHR	position of lead SNP GRCh37	left locus boundary	right locus boundary
ADHD	1	44184192	43944476	44486239
ADHD	1	96602440	96350922	96854347
ADHD	2	215181889	215068525	215384734
ADHD	3	20669071	20478573	20754168
ADHD	4	31151456	31028190	31206164
ADHD	5	87854395	87377102	88069593
ADHD	7	114086133	113713639	114290213
ADHD	8	34352610	33980998	34687499
ADHD	10	106747354	106403209	107039932
ADHD	12	89760744	89713470	89824040
ADHD	15	47754018	47685504	47973695
ADHD	16	72578131	72039605	72916373
BD	1	150138699	149909495	150527354
BD	2	97376407	96393407	97866928
BD	2	166152389	166036563	166321848
BD	2	194465711	193672550	194965371
BD	3	36856030	36832273	37057385
BD	3	52814256	52268866	53164193
BD	3	107793709	107729547	108045798
BD	4	162294038	162238452	162411391
BD	5	7587236	7527521	7665637
BD	5	80796368	80657729	81061504
BD	6	72519394	72450580	72602564
BD	6	98591622	98257965	98895069
BD	6	166995260	166922813	167027289
BD	7	11871787	11853008	12028675
BD	7	105048158	104467609	105112489
BD	7	140700006	140323822	140916844
BD	10	62125856	61958620	62435480
BD	10	111745562	111380443	111938114
BD	11	61591907	61514085	61685989
BD	11	65945186	65696831	66153918
BD	11	66662731	66070146	66837635
BD	11	70517927	70458848	70623065
BD	12	2387099	2280807	2421588
BD	15	42904904	42437711	43541939
BD	15	85357857	84647358	85452729
BD	16	9926966	9799707	10075540
BD	17	42201041	42018541	42341305
BD	18	60243876	60123742	60276850
BD	19	19358207	19293003	19852058
BD	20	43682549	43567234	43923102
CD	1	1247494	1143657	1425412
CD	1	8022197	7913430	8200578
CD	1	20171860	20147302	20250378
CD	1	22702231	22666980	22738432
CD	1	63049593	62848090	63365651
CD	1	67652984	67593819	67767993
CD	1	67681669	67594559	67767993
CD	1	67708155	67594559	67767993
CD	1	70995562	70989157	71116437
CD	1	78623626	78022217	78816915
CD	1	92554283	92252015	93142561
CD	1	101466054	101209653	101678531
CD	1	114303808	113861554	114544436
CD	1	120437884	120347430	120645927
CD	1	151801680	151564787	151929022
CD	1	155878732	155030557	156092991
CD	1	160856964	160702791	160933065
CD	1	161479745	161378897	161548037
CD	1	169519049	169240738	169523537
CD	1	172853460	172650685	172935443
CD	1	186875459	186809577	186968927
CD	1	197631141	197310096	197937674
CD	1	198598663	198540028	198805839
CD	1	200101920	200029663	200137649
CD	1	200877562	200664589	201036407
CD	1	206939904	206817271	207013177
CD	2	25097644	24687351	25460003
CD	2	27730940	27345484	28319242
CD	2	28614794	28599102	28671510
CD	2	43806918	43448519	43935446
CD	2	61204856	60914729	61874015
CD	2	62551472	62489753	62634579
CD	2	65667272	65529288	65717094
CD	2	102662888	102300824	102709117
CD	2	103063369	102841715	103203126
CD	2	145492382	145303576	145753166
CD	2	160794008	160351267	161076301
CD	2	163110536	162960873	163356394
CD	2	191931464	191871287	192002538
CD	2	204592021	204444331	204777404
CD	2	219151218	218939630	219259270
CD	2	228660112	228611104	228677003
CD	2	231097129	231045388	231247873
CD	2	234173503	234139467	234492273
CD	2	241569692	241558936	241655544
CD	2	242737341	242522140	243090997
CD	3	18767404	18607792	18882488
CD	3	46457412	46145295	46649700
CD	3	48681053	48525955	50267837
CD	3	48731487	48528850	50402309
CD	3	49228501	48528850	50455867
CD	3	49721532	48528850	51063622
CD	3	141105570	141020528	141341000
CD	4	3444503	3380080	3536002
CD	4	26132361	26068018	26182139
CD	4	38325036	38287192	38381863
CD	4	48363245	48186152	52969153
CD	4	74856535	74689702	74990228
CD	4	102865304	102701345	103105685
CD	4	123161619	122935327	123564119
CD	5	10695526	10667441	10832271
CD	5	38867732	38800374	39031577
CD	5	40237018	40176538	40319130
CD	5	40410584	40286679	40950808
CD	5	40498577	40286967	40955561
CD	5	55438851	55417599	55455645
CD	5	71693899	71475851	71902975
CD	5	72518148	72422018	72579043
CD	5	96252803	96110582	96476135
CD	5	130104076	129532007	130380598
CD	5	130613600	130375578	131410680
CD	5	131778452	131548938	131878127
CD	5	134443606	134382830	134488349
CD	5	141513204	141412629	141641922
CD	5	150277909	150043046	150391472
CD	5	158787385	158522577	158826310
CD	5	158820844	158523522	158826792
CD	5	158827769	158822645	158867212
CD	5	172324978	172306540	172365059
CD	5	173318254	173237531	173539334
CD	5	176788570	176734150	176852255
CD	6	382559	375936	445278
CD	6	3420406	3411426	3469853
CD	6	14719496	14680527	14730536
CD	6	20728731	20529542	20844741
CD	6	20812588	20686573	20997369
CD	6	21430730	21360806	21473580
CD	6	31274380	31221698	31360095
CD	6	32626272	32421798	32724719
CD	6	90973159	90802410	91038726
CD	6	106435269	106396774	106535256
CD	6	111848191	111393777	111968245
CD	6	127457260	127096527	127542953
CD	6	128245765	127951512	128339840
CD	6	138006504	137922039	138139694
CD	6	143898894	143834669	144020842
CD	6	149577079	149502270	149632522
CD	6	159490436	159340625	159541830
CD	6	167373547	167344898	167543084
CD	7	2869985	2734764	2931236
CD	7	26892440	26657897	27189195
CD	7	28180556	28122977	28260312
CD	7	50175654	49879539	50249013
CD	7	50304461	50245295	50364626
CD	7	98759117	98716813	98930036
CD	7	100423365	100192117	100552644
CD	7	148220448	148182172	148283313
CD	8	27227554	27064132	27334969
CD	8	49129242	48909724	49589479
CD	8	90875918	90640722	91129715
CD	8	126534671	126462852	126569596
CD	8	129567181	129473012	129600202
CD	8	130604563	130480381	130695036
CD	9	4981602	4877246	5273896
CD	9	93928416	93893941	94152997
CD	9	117553249	117424855	117699745
CD	9	117605070	117440143	117699745
CD	9	117643362	117465695	117699786
CD	9	139266405	139134981	139418260
CD	9	139399641	139134981	139431057
CD	10	6081230	6028491	6128314
CD	10	30728101	30686036	30807686
CD	10	35295431	35183167	35723388
CD	10	59947231	59890827	60139066
CD	10	64369749	64302195	64447352
CD	10	64445564	64362223	64601435
CD	10	64541319	64380336	64721524
CD	10	75669190	75395642	75705229
CD	10	81032532	80996843	81072523
CD	10	82250831	82062661	82364513
CD	10	94464307	94195408	94501903
CD	10	101284237	101267077	101339345
CD	10	104232716	104207799	104806884
CD	11	1874072	1861912	1976306
CD	11	58408687	57915680	58457495
CD	11	60776209	60723207	60836117
CD	11	61552680	61505583	61684550
CD	11	64150370	63853216	64310787
CD	11	65653242	65366192	65781195
CD	11	76299194	76032079	76339194
CD	11	87091845	86822077	87189422
CD	11	118759610	118587349	118898319
CD	12	6491125	6480426	6538968
CD	12	40528432	40300012	40750195
CD	12	40756472	40532533	41017908
CD	12	68499986	68429119	68510072
CD	12	112007756	111704439	113030487
CD	12	120146925	120008093	120337271
CD	13	40695992	40562784	40724077
CD	13	40833012	40763802	40861667
CD	13	41013977	41003022	41054629
CD	13	43018030	42834735	43101763
CD	13	44457925	44239557	44636380
CD	13	99907341	99763001	100073107
CD	14	69273905	69170351	69329839
CD	14	75741751	75698304	75749875
CD	14	88472595	88250257	88642303
CD	15	38899190	38814377	38967537
CD	15	67442596	67411401	67482368
CD	15	91181489	90995471	91243791
CD	16	11373405	11315655	11469127
CD	16	11704651	11673488	11757559
CD	16	23864590	23732006	23970566
CD	16	28517709	28290927	29023105
CD	16	50745926	50692364	50846162
CD	16	50756540	50692364	50846162
CD	16	50763781	50692364	50846162
CD	16	86009686	85983056	86031452
CD	17	25843643	25675350	25990033
CD	17	32593665	32499059	32679760
CD	17	37912377	37382674	38191924
CD	17	40527544	40384466	40926695
CD	17	54880993	54834041	54950082
CD	17	57963537	57488579	58117429
CD	17	70642923	70590522	70648428
CD	18	12809340	12738413	12923822
CD	18	46395022	46353585	46457096
CD	18	56879827	56864391	56942671
CD	18	67530439	67480632	67569547
CD	18	77220616	77165991	77288532
CD	19	1124031	1090803	1175396
CD	19	10469975	10406635	10625796
CD	19	10512911	10412518	10625796
CD	19	33731551	33706293	33757062
CD	19	46849806	46788020	46925425
CD	19	49206172	49092430	49278082
CD	19	55380214	55326739	55420801
CD	20	30849517	30630042	31189726
CD	20	31349908	31201111	31577051
CD	20	33799280	32961547	34224348
CD	20	44740196	44581453	44784336
CD	20	48955424	48930661	49041786
CD	20	57824309	57730566	57873938
CD	20	62348907	62200860	62401115
CD	21	16817938	16698439	16843298
CD	21	34776695	34664590	35210184
CD	21	40465534	40450830	40483777
CD	21	45615741	45598522	45688215
CD	22	21925017	21811991	22076405
CD	22	30493882	30106659	30661184
CD	22	39659773	39649134	39758253
CD	22	39721745	39649134	39759627
CD	22	41867377	41381251	42365073
MDD	1	8504421	8370088	8962827
MDD	1	72813218	72508345	73064758
MDD	1	73768366	73295603	74174778
MDD	1	80799329	80780823	80877080
MDD	1	90796053	90655967	91014198
MDD	1	197754741	197310096	197937674
MDD	2	57987593	57937744	58482646
MDD	2	157111313	156926985	157526167
MDD	3	44287760	44140024	44913713
MDD	3	158107180	157579641	158567979
MDD	4	42047778	41824126	42190381
MDD	5	87992715	87781168	88205996
MDD	5	103942055	103669502	104123360
MDD	5	124251883	124112802	124336747
MDD	5	164523472	164303757	164783822
MDD	5	166992078	166894448	167058302
MDD	6	30737591	30345428	30799043
MDD	6	99566521	99284532	99673152
MDD	7	12264871	12172142	12465595
MDD	7	109105611	108865464	109228343
MDD	9	2983774	2931341	3013123
MDD	9	11544964	11254070	11850283
MDD	9	119733595	119639475	119807198
MDD	9	126682068	126188639	126767232
MDD	10	106563924	106340455	106896786
MDD	11	31850105	31039902	31923315
MDD	12	23947737	23917943	24006406
MDD	13	44327799	44144819	44489602
MDD	13	53625781	53602122	53938206
MDD	14	42179732	41928066	42466574
MDD	14	64686207	64563613	64884106
MDD	14	75356855	75017379	75676634
MDD	14	104017953	103811249	104501925
MDD	15	37648402	37563873	37890727
MDD	16	6310645	6264037	6347598
MDD	16	7666402	7636423	7688490
MDD	16	13066833	13018639	13120841
MDD	16	72214276	71736359	72853368
MDD	17	27576962	27353069	27889578
MDD	18	36883737	36503359	36979153
MDD	18	50614732	50396584	50924120
MDD	18	52517906	52365914	52713131
MDD	18	53101598	52838987	53213887
MDD	22	41617897	41075695	42283709
PSC	1	2526746	2404256	2779043
PSC	2	111933001	111850515	112037967
PSC	2	204612058	204445827	204788156
PSC	2	228660112	228611104	228677003
PSC	2	241569692	241558936	241655544
PSC	3	49721532	48528850	51063622
PSC	3	71153890	71023071	71218130
PSC	4	103432974	103388565	103977938
PSC	4	123499745	122935327	123564119
PSC	6	31348365	31271630	31435991
PSC	6	91030441	90920185	91092352
PSC	10	6108439	6029797	6133758
PSC	11	64107735	63845355	64289760
PSC	11	111579939	111319729	111986490
PSC	12	48208368	48132451	48231898
PSC	12	107198611	106958055	107524506
PSC	12	111884608	111702182	113030487
PSC	16	11169683	11016597	11296670
PSC	18	53207207	53099093	53480206
PSC	18	67543688	67482331	67569547
PSC	19	47205707	47151378	47300135
PSC	21	40466744	40450830	40483777
PSC	21	43855067	43809494	43896583
SCZ	1	2387101	2359981	2406366
SCZ	1	8424985	8367704	8951506
SCZ	1	30437268	30402546	30525355
SCZ	1	44097530	43776693	44486239
SCZ	1	66324512	66213043	66554145
SCZ	1	73768366	73295603	74174778
SCZ	1	95840866	95731003	96039899
SCZ	1	97878068	97724009	97949431
SCZ	1	98512127	98204303	98662961
SCZ	1	150031490	149887684	150521026
SCZ	1	174015259	173378377	175090094
SCZ	1	177309490	177156527	177433216
SCZ	1	190643601	190377757	190874331
SCZ	1	190949551	190690842	191419223
SCZ	1	200266503	200163003	200464213
SCZ	1	239210058	238931277	239250028
SCZ	1	243555219	243135255	243706224
SCZ	1	243663893	243514064	244080080
SCZ	2	22749726	22547633	22971771
SCZ	2	58138192	57937744	58541238
SCZ	2	58383820	57941535	58719393
SCZ	2	58064341	57937744	58486224
SCZ	2	73161551	72449443	73183997
SCZ	2	73623439	73526909	74103186
SCZ	2	145141541	144940576	145221590
SCZ	2	146436222	146260821	146597420
SCZ	2	185640728	185305804	186211841
SCZ	2	198304577	198142210	198954774
SCZ	2	199990107	199663258	200508819
SCZ	2	200244409	199683176	200508819
SCZ	2	200576767	200508998	201083598
SCZ	2	200715388	200530580	201254171
SCZ	2	200768454	200530917	201254171
SCZ	2	201297861	201048448	201356309
SCZ	2	225391296	225186069	225719693
SCZ	2	233562197	233546985	233815915
SCZ	3	2521322	2427611	2566831
SCZ	3	10804551	10780100	10881159
SCZ	3	16846967	16704245	16973705
SCZ	3	17887635	17339713	18144922
SCZ	3	36858583	36832273	37152715
SCZ	3	53175017	53108776	53261923
SCZ	3	53515136	53247930	53598080
SCZ	3	60287845	60235846	60305117
SCZ	3	63867355	63667662	64097705
SCZ	3	71543758	71423028	71680689
SCZ	3	136288405	135607907	136841449
SCZ	3	161470592	161137465	161556214
SCZ	3	180623255	180438462	181208277
SCZ	3	181051857	180521624	181259780
SCZ	4	23423603	23293821	23485012
SCZ	4	103188709	103111761	103235640
SCZ	4	143829759	143477464	144339878
SCZ	4	170626552	170266714	170680194
SCZ	4	176731401	176682583	176817023
SCZ	4	176855221	176817396	176973921
SCZ	5	45285752	44394547	50074719
SCZ	5	49840113	44920995	50163085
SCZ	5	60620980	60001644	60882079
SCZ	5	88000630	87781168	88206628
SCZ	5	88746331	88421581	88889955
SCZ	5	137855305	137234814	137965228
SCZ	5	151993104	151846830	152362167
SCZ	5	152177121	151886147	152366186
SCZ	5	152540354	152360703	152786520
SCZ	5	152797656	152588216	152897407
SCZ	6	29206683	28514583	29398815
SCZ	6	73155701	72815886	73172623
SCZ	6	83789798	83574391	83968946
SCZ	6	84407466	84015983	84668624
SCZ	6	93077500	92904684	93266194
SCZ	6	114719447	114553698	115003921
SCZ	6	128329494	128138976	128339840
SCZ	6	143650826	143535130	143721211
SCZ	7	2025096	1849856	2284532
SCZ	7	24777090	24524095	24878110
SCZ	7	86775501	86594580	86995922
SCZ	7	86427626	86191088	86678160
SCZ	7	104927586	104451946	105110990
SCZ	7	110048893	109923665	110282027
SCZ	7	110976264	110483836	111371975
SCZ	7	131567263	131467527	131632967
SCZ	7	131619693	131468065	131634425
SCZ	7	137074844	136978885	137138736
SCZ	8	4180611	4165205	4211747
SCZ	8	10032894	9892835	10104092
SCZ	8	18421474	18332245	18435580
SCZ	8	26269191	26081505	26307386
SCZ	8	27328021	27118605	27405616
SCZ	8	27425349	27404354	27474202
SCZ	8	34312412	33980998	34683193
SCZ	8	38209129	38011182	38368270
SCZ	8	60696526	60471826	60969652
SCZ	8	89264751	89084837	89751478
SCZ	8	111472014	111225164	112021630
SCZ	8	143320141	143263609	143522536
SCZ	8	143343398	143281514	143540337
SCZ	8	143293307	143252184	143350197
SCZ	9	84736303	84461318	85135915
SCZ	9	101071090	100985388	101083523
SCZ	10	18549016	18533653	18631445
SCZ	10	18745105	18643581	18937722
SCZ	10	104928914	104380686	105245943
SCZ	10	104649375	104217415	105244231
SCZ	11	24406419	24217624	24548406
SCZ	11	30378559	30057606	30543029
SCZ	11	46373311	46274143	47456202
SCZ	11	57484660	57213061	57988674
SCZ	11	65383755	65135413	65663239
SCZ	11	113392994	113286878	113451959
SCZ	11	113431960	113316236	113692660
SCZ	11	124612932	124494676	124680673
SCZ	11	130811356	130704509	130895530
SCZ	11	132397822	132386285	132502438
SCZ	11	132568255	132491939	132585182
SCZ	11	133852684	133777388	133874656
SCZ	11	134296384	134253229	134315499
SCZ	12	2344960	2268143	2420377
SCZ	12	2514112	2463054	2532167
SCZ	12	23633432	23206457	23659664
SCZ	12	39522907	39006665	40015286
SCZ	12	57490100	57311229	57540751
SCZ	12	57682956	57535266	57976647
SCZ	12	92246786	92236186	92377558
SCZ	12	103361112	103326468	103388218
SCZ	12	110723245	110246457	111300010
SCZ	12	123665113	123385443	123913697
SCZ	13	79859456	79805433	80257200
SCZ	14	29469373	29226194	29700970
SCZ	14	30000405	29995029	30149524
SCZ	14	30189985	30020939	30353460
SCZ	14	33298732	33246097	33368366
SCZ	14	59981768	59655461	60174509
SCZ	14	72417326	72295512	72497424
SCZ	14	99712032	99652561	99735233
SCZ	14	104495116	104016066	104571054
SCZ	14	104314182	103816225	104546893
SCZ	15	40566759	40549617	40635177
SCZ	15	47686081	47610071	47817840
SCZ	15	61854003	61805497	61911182
SCZ	15	70589272	70500600	70670286
SCZ	15	78894759	78709937	79019024
SCZ	15	83254708	82391756	83678394
SCZ	15	85207825	84633492	85447060
SCZ	15	91416550	91392987	91537724
SCZ	16	7744180	7734494	7772456
SCZ	16	9900057	9799012	10067543
SCZ	16	13749265	13640858	13808317
SCZ	16	24240725	24172040	24309108
SCZ	16	29966277	29905882	30493733
SCZ	16	58545426	58521090	58734207
SCZ	16	63712719	63603581	63817157
SCZ	16	68285847	67131601	68429894
SCZ	16	71359066	71141408	71813751
SCZ	17	2156453	1926482	2298974
SCZ	17	17711270	17433959	18041507
SCZ	17	19014831	18909043	19476588
SCZ	17	78561603	78438721	78761389
SCZ	18	53009097	52821633	53183396
SCZ	18	52749217	52706707	52828885
SCZ	18	53554733	53379992	53693949
SCZ	18	53408187	53153117	53628827
SCZ	18	53230650	53101170	53480206
SCZ	18	53775254	53763577	53854465
SCZ	18	77575613	77545200	77720079
SCZ	19	11849736	11847615	11995508
SCZ	19	19484295	19293003	19854456
SCZ	19	30987423	30969282	31077232
SCZ	19	50152142	49969085	50214868
SCZ	20	20821005	20805391	20952768
SCZ	20	37453194	37306914	37534369
SCZ	22	39840130	39745639	39941406
SCZ	22	39967430	39859169	40057273
SCZ	22	40068051	39967785	40098844
SCZ	22	41587556	41075543	42280618
SCZ	22	42340508	41757647	42563308
SCZ	22	42603814	42343091	42722518
UC	1	1247494	1143657	1425412
UC	1	2502780	2404256	2779043
UC	1	8022197	7913430	8200578
UC	1	20135822	20060965	20140036
UC	1	20142866	20138436	20148249
UC	1	20171860	20147302	20250378
UC	1	22702231	22666980	22738432
UC	1	67652984	67593819	67767993
UC	1	67681669	67594559	67767993
UC	1	67708155	67594559	67767993
UC	1	70995562	70989157	71116437
UC	1	92554283	92252015	93142561
UC	1	101466054	101209653	101678531
UC	1	114303808	113861554	114544436
UC	1	151801680	151564787	151929022
UC	1	160856964	160702791	160933065
UC	1	161479745	161378897	161548037
UC	1	169519049	169240738	169523537
UC	1	186875459	186809577	186968927
UC	1	197631141	197310096	197937674
UC	1	198598663	198540028	198805839
UC	1	200101920	200029663	200137649
UC	1	200877562	200664589	201036407
UC	1	206939904	206817271	207013177
UC	2	25097644	24687351	25460003
UC	2	28614794	28599102	28671510
UC	2	43806918	43448519	43935446
UC	2	61204856	60914729	61874015
UC	2	65667272	65529288	65717094
UC	2	102662888	102300824	102709117
UC	2	103063369	102841715	103203126
UC	2	160794008	160351267	161076301
UC	2	163110536	162960873	163356394
UC	2	191931464	191871287	192002538
UC	2	198871417	198142210	198961065
UC	2	199523122	199355387	199657020
UC	2	199745018	199657020	200438368
UC	2	204592021	204444331	204777404
UC	2	219151218	218939630	219259270
UC	2	228660112	228611104	228677003
UC	2	234173503	234139467	234492273
UC	2	241569692	241558936	241655544
UC	2	241586810	241559339	241661112
UC	2	242737341	242522140	243090997
UC	3	46457412	46145295	46649700
UC	3	48681053	48525955	50267837
UC	3	48731487	48528850	50402309
UC	3	49721532	48528850	51063622
UC	3	53062661	52482851	53175017
UC	3	101569726	100886622	101671755
UC	4	3444503	3380080	3536002
UC	4	26132361	26068018	26182139
UC	4	38325036	38287192	38381863
UC	4	74856535	74689702	74990228
UC	4	103434253	103388565	103977938
UC	4	106075498	105937236	106418770
UC	4	123161619	122935327	123564119
UC	5	594083	480509	718021
UC	5	10695526	10667441	10832271
UC	5	38867732	38800374	39031577
UC	5	40237018	40176538	40319130
UC	5	40410584	40286679	40950808
UC	5	40498577	40286967	40955561
UC	5	55438851	55417599	55455645
UC	5	71693899	71475851	71902975
UC	5	96252803	96110582	96476135
UC	5	130104076	129532007	130380598
UC	5	130613600	130375578	131410680
UC	5	131778452	131548938	131878127
UC	5	134443606	134382830	134488349
UC	5	141513204	141412629	141641922
UC	5	150277909	150043046	150391472
UC	5	158787385	158522577	158826310
UC	5	158820844	158523522	158826792
UC	5	158827769	158822645	158867212
UC	5	172324978	172306540	172365059
UC	5	173318254	173237531	173539334
UC	5	176788570	176734150	176852255
UC	6	382559	375936	445278
UC	6	3420406	3411426	3469853
UC	6	14719496	14680527	14730536
UC	6	20728731	20529542	20844741
UC	6	32626272	32421798	32724719
UC	6	90973159	90802410	91038726
UC	6	106435269	106396774	106535256
UC	6	111848191	111393777	111968245
UC	6	138006504	137922039	138139694
UC	6	143898894	143834669	144020842
UC	6	149577079	149502270	149632522
UC	6	167373547	167344898	167543084
UC	7	2869985	2734764	2931236
UC	7	17442679	17277084	17522503
UC	7	27231762	27205282	27315376
UC	7	50175654	49879539	50249013
UC	7	50304461	50245295	50364626
UC	7	98759117	98716813	98930036
UC	7	100423365	100192117	100552644
UC	7	107450033	107420354	107476233
UC	7	107480315	107458929	107573961
UC	7	116895163	116874471	117107284
UC	7	128573967	128551740	128777520
UC	7	148220448	148182172	148283313
UC	8	27227554	27064132	27334969
UC	8	49129242	48909724	49589479
UC	8	90875918	90640722	91129715
UC	8	126534671	126462852	126569596
UC	8	129567181	129473012	129600202
UC	8	130604563	130480381	130695036
UC	9	4981602	4877246	5273896
UC	9	93928416	93893941	94152997
UC	9	117553249	117424855	117699745
UC	9	117605070	117440143	117699745
UC	9	117643362	117465695	117699786
UC	9	139266405	139134981	139418260
UC	9	139399641	139134981	139431057
UC	10	6081230	6028491	6128314
UC	10	30728101	30686036	30807686
UC	10	35295431	35183167	35723388
UC	10	59947231	59890827	60139066
UC	10	64369749	64302195	64447352
UC	10	64445564	64362223	64601435
UC	10	64541319	64380336	64721524
UC	10	75669190	75395642	75705229
UC	10	81032532	80996843	81072523
UC	10	82250831	82062661	82364513
UC	10	94464307	94195408	94501903
UC	10	101284237	101267077	101339345
UC	10	104232716	104207799	104806884
UC	11	1874072	1861912	1976306
UC	11	58408687	57915680	58457495
UC	11	60776209	60723207	60836117
UC	11	61552680	61505583	61684550
UC	11	64150370	63853216	64310787
UC	11	76299194	76032079	76339194
UC	11	87091845	86822077	87189422
UC	11	96023427	95978812	96226432
UC	11	114386830	114256749	114535196
UC	12	12648843	12537072	12720105
UC	12	40528432	40300012	40750195
UC	12	40756472	40532533	41017908
UC	12	48208368	48132451	48231898
UC	12	68499986	68429119	68510072
UC	12	112007756	111704439	113030487
UC	12	120146925	120008093	120337271
UC	13	27531267	27492468	27564279
UC	13	40695992	40562784	40724077
UC	13	40833012	40763802	40861667
UC	13	41013977	41003022	41054629
UC	13	44457925	44239557	44636380
UC	13	99907341	99763001	100073107
UC	14	69273905	69170351	69329839
UC	14	75741751	75698304	75749875
UC	14	88472595	88250257	88642303
UC	15	38899190	38814377	38967537
UC	15	41563950	41227050	41878208
UC	15	67442596	67411401	67482368
UC	15	91181489	90995471	91243791
UC	16	11704651	11673488	11757559
UC	16	23864590	23732006	23970566
UC	16	28517709	28290927	29023105
UC	16	30482494	29922011	30895545
UC	16	50763781	50692364	50846162
UC	16	68591230	68429894	68834156
UC	16	86009686	85983056	86031452
UC	17	32593665	32499059	32679760
UC	17	37912377	37382674	38191924
UC	17	40527544	40384466	40926695
UC	17	54880993	54834041	54950082
UC	17	57963537	57488579	58117429
UC	17	70642923	70590522	70648428
UC	17	76737118	76634713	76864175
UC	18	12809340	12738413	12923822
UC	18	46395022	46353585	46457096
UC	18	67530439	67480632	67569547
UC	18	77220616	77165991	77288532
UC	19	1124031	1090803	1175396
UC	19	10469975	10406635	10625796
UC	19	10512911	10412518	10625796
UC	19	33731551	33706293	33757062
UC	19	47119910	47047284	47146969
UC	19	55380214	55326739	55420801
UC	20	30849517	30630042	31189726
UC	20	31349908	31201111	31577051
UC	20	33799280	32961547	34224348
UC	20	43068996	43059437	43262827
UC	20	44740196	44581453	44784336
UC	20	48955424	48930661	49041786
UC	20	57824309	57730566	57873938
UC	20	62348907	62200860	62401115
UC	21	16817938	16698439	16843298
UC	21	40465534	40450830	40483777
UC	21	45615741	45598522	45688215
UC	22	21925017	21811991	22076405
UC	22	30493882	30106659	30661184
UC	22	39659773	39649134	39758253
UC	22	39721745	39649134	39759627

## Sheet: Genes in known GWAS loci
Disease	Crohn’s disease (CD)	Ulcerative colitis (UC)	Primary Sclerosing Cholangitis (PSC)	Schizophrenia (SCZ)	Major depressive disorder (MDD)	Bipolar disorder (BD)	Attention deficit/hyperactivity disorder (ADHD)
Study (PMID)	26192919	26192919	23603763, 26974007, 27992413	29483656	29700475	31043756	30478444
Genes	AAMP	AAMP	ACAD10	ABCB9	ABCF1	ACOT12	ARTN
	ABHD1	AC016747.3	ACOXL	ABCD2	ABHD15	ADAMTSL3	ATP6V0B
	AC016747.3	AC034220.3	ADAD1	ACD	ACO2	ADAMTSL4	B4GALT2
	AC034220.3	AC093642.3	ADAM1A	ACO2	ACYP1	ADCK2	CCDC24
	AC093642.3	ACAD10	ALDH2	ACP2	AP1G1	ADCY2	DHODH
	ACAD10	ACAP3	ALG9	ACTR1A	APOPT1	ADD3	DHX38
	ACAP3	ACHE	AMIGO3	ACTR5	AREL1	ADRA2B	DPH2
	ACHE	ACSL6	AMT	ADAMTSL3	ASTN2	ALPK3	DUSP6
	ACO2	ACSS2	APEH	ADM5	ATXN1L	ANK3	HP
	ACSL6	ACTL6B	AQP12A	AGRP	BAG5	ANKRD23	HPR
	ACSS2	ACTR1A	AQP12B	AIG1	BEND4	ANKRD36	IPO13
	ACTL6B	ADA	ARIH2	AKAP6	C14orf2	ANKRD36C	KDM4A
	ACTR1A	ADAD1	ARIH2OS	AKT3	C1orf53	ANKRD39	MEF2C
	ADAD1	ADAM1A	ATXN2	ALDH16A1	C22orf46	ANP32E	PCDH7
	ADAM15	ADCY3	BACH2	ALDOA	CCDC122	APH1A	PMFBP1
	ADAM1A	ADO	BCL2L11	ALMS1	CCDC134	ARID5A	POC1B
	ADAM30	AGAP5	BRAP	ALPK3	CCDC68	ASB16	PPP1R3A
	ADCY3	AHR	BSN	AMBRA1	CKB	ASTL	PTPRF
	ADO	AHSA2	C11orf1	ANAPC7	CRB1	ATP13A1	SEMA6D
	AGAP5	AL133458.1	C11orf52	ANKRD13A	CRYBA1	ATXN7L3	SORCS3
	AHSA2	ALDH2	C11orf88	ANKRD44	CSDC2	B3GNT1	SPAG16
	AK5	ALDOA	C12orf23	ANKRD45	DCAF4L1	BANF1	ST3GAL3
	AKAP11	AMIGO3	C3orf18	ANKRD63	DCC	BBS1	TMEM161B
	AL133458.1	AMT	C3orf62	ANP32E	DCDC1	BRAF	TMEM161B-AS1
	ALDH2	AMZ1	C3orf84	AP1G1	DENND1A	BRMS1	TXNL4B
	AMIGO3	ANKRD44	CACNA2D2	AP3B2	DENND1B	C11orf80	VWC2L
	AMT	ANKRD55	CAMKV	AP5B1	DESI1	C11orf86	ZFHX3
	AMZ1	ANKRD65	CCDC36	APH1A	DHODH	C17orf53
	ANGPTL3	AP4B1	CCDC71	APOPT1	DHX38	C1orf51
	ANKRD55	APEH	CCDC88B	ARFGAP2	DLST	C1orf54
	ANKRD65	APOBR	CD226	ARHGAP1	DNAJB7	CA14
	AP4B1	AQP12A	CD28	ARHGAP9	DNAJC24	CACNA1C
	AP5B1	AQP12B	CDHR4	ARL14EP	EIF2B2	CAPN3
	APEH	ARFRP1	CELSR3	ARL3	EIF5	CATSPER1
	APOBR	ARIH2	CIITA	ARL6IP4	ELP4	CCDC87
	AQP12A	ARIH2OS	CISD2	ARPC3	ENO1	CCNDBP1
	AQP12B	ARL3	CLEC16A	ARTN	ENOX1	CCS
	ARFRP1	ARPC1A	COL7A1	AS3MT	EP300	CD248
	ARHGEF2	ARPC2	CRY1	ASCL1	ESR2	CD47
	ARIH2	AS3MT	CUX2	ASPHD1	FANCL	CDAN1
	ARIH2OS	ASCC2	CYB561D2	ATF4	FBXL4	CIAO1
	ARL3	ASIC2	DAG1	ATG13	FCF1	CILP2
	ARPC1A	ASPHD1	DALRD3	ATP13A1	FLOT1	CNIH2
	ARPC2	ASXL1	DEXI	ATP2A2	GFM1	CNNM3
	AS3MT	ASZ1	DIXDC1	ATP6V0B	GPD2	CNNM4
	ASCC2	ATAD3B	DLAT	ATP6V0D1	HLA-E	CST6
	ASIC2	ATAD3C	DNAJC4	ATPAF2	HP	CTD-3074O7.12
	ASXL1	ATG16L1	DOCK3	ATXN7	HPR	CTSF
	ATAD3B	ATG4B	DOK6	B3GAT1	IER3	DAGLA
	ATAD3C	ATP2A1	ERP29	B3GNT9	IMMP1L	DENND2A
	ATG16L1	ATP6V0A1	FAM109A	B4GALT2	IST1	DNAH1
	ATG4B	ATXN2	FAM212A	B9D1	KIAA1143	DPP3
	ATG4C	ATXN2L	FAM213B	BAG4	KIF15	DUSP2
	ATP2A1	AUH	FDXACB1	BAG5	KLC1	ECM1
	ATP6V0A1	AURKAIP1	FERMT3	BAI1	L3MBTL2	EIF1AD
	ATRAID	B3GALT6	FKRP	BNIP3L	LACC1	EPB42
	ATXN2	BACH2	FLRT1	BOLA2B	LHX2	EPM2AIP1
	ATXN2L	BAZ2B	FOXP1	BOLL	LHX9	FADS1
	AUH	BCL2L15	GMPPB	BRD8	LRFN5	FADS2
	AURKAIP1	BCL7C	GNAI2	BRINP2	LTBP2	FADS3
	B3GALT6	BLZF1	GNAT1	BRINP3	LXN	FAHD2B
	BACH2	BOLA2B	GPR137	BTBD18	MARK3	FAM178B
	BANF1	BOLL	GPR35	C10orf32	MCHR1	FEN1
	BANK1	BRAP	GPX1	C11orf31	MDC1	FSTL5
	BAZ2B	BRDT	HDAC7	C11orf49	MEF2C	G6PC3
	BCL2L15	BSN	HECTD4	C12orf65	MEI1	GAL3ST3
	BCL9L	BTBD8	HEMK1	C12orf76	MFSD1	GANC
	BLZF1	C10orf32	HES5	C14orf2	MLF1	GATAD2A
	BRAP	C10orf55	HLA-B	C14orf23	MLH3	GLT8D1
	BRDT	C10orf95	HYAL1	C15orf40	MTHFD1	GLYCTK
	BRE	C11orf30	HYAL3	C15orf52	MYO18A	GMIP
	BSN	C11orf71	IFRD2	C16orf86	NEGR1	GNL3
	BTBD8	C11orf89	IL2	C16orf92	NEK9	GOLGA6L4
	C10orf32	C12orf40	IL21	C1orf51	NHP2L1	GOLGA6L5P
	C10orf55	C16orf92	IL2RA	C1orf54	NR4A2	GPAT2
	C10orf95	C16orf93	IMPDH2	C22orf46	NUFIP2	GRIN2A
	C11orf30	C17orf67	IP6K1	C2orf47	OLFM4	HAPLN4
	C11orf89	C1orf106	IP6K2	C2orf69	PGF	HAUS2
	C12orf40	C1orf141	KCNK4	C2orf78	PHLPP2	HDAC5
	C17orf67	C1orf146	KIAA1109	C2orf82	PIPOX	HHLA2
	C1orf106	C1orf53	KIF1A	C3orf49	PMFBP1	IFT57
	C1orf141	C20orf112	KLHDC8B	C4orf27	PMM1	ITIH1
	C1orf146	C20orf173	LAYN	C6orf100	POLR3H	ITIH3
	C1orf53	C20orf62	LSMEM2	CA14	POU3F2	ITIH4
	C20orf112	C2CD4D	MACROD1	CACNA1C	PPP1R13B	ITPRIPL1
	C20orf173	C2orf62	MANBA	CACNA1D	PPP1R18	KANSL3
	C22orf46	C2orf74	MAPKAPK3	CACNA1I	PROX2	KCNS1
	C2CD4D	C3orf18	MAPKAPK5	CACNB2	RAB27B	KLC2
	C2orf16	C3orf62	MICA	CACYBP	RANGAP1	LHFPL3
	C2orf53	C3orf84	MMEL1	CALB2	RARRES1	LINC00342
	C2orf62	C5orf47	MON1A	CALHM1	RBFOX1	LMAN2L
	C2orf74	C5orf56	MST1	CALHM2	RCN1	LPAR2
	C3orf18	C5orf66	MST1R	CCDC134	RD3L	LRFN4
	C3orf62	C7	MTERFD3	CCDC175	RERE	LRRC57
	C3orf84	C7orf72	NAA25	CCDC24	RP11-73M18.10	MATN4
	C5orf47	CABP7	NAT6	CCDC39	RPS6KL1	MAU2
	C5orf56	CACNA1S	NCKIPSD	CCDC63	RSRC1	MEF2B
	C5orf66	CACNA2D2	NDUFAF3	CD2BP2	SHISA9	MEF2BNB
	C7	CALB1	NFKB1	CDC20	SHOX2	MLH1
	C7orf71	CALM3	NICN1	CDC25C	SLC25A17	MRPL11
	C7orf72	CAMK2G	NPRL2	CDK2AP1	SLC30A9	MRPS21
	CA11	CAMKV	NUDT22	CENPL	SLC45A1	MRPS33
	CABP7	CAMSAP2	P4HTM	CENPM	SORCS3	MUSTN1
	CACNA1S	CARD6	PANK4	CENPT	SOX5	MYRF
	CACNA2D2	CARD9	PFKFB4	CEP170	SREBF2	NAGS
	CAD	CAST	PIH1D2	CFL1	ST13	NCAPH
	CALB1	CCDC101	PLCB3	CHRNA3	SYNE2	NDUFA13
	CAMK2G	CCDC116	PLCH2	CHRNA5	TCAIM	NDUFB2
	CAMKV	CCDC122	POU2AF1	CHRNB4	TCF4	NEK4
	CAMSAP2	CCDC181	PPP1R14B	CHST4	TDRD9	NISCH
	CARD6	CCDC36	PPP2R1B	CILP2	TEF	NMB
	CARD9	CCDC71	PRDX5	CKAP5	TENM2	NPAS4
	CAST	CCDC82	PRKAR2A	CKB	TIAF1	NT5DC2
	CCDC101	CCDC88B	PRKD2	CLCN3	TMED10	OTUD7B
	CCDC116	CCL11	PTPN11	CLDN25	TMEM106B	PABPC1L
	CCDC121	CCL7	QARS	CLP1	TMEM33	PACS1
	CCDC122	CCL8	QRICH1	CLU	TMEM42	PBRM1
	CCDC134	CCNL2	RAPGEF3	CMTR2	TOB2	PBX4
	CCDC181	CCNY	RASSF1	CNNM2	TOPAZ1	PC
	CCDC36	CCR1	RBM17	CNOT1	TRMT61A	PELI3
	CCDC71	CCR2	RBM5	CNTN4	TUBB	PHF7
	CCDC8	CCR3	RBM6	COQ10B	TXNL4B	PI3
	CCDC84	CCR5	RFX4	CORO1A	VRK2	PLA2G4F
	CCDC88B	CCR6	RNF123	CPEB1	VWDE	PLEKHO1
	CCL11	CCRL2	RP11-108O10.2	CPNE8	XPNPEP3	PPM1M
	CCL7	CD19	RP11-412D9.4	CPT1C	XRCC3	PPY
	CCL8	CD226	RP3-462E2.3	CREB3L1	XRCC6	PRPF3
	CCNL2	CD244	RPH3A	CROT	ZC2HC1C	PUS7
	CCNY	CD28	RPL6	CSDC2	ZC3H7B	PYY
	CCR1	CD2BP2	RPS6KA4	CSMD1	ZFHX3	RAB1B
	CCR2	CD302	RSPH1	CTCF	ZFYVE21	RAB3IL1
	CCR3	CD40	SDHD	CTNNA1	ZKSCAN7	RBM4
	CCR5	CD6	SEMA3F	CTNND1	ZNF197	RBM4B
	CCR6	CDC42SE2	SH2B3	CTRL	ZNF35	RCE1
	CCRL2	CDH1	SHISA5	CTSW	ZNF445	RFT1
	CD19	CDH3	SIK2	CUL3	ZNF501	RFXANK
	CD226	CDHR4	SLC1A5	CYB5R4	ZNF502	RHOD
	CD244	CDK12	SLC25A20	CYP17A1	ZNF660	RIMS1
	CD28	CDKAL1	SLC26A6	CYP2D6	ZNF821	RIN1
	CD302	CELF3	SLC48A1	CYP2D7P	ZNF852	RP4-813F11.4
	CD40	CELSR3	SLC9B1	CYP2D8P		RPRD2
	CD6	CENPO	SLC9B2	DAAM1		RPS6KA2
	CDC42SE2	CEP250	STIP1	DARS2		SART1
	CDHR4	CEP72	STRN4	DAZL		SCAND2P
	CDK12	CEP97	TCF4	DCP1A		SCN2A
	CDKAL1	CFTR	TCTA	DCTN2		SCN3A
	CELF3	CHP1	TEX40	DCTPP1		SEC11A
	CELSR3	CHP2	TIMM8B	DDB2		SEMA3G
	CENPM	CISD1	TMEM116	DDHD2		SEMA4C
	CENPO	CISD2	TMEM89	DDIT3		SEMG1
	CEP250	CIT	TMPRSS3	DESI1		SEMG2
	CFL1	CLN3	TNFRSF14	DFNA5		SF3B2
	CHP2	CLTC	TRAFD1	DGKZ		SFMBT1
	CISD1	CNNM2	TRAIP	DMTF1		SHANK2
	CIT	CNTF	TRMT112	DNAJB7		SLC28A1
	CLN3	CNTNAP1	TRPT1	DOC2A		SLC29A2
	CLTC	COL7A1	TTC34	DOCK10		SLC4A1
	CNNM2	COMMD7	TUSC2	DOCK4		SLPI
	CNTF	COQ10B	UBA7	DOPEY1		SNAP23
	CNTNAP1	CORO1A	UBASH3A	DPEP2		SNRNP200
	COL7A1	CPEB4	UBE2D3	DPEP3		SPCS1
	COMMD7	CPNE1	UCN2	DPH1		SPTBN2
	CPEB4	CPSF3L	UQCRC1	DPH2		SRPK2
	CPLX4	CRB1	USP19	DPYD		SSBP2
	CPNE1	CREM	USP4	DRG2		STAB1
	CPSF3L	CRTC3	VEGFB	DUS2		STARD7
	CRB1	CSF2	WDR6	DUSP11		STK4
	CREM	CSF3	ZMYND10	E2F4		SUGP1
	CRTC3	CTA-85E5.10		ECM1		SYT12
	CSDC2	CTD-3184A7.4		EDC4		TARS2
	CSF2	CTIF		EFEMP2		TGM5
	CSF3	CUL2		EFHD1		THSD7A
	CST6	CUX2		EFTUD1		TLR9
	CTA-85E5.10	CXCL1		EGR1		TM6SF2
	CTD-3088G3.8	CXCL2		EHBP1L1		TMEM101
	CTD-3184A7.4	CXCL3		ELMO3		TMEM110
	CTIF	CXCL5		ELOVL1		TMEM127
	CTSW	CXCL6		ELOVL7		TMEM151A
	CUL2	CXCR1		EMB		TMEM178B
	CUX2	CXCR2		ENKD1		TMEM258
	CWH43	CXXC11		ENO1		TMEM62
	CXCL1	CYB561D2		EP300		TMEM87A
	CXCL2	CYLD		EPHX2		TMUB2
	CXCL3	CYP17A1		EPM2AIP1		TNNC1
	CXCL5	CYTH1		EPN2		TOMM34
	CXCL6	D2HGDH		ERCC8		TRANK1
	CXCR1	DAG1		ESAM		TSSK6
	CXCR2	DAGLA		ESRP2		TTBK2
	CXCR5	DALRD3		ETF1		TWF2
	CXXC11	DAP		EXOC3L1		UBE2Q2L
	CYB561D2	DCLRE1B		EXOC6B		UBE2Q2P1
	CYLD	DCTN4		F2		UBR1
	CYP17A1	DCTPP1		FAM103A1		UBTF
	D2HGDH	DECR1		FAM109B		VPS39
	DAG1	DENND1B		FAM124B		VPS45
	DAGLA	DGKD		FAM13B		WDR73
	DALRD3	DGKE		FAM154B		WDR82
	DAP	DHX40		FAM216A		WFDC12
	DAP3	DLD		FAM53C		WFDC5
	DCLRE1B	DLL4		FAM57B		XPNPEP1
	DCTN4	DNAJC27		FAM65A		YIF1A
	DCUN1D4	DNAJC4		FAM89B		YJEFN3
	DDX6	DNLZ		FANCL		ZCCHC2
	DECR1	DNMT3A		FBXL8		ZDHHC24
	DENND1B	DNMT3B		FCGRT		ZNF101
	DESI1	DNMT3L		FES		ZNF106
	DGKD	DOC2A		FGFR1		ZNF14
	DGKE	DOCK3		FHIT		ZNF592
	DHX40	DOK6		FHOD1		ZSCAN2
	DNAJB4	DOK7		FIBP
	DNAJC27	DPH5		FOSL1
	DNAJC28	DTYMK		FOXG1
	DNAJC4	DUSP16		FOXP1
	DNAJC5G	DVL1		FSD2
	DNLZ	DYDC1		FSHB
	DNMT3A	DYDC2		FTCDNL1
	DNMT3B	DYRK3		FTSJ2
	DNMT3L	EDEM2		FURIN
	DOCK3	EFCAB8		FXR1
	DOCK7	EFR3B		GAB1
	DOK6	EGR2		GAS5
	DOK7	EIF3C		GATAD2A
	DONSON	EIF3CL		GDPD3
	DPH5	EIF6		GFOD2
	DPM3	ENOX1		GIGYF2
	DRAP1	EPHB4		GIT2
	DTYMK	EPHX4		GLI1
	DVL1	EPO		GLTP
	DYDC1	ERAP1		GMIP
	DYDC2	ERAP2		GOLGA6L10
	DYRK3	ERBB2		GOLGA6L18
	EDEM2	ERGIC1		GOLGA6L19
	EFCAB8	ERGIC3		GOLGA6L20
	EFEMP2	ERP29		GOLGA6L4
	EFNA1	ERRFI1		GOLGA6L5P
	EFNA3	EVI5		GOLGA6L9
	EFNA4	EVX1		GPM6A
	EFR3B	EXD1		GPN3
	EGR2	EXTL2		GPR135
	EIF1AD	EZH1		GPR182
	EIF2B4	F12		GPR52
	EIF3C	F5		GRAP
	EIF3CL	FADS1		GRAPL
	EIF6	FADS2		GRIA1
	ENOX1	FADS3		GRIN2A
	EP300	FAM109A		GRM3
	EPHB4	FAM132A		GTDC1
	EPHX4	FAM134C		HAPLN4
	EPO	FAM212A		HARBI1
	ERAP1	FAM213A		HBCBP
	ERAP2	FAM213B		HCN1
	ERBB2	FAM57B		HDDC3
	ERGIC1	FAM83C		HIRIP3
	ERGIC3	FAP		HOMER2
	ERP29	FBXL20		HS3ST5
	ERRFI1	FBXO24		HSD11B2
	EVI5	FCAR		HSPA9
	EXTL2	FCGR2A		HSPD1
	EZH1	FCGR3A		HSPE1
	F12	FDX1L		HVCN1
	F5	FEN1		HYDIN
	FADS1	FERMT3		HYI
	FADS2	FGFR1OP		HYKK
	FADS3	FLRT1		IFT81
	FAM109A	FNIP1		IGSF9B
	FAM132A	FOSL2		IL20RB
	FAM134C	FUT11		IMMP2L
	FAM189B	GAL3ST2		INA
	FAM212A	GALC		INHBC
	FAM213A	GCA		INHBE
	FAM73A	GCG		INO80E
	FAM83C	GDF5		INPP4B
	FAM83E	GDF5OS		IPO13
	FAP	GDPD3		IREB2
	FBXL20	GFI1		IRF3
	FBXO24	GGT7		JKAMP
	FCAR	GIGYF1		KAT5
	FCGR2A	GLMN		KCNG2
	FCGR3A	GLT8D1		KCNJ13
	FDPS	GLTPD1		KCNK7
	FDX1L	GLYAT		KCTD13
	FEN1	GMEB2		KCTD19
	FERMT3	GMPPB		KDM3B
	FGF21	GNA12		KDM4A
	FGFR1OP	GNAI2		KIAA0895L
	FIBP	GNAT1		KIAA1324L
	FLRT1	GNB2		KIF20A
	FNDC4	GNG8		KIF21A
	FNIP1	GNL3		KIF5A
	FOSL1	GPBAR1		KLC1
	FOSL2	GPR137		KLHL20
	FOXR1	GPR18		L3HYPDH
	FRYL	GPR183		L3MBTL2
	FUBP1	GPR25		LCAT
	FUT1	GPR35		LETM2
	FUT11	GPR65		LHFPL3
	FUT2	GPSM1		LPAR2
	GAL3ST2	GPX1		LRP1
	GALC	GPX4		LRP4
	GBA	GRB7		LRRC29
	GCA	GRK6		LRRC36
	GCG	GSDMA		LRRC48
	GCKR	GSDMB		LRRFIP2
	GDF5	GSS		LRRN3
	GDF5OS	HCK		LSM1
	GFI1	HDAC7		LTBP3
	GGT7	HECTD4		LUZP2
	GIGYF1	HELZ2		MAD1L1
	GIPC2	HEMK1		MADD
	GLMN	HES5		MAN2A2
	GLTPD1	HGFAC		MAP3K11
	GLYAT	HHEX		MAPK3
	GMEB2	HINT1		MAPK7
	GMPPB	HIPK1		MARK3
	GNA12	HIRIP3		MARS
	GNAI2	HLA-DQA1		MARS2
	GNAT1	HLA-DQA2		MARVELD3
	GNB2	HLA-DQB1		MAU2
	GON4L	HLA-DQB2		MCHR1
	GPBAR1	HLA-DRB1		MDK
	GPN1	HLA-DRB5		ME1
	GPR137	HLA-DRB6		MED19
	GPR18	HNF4A		MED8
	GPR183	HORMAD2		MEF2B
	GPR25	HOXA10		MEF2BNB
	GPR35	HOXA11		MEF2C
	GPR65	HOXA13		MEI1
	GPSM1	HOXA9		MGAT3
	GPX1	HSD17B1		MLH1
	GPX4	HSPA6		MMP16
	GRB7	HSPD1		MNT
	GRK6	HSPE1		MOB4
	GRP	HYAL1		MPHOSPH9
	GSDMA	HYAL3		MPP6
	GSDMB	ICAM3		MPPED2
	GSS	ICAM5		MRPS14
	GTF3C2	ICOSLG		MRPS21
	HCK	IDE		MRPS30
	HCN3	IFIH1		MSL2
	HECTD4	IFRD2		MSRA
	HELZ2	IKZF1		MTMR11
	HEMK1	IKZF3		MUS81
	HGFAC	IL10		MYBPC3
	HHEX	IL12B		MYO15A
	HIF3A	IL18R1		MYO1A
	HINT1	IL18RAP		NAB2
	HIPK1	IL19		NAGA
	HLA-B	IL1R1		NAT8
	HLA-C	IL1R2		NCK1
	HLA-DQA1	IL1RL1		NDRG4
	HLA-DQA2	IL1RL2		NDUFA13
	HLA-DQB1	IL2		NDUFA4L2
	HLA-DQB2	IL21		NDUFA6
	HLA-DRB1	IL23R		NDUFA6-AS1
	HLA-DRB5	IL27		NDUFAF2
	HLA-DRB6	IL2RA		NEAT1
	HORMAD2	IL3		NEK1
	HOXA1	IL5		NFATC3
	HOXA2	IMPDH2		NGEF
	HOXA3	IMPG2		NHP2L1
	HOXA4	ING5		NMB
	HOXA5	INO80		NME5
	HSD17B1	INO80E		NOSIP
	HSPA6	INPP5E		NPTX1
	HYAL1	INSL6		NR1H3
	HYAL3	IP6K1		NRGN
	ICAM3	IP6K2		NRN1L
	ICAM5	IPMK		NSUN6
	ICOSLG	IQGAP1		NT5C2
	IDE	IRF1		NUDT1
	IFIH1	IRF4		NUTF2
	IFNAR1	IRF5		NXPH4
	IFNGR2	IRGM		OGFOD2
	IFRD2	ITCH		OPCML
	IFT172	ITGB6		OR11A1
	IKZF1	ITIH1		OR12D2
	IKZF3	ITIH3		OR14J1
	IL10	ITIH4		OR2B3
	IL10RB	ITLN1		OR2J2
	IL12B	ITLN2		OR2W1
	IL18R1	ITPKA		OR5V1
	IL18RAP	JAK2		OR9Q2
	IL19	JRKL		OSBPL3
	IL1R1	KCNH7		OTUD7B
	IL1R2	KCNK4		OVOL1
	IL1RL1	KCTD13		PACSIN3
	IL1RL2	KEAP1		PAH
	IL2	KIAA1107		PAK6
	IL21	KIAA1109		PARD6A
	IL23R	KIAA1841		PARP8
	IL27	KIAA1919		PBX4
	IL2RA	KIF11		PCCB
	IL3	KIF1A		PCNXL3
	IL5	KIF21B		PDCD11
	IMPDH2	KIF3B		PDE4B
	ING5	KIR3DL1		PEMT
	INPP5E	KIR3DL2		PGM3
	INSL6	KLHDC8B		PHLPP2
	IP6K1	KPNA7		PKD2L2
	IP6K2	LACC1		PLA2G15
	IPMK	LAMB1		PLCB2
	IQGAP1	LAT		PLCH2
	IRF1	LHX9		PLCL1
	IRF4	LIF		PLCL2
	IRGM	LIME1		PLEKHG4
	ITCH	LINC01146		PLEKHO1
	ITGB6	LINGO4		PMM1
	ITLN1	LITAF		POLR3H
	ITLN2	LIX1		PPAPDC1B
	ITSN1	LMAN2		PPP1CC
	IZUMO1	LNPEP		PPP1R13B
	JAK2	LOH12CR1		PPP1R16B
	JAZF1	LPXN		PPP2R2A
	KAT5	LRPAP1		PPP2R3A
	KCNH7	LRRC2		PPP4C
	KCNK4	LRRC3C		PPTC7
	KEAP1	LRRK2		PQLC1
	KIAA1107	LSMEM2		PRC1
	KIAA1109	LTK		PRDX6
	KIAA1841	LY75		PRICKLE2
	KIAA1919	LY9		PRKCB
	KIF11	LYRM7		PRKCD
	KIF1A	MACROD1		PRKD1
	KIF21B	MAGI3		PRMT7
	KIF3B	MAML2		PRPF3
	KIR3DL1	MANBA		PRR12
	KIR3DL2	MAP1B		PRRG2
	KLHDC8B	MAP1LC3A		PRSS35
	KPNA7	MAP3K8		PSD3
	KRTCAP2	MAP4K4		PSMA4
	KRTCAP3	MAPK3		PSMB10
	KSR1	MAPKAPK2		PSMC3
	L3MBTL2	MAPKAPK3		PSMD6
	LACC1	MAPKAPK5		PTK2B
	LAMTOR2	MAPRE1		PTN
	LAT	MARCH7		PTPRF
	LGALS9	MARS2		PTPRK
	LHX9	MED24		PUS7
	LIF	MIEN1		R3HDM2
	LIME1	MLX		RABGAP1L
	LINC01146	MMEL1		RAD9B
	LINGO4	MMP24		RAI1
	LITAF	MMP9		RANGAP1
	LIX1	MOB4		RBFOX1
	LMAN2	MON1A		RBM26
	LMNA	MOSPD3		RBM26-AS1
	LNPEP	MRPL20		RC3H1
	LPXN	MRPL23		RCCD1
	LRPAP1	MRPL9		RCN3
	LRRC2	MRPS27		RD3L
	LRRC3C	MST1		RDH16
	LRRC66	MST1R		REEP2
	LRRK2	MTHFD2L		RELA
	LSMEM2	MTMR3		RERE
	LTBR	MUC19		RFT1
	LY75	MUC3A		RFTN2
	LY9	MUSTN1		RFXANK
	LYRM7	MXD3		RGS6
	MACROD1	MXRA8		RILPL2
	MAGI3	MYH7B		RIMS1
	MAMSTR	MYOZ1		RIPPLY2
	MAP1B	MYOZ3		RLTPR
	MAP1LC3A	MYRF		RNASEH2C
	MAP3K11	NAA25		RNF112
	MAP3K8	NAGLU		RP1-95L4.4
	MAP4K4	NAT6		RP11-1113L8.1
	MAPKAPK2	NBN		RP11-18I14.10
	MAPKAPK3	NCKIPSD		RP11-197N18.2
	MAPKAPK5	NCOA1		RP11-469A15.2
	MAPRE1	NCOA6		RP11-499P20.2
	MARCH7	NCR1		RP11-627G23.1
	MED24	NDFIP1		RP11-73M18.10
	MEI1	NDST2		RP11-85F14.5
	MEX3A	NDUFAF1		RP11-890B15.3
	MIEN1	NDUFAF3		RP11-96D1.11
	MLX	NEK4		RPEL1
	MMP24	NEU4		RPL13A
	MMP9	NEUROD2		RPRD2
	MON1A	NFATC1		RPS11
	MOSPD3	NFATC2IP		RPS17
	MPV17	NFKB1		RPS17L
	MRPL20	NFKBIZ		RPTOR
	MRPL23	NICN1		RRAS
	MRPL33	NISCH		RTN1
	MRPL9	NKX2-3		RTN4RL1
	MRPS27	NME7		RTN4RL2
	MST1	NOD2		RWDD2A
	MST1R	NPIPB6		SATB2
	MSTO1	NPIPB7		SBNO1
	MTHFD2L	NPIPB8		SCAF1
	MTMR3	NPIPB9		SCAND2P
	MTX1	NPRL2		SCAND3
	MUC1	NR5A2		SDCCAG8
	MUC19	NT5DC2		SEC11A
	MUC3A	NUDT22		SEMA6D
	MUS81	NUPR1		SEPHS2
	MXD3	NUSAP1		2001-09-01
	MXRA8	NXPE1		SERPINC1
	MYH7B	NXPE3		SERPING1
	MYOZ1	NXPE4		SETD6
	MYOZ3	OAZ3		SETD8
	MYRF	OIP5		SEZ6L2
	NAA25	OIP5-AS1		SF3B1
	NAGLU	OLFML3		SF3B4
	NAT6	OR10Q1		SFXN2
	NBN	OR5B12		SFXN5
	NCKIPSD	OR5B2		SGSM2
	NCOA1	OR5B21		SHISA8
	NCOA6	OR9Q2		SIAE
	NCR1	ORMDL3		SIPA1
	NDFIP1	OSGIN2		SLC12A4
	NDST2	OSM		SLC25A17
	NDUFAF3	OSMR		SLC25A45
	NEU4	OTUD3		SLC28A1
	NEUROD2	P4HA2		SLC32A1
	NEXN	P4HTM		SLC35G2
	NFATC1	PANK4		SLC38A7
	NFATC2IP	PAPOLG		SLC39A13
	NHP2L1	PARK7		SLC39A8
	NICN1	PBRM1		SLC43A1
	NKX2-3	PCNP		SLC45A1
	NME7	PCOLCE		SLC47A1
	NOD2	PDCD1		SLC5A10
	NOTCH2	PDCL3P4		SLC6A11
	NPIPB6	PDE4A		SLC7A6
	NPIPB7	PDLIM4		SLC7A6OS
	NPIPB8	PEX13		SLC9A5
	NPIPB9	PF4V1		SLC9C2
	NPRL2	PFKFB4		SMDT1
	NR5A2	PFN3		SMG6
	NRBP1	PGAP3		SMIM15
	NTN5	PHACTR2		SMTNL1
	NUDT22	PHKG2		SNAP91
	NUPR1	PHTF1		SNX19
	OAZ3	PIGU		SNX32
	OCIAD1	PKIG		SPA17
	OCIAD2	PLA2G2E		SPATA31D1
	OLFML3	PLA2G4A		SPATS2L
	OR10Q1	PLA2R1		SPI1
	OR5B12	PLAGL2		SREBF1
	OR5B2	PLAU		SREBF2
	OR5B21	PLCB3		SRPK2
	OR9Q2	PLCH2		SRR
	ORMDL3	PLCL1		ST13
	OSGIN2	PLEKHH2		ST3GAL3
	OSM	PLEKHH3		STAC3
	OSMR	PMPCA		STAG1
	OTUD3	PNKD		STAMBP
	OVOL1	PNMT		STAT6
	P4HA2	POFUT1		SUFU
	P4HTM	POLR2E		SUGP1
	PAPOLG	POMC		SULT1A3
	PARK7	POP7		SYNGR1
	PCNXL3	PPA2		SZT2
	PCOLCE	PPBP		TAB1
	PDCD1	PPIL2		TAC3
	PDE4A	PPP1R14B		TAF5
	PDLIM4	PPP1R1B		TAOK2
	PEX13	PPP4C		TARS2
	PF4V1	PPP5D1		TAT
	PFKFB4	PRDM1		TBC1D10B
	PFN3	PRDX5		TBC1D2
	PGAP3	PRKAA1		TBC1D5
	PHACTR2	PRKAB1		TBRG1
	PHTF1	PRKAR2A		TBX6
	PIGU	PRKCB		TCF20
	PKLR	PRKRIR		TCF4
	PLA2G2E	PROCR		TCHP
	PLA2G4A	PSMC3IP		TCTN1
	PLA2R1	PSMD3		TDRD9
	PLAGL2	PTCD2		TEF
	PLAU	PTGER4		THEMIS
	PLCB3	PTGIR		THOC7
	PLEKHH2	PTK2B		TIE1
	PLEKHH3	PTPN11		TIMM10
	PMM1	PTPN2		TKT
	PMPCA	PTPN22		TM6SF2
	PNKD	PTPRC		TMEM180
	PNMT	PTRF		TMEM194A
	POFUT1	PTRHD1		TMEM208
	POLR2E	PUS10		TMEM219
	POLR3H	PUSL1		TMEM243
	POMC	QARS		TMPRSS5
	POP7	QRICH1		TMX2
	PPBP	QSOX2		TNFRSF13C
	PPIL2	RAB3IL1		TNN
	PPM1G	RABEP2		TOB2
	PPP1R14B	RAD51B		TOM1L2
	PPP1R1B	RAPGEF3		TPPP3
	PPP5C	RAPGEF6		TPRKB
	PRDM1	RASGRP1		TRANK1
	PRDX5	RASSF1		TRIM27
	PREB	RAVER1		TRIM35
	PRKAA1	RBM5		TRIM8
	PRKAB1	RBM6		TRMT61A
	PRKAR2A	RBM7		TRPV4
	PRKCB	RBPJ		TSNARE1
	PRKRIR	RCL1		TSNAXIP1
	PRM1	REL		TSR1
	PRM2	REV3L		TSSK6
	PRM3	REXO2		TYW5
	PROCR	RFT1		U91319.1
	PSMC3IP	RFTN2		UBE2L6
	PSMD3	RGS12		UBE2Q2L
	PTCD2	RGS14		UBE2Q2P1
	PTGER4	RICTOR		UBE3D
	PTGFR	RIIAD1		UNC45A
	PTK2B	RIMBP3C		USMG5
	PTPN11	RIPK2		USP28
	PTPN2	RNASET2		USP38
	PTPN22	RNF123		VPS29
	PTPRC	RNF145		VPS45
	PTPRK	RNF186		VRK2
	PTRF	RNF40		VSIG2
	PTRHD1	RNFT1		WBP1L
	PUS10	RORC		WBP2NL
	PUSL1	RP11-137H2.6		WDR73
	QARS	RP11-18I14.10		WHAMM
	QRICH1	RP11-290F20.1		WHSC1L1
	QSOX2	RP11-355B11.2		WNT8A
	RAB25	RP11-37B2.1		XPNPEP3
	RAB3IL1	RP11-421L21.3		XRCC3
	RABEP2	RP3-462E2.3		XRCC6
	RAD51B	RP5-1085F17.3		YJEFN3
	RANGAP1	RPAP1		YPEL3
	RAPGEF6	RPAP2		YPEL4
	RASA2	RPH3A		ZBTB37
	RASGRP1	RPL24		ZBTB39
	RASIP1	RPL3		ZC3H7B
	RASSF1	RPL37		ZDHHC1
	RAVER1	RPL6		ZDHHC5
	RAX	RPS6KA4		ZEB2
	RBKS	RPS6KB1		ZFYVE21
	RBM5	RSBN1		ZNF101
	RBM6	RTEL1		ZNF14
	RBPJ	RTF1		ZNF19
	RCL1	RTP3		ZNF23
	REG4	RUFY4		ZNF281
	REL	S1PR5		ZNF311
	RELA	SATB2		ZNF408
	REV3L	SBK1		ZNF439
	RGS12	SBNO2		ZNF440
	RGS14	SCNN1D		ZNF441
	RICTOR	SDCCAG3		ZNF48
	RIIAD1	SDF2L1		ZNF491
	RIMBP3C	SDF4		ZNF592
	RIPK2	SEC16A		ZNF771
	RIT1	SEC24C		ZNF804A
	RMI2	SEMA3F		ZNF823
	RNASEH2C	SENP7		ZSCAN2
	RNASET2	SEPHS2		ZSWIM6
	RNF123	2001-09-01		ZW10
	RNF145	SERINC3
	RNFT1	SF3B1
	RORC	SFMBT1
	RP11-137H2.6	SFXN2
	RP11-158I13.2	SH2B1
	RP11-183M13.1	SH2B3
	RP11-18I14.10	SH2D4B
	RP11-290F20.1	SHISA5
	RP11-355B11.2	SLAMF7
	RP11-37B2.1	SLC11A1
	RP11-421L21.3	SLC12A5
	RP3-462E2.3	SLC12A9
	RP5-1085F17.3	SLC19A2
	RPAP2	SLC22A23
	RPH3A	SLC22A4
	RPL3	SLC22A5
	RPL37	SLC25A20
	RPL6	SLC26A3
	RPS25	SLC26A6
	RPS6KA4	SLC2A13
	RPS6KB1	SLC2A4RG
	RSBN1	SLC30A7
	RSPH3	SLC34A1
	RSPO3	SLC39A11
	RTEL1	SLC48A1
	RTP3	SLC7A10
	RUFY4	SLC9A3
	RUSC1	SLC9A4
	RXFP4	SLC9B1
	S1PR5	SLC9B2
	SART1	SMAD3
	SBK1	SMAD7
	SBNO2	SMIM3
	SCNN1A	SNAPC4
	SCNN1D	SNX20
	SDCCAG3	SNX27
	SDF2L1	SPAG4
	SDF4	SPCS1
	SEC16A	SPNS1
	SEC24C	SPRED2
	SEMA3F	SRRT
	SFXN2	STAB1
	SGCB	STARD3
	SH2B1	STAT1
	SH2B3	STAT3
	SH2D4B	STAT4
	SHISA5	STAT5A
	SHISA8	STAT5B
	SIPA1	STIP1
	SKAP2	STMN3
	SLAIN2	STMN4
	SLAMF7	SUFU
	SLC10A4	SULT1A1
	SLC11A1	SULT1A2
	SLC12A5	SULT1A3
	SLC12A9	SUN5
	SLC19A2	SYNGR1
	SLC22A23	SYNPO2L
	SLC22A4	TAB2
	SLC22A5	TAOK2
	SLC25A20	TAS1R3
	SLC26A6	TBC1D10B
	SLC2A13	TBX6
	SLC2A4RG	TCAP
	SLC30A3	TCTA
	SLC30A7	TDGF1
	SLC34A1	TDRKH
	SLC37A4	TET2
	SLC39A11	TEX40
	SLC4A1AP	TFR2
	SLC50A1	TGFBR3
	SLC5A6	THADA
	SLC7A10	THAP4
	SLC9A4	THEM4
	SMAD3	THEM5
	SMAD7	TIMP2
	SMIM3	TM9SF4
	SNAPC4	TMBIM1
	SNX17	TMCO4
	SNX20	TMEM110
	SNX27	TMEM116
	SNX32	TMEM135
	SP110	TMEM180
	SP140	TMEM219
	SP140L	TMEM233
	SPAG4	TMEM258
	SPATA18	TMEM89
	SPHK2	TNFRSF14
	SPNS1	TNFRSF4
	SPRED2	TNFRSF6B
	SREBF2	TNFRSF9
	SRRT	TNFSF15
	STARD3	TNFSF8
	STAT1	TNNC1
	STAT3	TNNI2
	STAT4	TNNT3
	STAT5A	TNPO3
	STAT5B	TP53INP2
	STIP1	TPPP
	STMN3	TRAF3IP2
	STMN4	TRAFD1
	SUFU	TRAIP
	SULT1A1	TRIM35
	SULT1A2	TRIM8
	SULT2B1	TRIP6
	SUN5	TRMT10C
	SYNGR1	TRMT112
	SYNPO2L	TRPC4AP
	SYT11	TRPT1
	TAB2	TSPAN14
	TAGAP	TTC33
	TAS1R3	TTC34
	TCAP	TTPAL
	TCF23	TUBD1
	TCTA	TUBG1
	TDGF1	TUBG2
	TDRKH	TUFM
	TEC	TUSC2
	TEF	TYK2
	TEX40	TYRO3
	TFR2	UBA7
	TGFBR3	UBAC2
	THADA	UBE2D1
	THAP4	UBE2D3
	THBS3	UBE2J2
	THEM4	UBE2L3
	THEM5	UBE2V2
	THEMIS	UBLCP1
	TM9SF4	UCN2
	TMBIM1	UFSP1
	TMEM116	UQCC1
	TMEM135	UQCR10
	TMEM171	UQCRC1
	TMEM174	USP19
	TMEM180	USP34
	TMEM233	USP36
	TMEM258	USP4
	TMEM50B	USP40
	TMEM89	UTS2
	TNFRSF13C	VEGFB
	TNFRSF4	VMP1
	TNFRSF6B	VPS25
	TNFRSF9	VWA1
	TNFSF15	VWC2
	TNFSF8	WBP1L
	TNNI2	WDR6
	TNNT3	WNT2
	TNP2	XPO1
	TOB2	YDJC
	TP53INP2	YPEL1
	TRAF3IP2	YPEL3
	TRAFD1	ZBTB11
	TRAIP	ZBTB46
	TRAPPC4	ZDHHC11
	TRIM35	ZDHHC11B
	TRIM46	ZFP36L1
	TRIM54	ZFP36L2
	TRIM8	ZFP90
	TRIP6	ZFP91
	TRMT112	ZGLP1
	TRPC4AP	ZGPAT
	TRPT1	ZMAT5
	TSPAN14	ZMIZ1
	TTC33	ZMYND10
	TUBD1	ZNF300
	TUBG1	ZNF365
	TUBG2	ZNF366
	TUFM	ZNF48
	TUSC2	ZNF629
	TYK2	ZNF688
	UBA7	ZNF689
	UBAC2	ZNF747
	UBE2D1	ZNF764
	UBE2J2	ZNF768
	UBE2L3	ZNF771
	UBE2V2	ZNF785
	UBLCP1	ZNF831
	UBQLN4	ZPBP
	UCN	ZPBP2
	UCN2	ZSWIM8
	UFSP1
	UPK2
	UQCC1
	UQCR10
	UQCRC1
	USP1
	USP19
	USP33
	USP34
	USP4
	USP40
	UTS2
	VEGFB
	VMP1
	VPS25
	VWA1
	VWC2
	WBP1L
	WDR6
	XPO1
	XRCC6
	YDJC
	YPEL1
	YY1AP1
	ZBTB38
	ZBTB46
	ZC3H7B
	ZFP36L1
	ZFP36L2
	ZFP91
	ZGLP1
	ZGPAT
	ZMAT5
	ZMIZ1
	ZMYND10
	ZNF300
	ZNF365
	ZNF366
	ZNF513
	ZNF831
	ZPBP
	ZPBP2
	ZSWIM8
	ZZZ3
