# Supplementary material for: Cross-tissue transcriptome-wide association studies of 885,176 individuals and seven diseases of the gut-brain axis identify susceptibility genes shared between schizophrenia and inflammatory bowel disease
Source: Research Square preprint supplement (doi:10.21203/rs.3.rs-590423/v1), 2021-07-15
Supplement: Supplementary file 2 [file 2b7be0c2a88934ab663099ec.xlsx]

## Sheet: Supplementary Table 2
Tissue	number of tissue-specific reference samples (genotype and normalized gene expression data) used to train UTMOST	number of successfully trained genes in UTMOST
GTEx Brain_Anterior_cingulate_cortex_BA24	72	10822
GTEx Brain_Caudate_basal_ganglia	100	11669
GTEx Brain_Cerebellar_Hemisphere	89	10895
GTEx Brain_Cerebellum	103	11245
GTEx Brain_Cortex	96	11482
GTEx Brain_Frontal_Cortex_BA9	92	11555
GTEx Brain_Hippocampus	81	11500
GTEx Brain_Hypothalamus	81	11800
GTEx Brain_Nucleus_accumbens_basal_ganglia	93	11576
GTEx Brain_Putamen_basal_ganglia	82	11167
GTEx Colon_Sigmoid	124	12047
GTEx Colon_Transverse	169	12583
GTEx Esophagus_Gastroesophageal_Junction	127	11860
GTEx Esophagus_Mucosa	241	12354
GTEx Esophagus_Muscularis	218	12065
GTEx Liver_GTEx	97	10846
GTEx Pancreas	149	11452
GTEx Small_Intestine_Terminal_Ileum	77	11976
GTEx Whole_Blood	338	11209
STARNET Liver	600	5963
BLUEPRINT mono_eqtl CD14+	338	5640
BLUEPRINT neut_eqtl CD16+	338	4870
BLUEPRINT tcel_eqtl naive CD4+	338	4838
Total	4043
