# Supplementary material for: Cross-tissue transcriptome-wide association studies of 885,176 individuals and seven diseases of the gut-brain axis identify susceptibility genes shared between schizophrenia and inflammatory bowel disease
Source: Research Square preprint supplement (doi:10.21203/rs.3.rs-590423/v1), 2021-07-15
Supplement: Supplementary file 3 [file 2fdc0ed30c80c8fff73184cf.xlsx]

## Sheet: Supplementary Table 4
Study nr.	Phenotype	S-PrediXcan ρ	S-PrediXcan p-value (any correlation)	S-PrediXcan β	UTMOST ρ	UTMOST p-value (any correlation)	UTMOST β	FUSION ρ	FUSION p-value (any correlation)	FUSION β
1	Crohn’s disease (CD)	0.884886	4.86211e-07	0.3832	0.570927	0.0106785	0.0985913	0.912089	5.40729e-08	0.316408
2	Crohn’s disease (CD) validation	0.763205	0.000143959	0.107579	0.50638	0.0269422	0.0192394	0.772152	0.000107266	0.0980705
3	Ulcerative colitis (UC)	0.880105	6.75619e-07	0.229087	0.428007	0.0675328	0.0336276	0.88088	6.41162e-07	0.205033
4	Ulcerative colitis (UC) validation	0.736357	0.000324447	0.0791468	0.341866	0.151978	0.0210721	0.819341	1.77348e-05	0.093153
5	Primary Sclerosing Cholangitis (PSC)	0.904051	1.10606e-07	0.217803	0.705108	0.000746888	0.0537668	0.90566	9.63304e-08	0.200899
6	Primary Sclerosing Cholangitis (PSC) validation	0.870544	1.25391e-06	0.189088	0.477573	0.0386522	0.0368572	0.870714	1.24073e-06	0.178339
7	Schizophrenia (SCZ)	0.840879	6.51546e-06	0.212313	0.821178	1.63681e-05	0.0878424	0.886743	4.26215e-07	0.224235
8	Major depressive disorder (MDD)	0.302651	0.207866	0.0168407	0.360953	0.128947	0.00956243	0.169499	0.48786	0.0063306
9	Bipolar disorder (BD)	0.807854	2.87257e-05	0.0468389	0.279792	0.24599	0.0254705	0.813985	2.22966e-05	0.0486794
10	Attention deficit/hyperactivity disorder (ADHD)	0.500641	0.0290186	0.00847168	0.113153	0.644639	0.000785098	0.347073	0.145432	0.00541467
	Average	0.749117	0.0237391	0.149037	0.460494	0.131612	0.0386815	0.737814	0.0633442	0.137656

## Sheet: Reference Samples
Tissue	Number_of_samples_used_in_FUSION	Number_of_samples_used_in_Metaxcan	Number_of_samples_used_in_UTMOST
Brain_Anterior_cingulate_cortex_BA24	109	102	72
Brain_Caudate_basal_ganglia	144	126	100
Brain_Cerebellar_Hemisphere	125	113	89
Brain_Cerebellum	154	137	103
Brain_Cortex	136	119	96
Brain_Frontal_Cortex_BA9	118	104	92
Brain_Hippocampus	111	99	81
Brain_Hypothalamus	108	98	81
Brain_Nucleus_accumbens_basal_ganglia	130	114	93
Brain_Putamen_basal_ganglia	111	98	82
Colon_Sigmoid	203	185	124
Colon_Transverse	246	210	169
Esophagus_Gastroesophageal_Junction	213	185	127
Esophagus_Mucosa	358	307	241
Esophagus_Muscularis	335	287	218
Liver	153	134	97
Pancreas	220	180	149
Small_Intestine_Terminal_Ileum	122	103	77
Whole_Blood	369	315	338
