# Supplementary material for: Cross-tissue transcriptome-wide association studies of 885,176 individuals and seven diseases of the gut-brain axis identify susceptibility genes shared between schizophrenia and inflammatory bowel disease
Source: Research Square preprint supplement (doi:10.21203/rs.3.rs-590423/v1), 2021-07-15
Supplement: Supplementary file 4 [file 4c117d01ea6798b2c0379996.xlsx]

## Sheet: Supplementary Table 1
Study nr.	Phenotype	Consortium	#Cases	#Controls	#SNPs	PubMedID	Comment
1	Crohn’s disease (CD)	International Inflammatory Bowel Disease Genetics Consortium (IIBDGC)	18.431	33.658	8,802,553	26974007
2	Crohn’s disease (CD)	International Inflammatory Bowel Disease Genetics Consortium (IIBDGC)	5.956	14.927	11,002,659	26192919	2616 CD cases and 7,379 controls shared with study nr. 1 PubMedID 26974007
3	Ulcerative colitis (UC)	International Inflammatory Bowel Disease Genetics Consortium (IIBDGC)	14.191	33.658	8,765,715	26974007
4	Ulcerative colitis (UC)	International Inflammatory Bowel Disease Genetics Consortium (IIBDGC)	6.968	20.464	11,113,953	26192919	2538 UC cases and 7,379 controls shared with study nr.3 PubMedID 26974007
5	Primary Sclerosing Cholangitis (PSC)	The International PSC Study Group	3.377	33.658	8,633,069	26974007
6	Primary Sclerosing Cholangitis (PSC)	The International PSC Study Group	2.871	12.019	7,891,602	27992413	1,910 PSC cases and 2,115 controls shared with study nr. 5 PubMedID 26974007
7	Schizophrenia (SCZ)	Psychiatric Genomics Consortium	36.989	113.075	9,444,230	25056061
8	Major depressive disorder (MDD)	Psychiatric Genomics Consortium	135.458	344.901	11,358,427	29700475
9	Bipolar disorder (BD)	Psychiatric Genomics Consortium	9.412	137.760	10,952,473	31043756
10	Attention deficit/hyperactivity disorder (ADHD)	Psychiatric Genomics Consortium	20.183	35.191	8,047,421	30478444
Total			246,772*	638,454*			*Number of non-overlapping cases and controls
