# Supplementary material for: Cross-tissue transcriptome-wide association studies of 885,176 individuals and seven diseases of the gut-brain axis identify susceptibility genes shared between schizophrenia and inflammatory bowel disease
Source: Research Square preprint supplement (doi:10.21203/rs.3.rs-590423/v1), 2021-07-15
Supplement: Supplementary file 5 [file 7014f29f5e0f8c6d007fa55c.xlsx]

## Sheet: Supplementary Table 14
Input genes	Reason for inclusion
NR5A2	Single tissue conditional overlap gene
SATB2	Single tissue conditional overlap gene
PPP3CA	Single tissue conditional overlap gene
SF3B1	GBJ conditional overlap gene
INO80E	GBJ conditional overlap gene
SGSM3	GBJ conditional overlap gene
ZC3H7B	GBJ conditional overlap gene
GDPD3	GBJ conditional significant in SCZ in INO80E locus
HIRIP3	GBJ conditional significant in SCZ in INO80E locus
MAPK3	GBJ conditional significant in SCZ in INO80E locus
ZNF688	GBJ conditional significant in SCZ in INO80E locus
BOLA2	GBJ conditional significant in UC in INO80E locus
C16orf92	GBJ conditional significant in UC in INO80E locus
CORO1A	GBJ conditional significant in UC in INO80E locus
NPIPB11	GBJ conditional significant in UC in INO80E locus
SEPHS2	GBJ conditional significant in UC in INO80E locus
TBC1D10B	GBJ conditional significant in UC in INO80E locus
ZNF48	GBJ conditional significant in UC in INO80E locus
ZNF629	GBJ conditional significant in UC in INO80E locus
MGAT3	GBJ conditional significant in SCZ in SGSM3/ZC3H7B locus
EP300	GBJ conditional significant in CD in SGSM3/ZC3H7B locus
L3MBTL2	GBJ conditional significant in CD in SGSM3/ZC3H7B locus
DESI1	GBJ conditional significant in CD in SGSM3/ZC3H7B locus
MEI2	GBJ conditional significant in CD in SGSM3/ZC3H7B locus
NHP2L1	GBJ conditional significant in CD in SGSM3/ZC3H7B locus
SREBF2	GBJ conditional significant in CD in SGSM3/ZC3H7B locus
CSNK1A1	HEIDI pleiotropy outlier of significant UC to SCZ MR association in Esophagus_Gastroesophageal_Junction

## Sheet: Results BioPlanet 2019
Term	Overlap	P-value	Adjusted P-value	Odds Ratio	Combined Score	Genes
Calcineurin-dependent NFAT signaling role in lymphocytes	4/55	8.56821e-07	0.00029646	67.9352	949.057	PPP3CA;CSNK1A1;EP300;MAPK3
PELP1 modulation of estrogen receptor activity	2/7	3.67017e-05	0.00634939	319.488	3262.83	EP300;MAPK3
NFAT involvement in hypertrophy of the heart	3/69	0.000108323	0.00938645	37.7027	344.24	PPP3CA;CSNK1A1;MAPK3
Long-term potentiation	3/70	0.000113072	0.00938645	37.1381	337.492	PPP3CA;EP300;MAPK3
Melanocyte development and pigmentation pathway	2/13	0.000135642	0.00938645	145.178	1292.88	EP300;MAPK3
ERBB2 role in signal transduction and oncology	2/26	0.000559096	0.031956	66.4967	498.006	EP300;MAPK3
Retinoic acid receptor-mediated signaling	2/30	0.000745843	0.031956	56.9857	410.354	EP300;MAPK3
Signaling pathway from G-protein families	2/30	0.000745843	0.031956	56.9857	410.354	PPP3CA;MAPK3
Interleukin-7 signaling pathway	2/35	0.00101594	0.031956	48.3394	333.152	EP300;MAPK3
MEF2D role in T cell apoptosis	2/35	0.00101594	0.031956	48.3394	333.152	PPP3CA;EP300
fMLP induced chemokine gene expression in HMC-1 cells	2/35	0.00101594	0.031956	48.3394	333.152	PPP3CA;MAPK3
Fc epsilon receptor I signaling in mast cells	2/41	0.00139316	0.038901	40.8903	268.902	PPP3CA;MAPK3
Messenger RNA splicing: minor pathway	2/42	0.0014616	0.038901	39.866	260.254	NHP2L1;SF3B1
Presenilin action in Notch and Wnt signaling	2/48	0.00190532	0.0429202	34.6557	217.052	CSNK1A1;MAPK3
Energy metabolism	2/48	0.00190532	0.0429202	34.6557	217.052	PPP3CA;EP300
FoxO family signaling	2/49	0.00198475	0.0429202	33.9166	211.038	CSNK1A1;EP300
Kit receptor signaling pathway	2/54	0.0024051	0.0489509	30.6477	184.811	EP300;MAPK3
Mechanism of gene regulation by peroxisome proliferators via PPAR-alpha	2/57	0.00267575	0.0514338	28.9716	171.614	EP300;MAPK3
ATF2 transcription factor network	2/59	0.00286379	0.0521511	27.9523	163.678	EP300;MAPK3
Wnt signaling pathway	3/231	0.00362508	0.0623529	10.8251	60.8358	PPP3CA;CSNK1A1;EP300
CD8/T cell receptor downstream pathway	2/68	0.00378442	0.0623529	24.1297	134.568	PPP3CA;MAPK3
Renal cell carcinoma	2/70	0.00400537	0.0629935	23.4176	129.268	EP300;MAPK3
Adherens junction cell adhesion	2/74	0.00446487	0.0671671	22.1122	119.661	EP300;MAPK3
VEGF signaling pathway	2/76	0.00470336	0.0678068	21.5124	115.295	PPP3CA;MAPK3
Regular glucocorticoid receptor pathway	2/82	0.00545345	0.06977	19.893	103.673	EP300;MAPK3
T cell signal transduction	2/83	0.00558347	0.06977	19.6464	101.925	PPP3CA;MAPK3
C-Myb transcription factor network	2/85	0.00584777	0.06977	19.1711	98.5719	PPP3CA;EP300
TGF-beta regulation of skeletal system development	2/85	0.00584777	0.06977	19.1711	98.5719	EP300;MAPK3
MicroRNAs in cardiomyocyte hypertrophy	2/85	0.00584777	0.06977	19.1711	98.5719	PPP3CA;MAPK3
Prostate cancer	2/89	0.0063933	0.073736	18.286	92.39	EP300;MAPK3
ERK activation	1/5	0.00673239	0.0751422	192.01	960.207	MAPK3
Interferon-gamma signaling pathway	2/97	0.00755121	0.0816475	16.7394	81.7893	EP300;MAPK3
Melanogenesis	2/101	0.00816312	0.0855891	16.0598	77.2176	EP300;MAPK3
Interleukin-4 signaling pathway	2/104	0.00863628	0.0878869	15.5851	74.057	EP300;MAPK3
Lipid metabolism regulation by peroxisome proliferator-activated receptor alpha (PPAR-alpha)	2/112	0.00995684	0.0932382	14.4458	66.5879	EP300;SREBF2
Oocyte meiosis	2/113	0.0101279	0.0932382	14.315	65.7409	PPP3CA;MAPK3
Fas signaling pathway	2/115	0.0104738	0.0932382	14.0602	64.0986	CSNK1A1;MAPK3
Gene expression regulation in early pancreatic precursor cells	1/8	0.0107509	0.0932382	109.703	497.26	NR5A2
SREBP control of lipid biosynthesis	1/8	0.0107509	0.0932382	109.703	497.26	SREBF2
p53 activity regulation	2/118	0.0110025	0.0932382	13.6945	61.757	CSNK1A1;EP300
Gene expression regulation by hypoxia-inducible factor	1/9	0.0120869	0.0932382	95.9856	423.837	EP300
MAP kinase pathway regulation through dual specificity phosphatases	1/9	0.0120869	0.0932382	95.9856	423.837	MAPK3
PPAR-gamma coactivator role in obesity and thermogenesis	1/9	0.0120869	0.0932382	95.9856	423.837	EP300
Spliceosome	2/127	0.0126581	0.0932382	12.7027	55.504	NHP2L1;SF3B1
Activation of the AP-1 family of transcription factors	1/10	0.0134212	0.0932382	85.3162	367.792	MAPK3
Splicing regulation through Sam68	1/10	0.0134212	0.0932382	85.3162	367.792	MAPK3
Natural killer cell-mediated cytotoxicity	2/137	0.0146172	0.0932382	11.7559	49.675	PPP3CA;MAPK3
Osteopontin signaling	1/11	0.0147537	0.0932382	76.7808	323.728	MAPK3
Capped intron-containing pre-mRNA processing	2/138	0.0148199	0.0932382	11.6688	49.1466	NHP2L1;SF3B1
T cell receptor signaling pathway	2/139	0.0150239	0.0932382	11.5831	48.6271	PPP3CA;MAPK3
ERK inactivation	1/12	0.0160845	0.0932382	69.7972	288.255	MAPK3
Advanced glycosylation endproduct receptor signaling	1/13	0.0174136	0.0932382	63.9776	259.141	MAPK3
Signal attenuation	1/13	0.0174136	0.0932382	63.9776	259.141	MAPK3
MAP kinase downregulation by phosphorylation of MEK1 by Cdk5/p35	1/13	0.0174136	0.0932382	63.9776	259.141	MAPK3
Developmental biology	3/420	0.018511	0.0932382	5.86211	23.3863	NR5A2;EP300;MAPK3
S1P/S1P4 pathway	1/14	0.0187409	0.0932382	59.0533	234.857	MAPK3
CARM1 transcriptional regulation by protein methylation	1/14	0.0187409	0.0932382	59.0533	234.857	EP300
T cell receptor/Ras pathway	1/14	0.0187409	0.0932382	59.0533	234.857	MAPK3
TRAF3-dependent IRF activation pathway	1/14	0.0187409	0.0932382	59.0533	234.857	EP300
Arf6 vesicle-mediated transport	1/15	0.0200666	0.0932382	54.8324	214.324	MAPK3
Repression of pain sensation by the transcriptional regulator DREAM	1/15	0.0200666	0.0932382	54.8324	214.324	MAPK3
Calcium signaling by HBx of hepatitis B virus	1/15	0.0200666	0.0932382	54.8324	214.324	MAPK3
Signaling to p38 via RIT and RIN	1/15	0.0200666	0.0932382	54.8324	214.324	MAPK3
Acetylation and deacetylation of RelA in the nucleus	1/16	0.0213905	0.0932382	51.1744	196.756	EP300
Hypoxia-inducible factor in the cardivascular system	1/16	0.0213905	0.0932382	51.1744	196.756	EP300
Inhibition of platelet activation by aspirin	1/16	0.0213905	0.0932382	51.1744	196.756	MAPK3
SREBF and miR-33 in cholesterol and lipid homeostasis	1/16	0.0213905	0.0932382	51.1744	196.756	SREBF2
Serotonin receptor 2 and ELK-SRF/GATA4 signaling	1/16	0.0213905	0.0932382	51.1744	196.756	MAPK3
Interleukin-9 signaling pathway	1/16	0.0213905	0.0932382	51.1744	196.756	MAPK3
Sprouty regulation of FGF signaling	1/16	0.0213905	0.0932382	51.1744	196.756	MAPK3
Alzheimer's disease	2/169	0.0216938	0.0932382	9.4879	36.3456	PPP3CA;MAPK3
Fatty acid, triacylglycerol, and ketone body metabolism	2/173	0.0226612	0.0932382	9.26409	35.0841	EP300;SREBF2
SHC-related events	1/17	0.0227126	0.0932382	47.9736	181.572	MAPK3
SHC1 events in EGFR signaling	1/17	0.0227126	0.0932382	47.9736	181.572	MAPK3
Beta-arrestin-dependent recruitment of Src kinases in GPCR signaling	1/17	0.0227126	0.0932382	47.9736	181.572	MAPK3
Beta-catenin phosphorylation cascade	1/17	0.0227126	0.0932382	47.9736	181.572	CSNK1A1
Cadmium-induced DNA biosynthesis and proliferation in macrophages	1/17	0.0227126	0.0932382	47.9736	181.572	MAPK3
Endocytotic role of NDK, phosphins and dynamin	1/17	0.0227126	0.0932382	47.9736	181.572	PPP3CA
Human cytomegalovirus and MAP kinase pathways	1/18	0.0240331	0.0932382	45.1493	168.331	MAPK3
Serotonin receptor 4/6/7 and NR3C signaling	1/18	0.0240331	0.0932382	45.1493	168.331	MAPK3
PTEN-dependent cell cycle arrest and apoptosis	1/19	0.0253518	0.0932382	42.6389	156.694	MAPK3
G-protein-independent seven transmembrane receptor signaling	1/19	0.0253518	0.0932382	42.6389	156.694	MAPK3
STAT3 pathway	1/19	0.0253518	0.0932382	42.6389	156.694	MAPK3
Calcineurin in effects in keratinocyte differentiation	1/19	0.0253518	0.0932382	42.6389	156.694	PPP3CA
MAL role in Rho-mediated activation of SRF	1/19	0.0253518	0.0932382	42.6389	156.694	MAPK3
Mitochondrial gene expression	1/19	0.0253518	0.0932382	42.6389	156.694	PPP3CA
FRS2-mediated activation	1/19	0.0253518	0.0932382	42.6389	156.694	MAPK3
TGF-beta signaling pathway	2/185	0.0256688	0.0932382	8.65137	31.6854	EP300;MAPK3
Sprouty regulation of tyrosine kinase signals	1/20	0.0266688	0.0932382	40.3927	146.394	MAPK3
N-glycan antennae elongation in the medial/trans-Golgi	1/20	0.0266688	0.0932382	40.3927	146.394	MGAT3
Nerve growth factor (NGF) pathway	1/20	0.0266688	0.0932382	40.3927	146.394	MAPK3
IGF1 signaling pathway	1/21	0.0279842	0.0932382	38.3712	137.22	MAPK3
S1P/S1P1 pathway	1/21	0.0279842	0.0932382	38.3712	137.22	MAPK3
CCR3 signaling in eosinophils	1/22	0.0292977	0.0932382	36.5421	129.003	MAPK3
Nitric oxide signaling pathway	1/22	0.0292977	0.0932382	36.5421	129.003	PPP3CA
Messenger RNA processing	2/203	0.0304673	0.0932382	7.86945	27.4731	NHP2L1;SF3B1
Progesterone-initiated oocyte maturation	1/23	0.0306096	0.0932382	34.8794	121.605	MAPK3
Hypoxia and p53 in the cardiovascular system	1/23	0.0306096	0.0932382	34.8794	121.605	EP300
BAD phosphorylation mediated by IGF1R signaling	1/23	0.0306096	0.0932382	34.8794	121.605	MAPK3
CREB transcription factor and its extracellular signals	1/23	0.0306096	0.0932382	34.8794	121.605	MAPK3
Signaling events mediated by PRL	1/23	0.0306096	0.0932382	34.8794	121.605	MAPK3
Collagen binding in corneal epithelia mediated by Erk and PI-3 Kinase	1/23	0.0306096	0.0932382	34.8794	121.605	MAPK3
Mitochondrial pathway of apoptosis: antiapoptotic Bcl-2 family	1/23	0.0306096	0.0932382	34.8794	121.605	MAPK3
Ras-independent pathway in NK cell-mediated cytotoxicity	1/24	0.0319198	0.0932382	33.3612	114.914	MAPK3
Inhibition of cellular proliferation by Gleevec	1/24	0.0319198	0.0932382	33.3612	114.914	MAPK3
SREBP signaling	1/24	0.0319198	0.0932382	33.3612	114.914	SREBF2
Signal transduction of S1P receptor	1/24	0.0319198	0.0932382	33.3612	114.914	MAPK3
Cholesterol biosynthesis	1/24	0.0319198	0.0932382	33.3612	114.914	SREBF2
Dorso-ventral axis formation	1/24	0.0319198	0.0932382	33.3612	114.914	MAPK3
Antigen-activated B-cell receptor generation of second messengers	2/211	0.0327064	0.0932382	7.56517	25.8743	PPP3CA;MAPK3
IGF1 receptor signaling through beta-arrestin	1/25	0.0332283	0.0932382	31.9696	108.836	MAPK3
SHC1 events in ERBB2 signaling	1/25	0.0332283	0.0932382	31.9696	108.836	MAPK3
Cellular response to hypoxia	1/25	0.0332283	0.0932382	31.9696	108.836	EP300
Ck1/Cdk5 regulation by type 1 glutamate receptors	1/25	0.0332283	0.0932382	31.9696	108.836	PPP3CA
Maturity onset diabetes of the young	1/25	0.0332283	0.0932382	31.9696	108.836	NR5A2
TPO signaling pathway	1/25	0.0332283	0.0932382	31.9696	108.836	MAPK3
DARPP-32 events	1/25	0.0332283	0.0932382	31.9696	108.836	PPP3CA
ALK1 pathway	1/26	0.0345351	0.0932382	30.6892	103.293	MAPK3
Physiological and pathological hypertrophy of the heart	1/26	0.0345351	0.0932382	30.6892	103.293	PPP3CA
Ras signaling pathway	1/26	0.0345351	0.0932382	30.6892	103.293	MAPK3
Inhibition of activated T cell apoptosis by neuropeptides VIP and PACAP	1/26	0.0345351	0.0932382	30.6892	103.293	PPP3CA
Selenoamino acid metabolism	1/26	0.0345351	0.0932382	30.6892	103.293	SEPHS2
CARM1 and regulation of the estrogen receptor	1/26	0.0345351	0.0932382	30.6892	103.293	EP300
PGC-1a regulation	1/26	0.0345351	0.0932382	30.6892	103.293	PPP3CA
RORA activates circadian expression	1/27	0.0358401	0.0932382	29.5074	98.2209	EP300
BAD phosphorylation regulation	1/27	0.0358401	0.0932382	29.5074	98.2209	MAPK3
Cell cycle: G2/M checkpoint	1/27	0.0358401	0.0932382	29.5074	98.2209	EP300
Mammalian calpain regulation of cell motility	1/27	0.0358401	0.0932382	29.5074	98.2209	MAPK3
Control of gene expression by vitamin D receptor	1/27	0.0358401	0.0932382	29.5074	98.2209	EP300
ERK5 role in neuronal survival pathway	1/27	0.0358401	0.0932382	29.5074	98.2209	MAPK3
VEGFR1 pathway	1/27	0.0358401	0.0932382	29.5074	98.2209	MAPK3
eIF4E and p70 S6 kinase regulation	1/27	0.0358401	0.0932382	29.5074	98.2209	MAPK3
FSH signaling pathway	1/27	0.0358401	0.0932382	29.5074	98.2209	MAPK3
TRAIL signaling pathway	1/28	0.0371435	0.0950145	28.4131	93.5634	MAPK3
Multi-step regulation of transcription by PITX2	1/28	0.0371435	0.0950145	28.4131	93.5634	EP300
Influence of Ras and Rho proteins on G1 to S transition	1/29	0.0384452	0.0950145	27.397	89.2737	MAPK3
S1P/S1P3 pathway	1/29	0.0384452	0.0950145	27.397	89.2737	MAPK3
Skeletal myogenesis control by HDAC and calcium/calmodulin-dependent kinase (CaMK)	1/29	0.0384452	0.0950145	27.397	89.2737	PPP3CA
T cell receptor calcium pathway	1/29	0.0384452	0.0950145	27.397	89.2737	PPP3CA
Thyroid cancer	1/29	0.0384452	0.0950145	27.397	89.2737	MAPK3
Gene expression	4/968	0.039433	0.0954988	3.42937	11.0877	NR5A2;NHP2L1;SF3B1;MAPK3
TRAF6-mediated IRF7 activation	1/30	0.0397452	0.0954988	26.4509	85.3113	EP300
Nuclear events mediated by MAP kinases	1/30	0.0397452	0.0954988	26.4509	85.3113	MAPK3
PDGFA signaling pathway	1/30	0.0397452	0.0954988	26.4509	85.3113	MAPK3
Alpha-6 beta-4 integrin signaling pathway	1/31	0.0410434	0.0957494	25.5679	81.6416	MAPK3
Alpha-V beta-3 integrin/OPN pathway	1/31	0.0410434	0.0957494	25.5679	81.6416	MAPK3
RNA polymerase I promoter opening	1/31	0.0410434	0.0957494	25.5679	81.6416	MAPK3
NF-kappaB activation by non-typeable Hemophilus influenzae	1/31	0.0410434	0.0957494	25.5679	81.6416	EP300
Pancreatic beta-cell development regulation	1/32	0.04234	0.0957494	24.7419	78.2345	NR5A2
Alpha-synuclein signaling	1/32	0.04234	0.0957494	24.7419	78.2345	MAPK3
Hypothetical network for drug addiction	1/32	0.04234	0.0957494	24.7419	78.2345	MAPK3
Serotonin HTR1 group and FOS pathway	1/32	0.04234	0.0957494	24.7419	78.2345	MAPK3
Netrin-mediated signaling events	1/32	0.04234	0.0957494	24.7419	78.2345	MAPK3
Syndecan 2 pathway	1/33	0.043635	0.098037	23.9675	75.0639	MAPK3
HIF-2-alpha transcription factor network	1/34	0.0449282	0.098387	23.2401	72.1068	EP300
MAPK/TRK pathway	1/34	0.0449282	0.098387	23.2401	72.1068	MAPK3
EGF receptor transactivation by GPCRs in cardiac hypertrophy	1/34	0.0449282	0.098387	23.2401	72.1068	MAPK3
EPO receptor signaling	1/34	0.0449282	0.098387	23.2401	72.1068	MAPK3
Prion diseases	1/35	0.0462197	0.0993293	22.5554	69.3433	MAPK3
Signal transduction by L1	1/35	0.0462197	0.0993293	22.5554	69.3433	MAPK3
EGF receptor (ErbB1) signaling pathway	1/35	0.0462197	0.0993293	22.5554	69.3433	MAPK3
GM-CSF-mediated signaling events	1/36	0.0475096	0.0996261	21.9099	66.7556	MAPK3
Phospholipids as signaling intermediaries	1/36	0.0475096	0.0996261	21.9099	66.7556	MAPK3
Signaling to ERKs	1/36	0.0475096	0.0996261	21.9099	66.7556	MAPK3
Transport to the Golgi and subsequent modification	1/36	0.0475096	0.0996261	21.9099	66.7556	MGAT3
FRA pathway	1/37	0.0487978	0.10134	21.3002	64.3282	EP300
BMAL1-CLOCK/NPAS2 activates circadian expression	1/38	0.0500843	0.10134	20.7235	62.0471	EP300
Signaling of hepatocyte growth factor receptor	1/38	0.0500843	0.10134	20.7235	62.0471	MAPK3
Trefoil factor initiation of mucosal healing	1/38	0.0500843	0.10134	20.7235	62.0471	MAPK3
ERBB4 signaling events	1/38	0.0500843	0.10134	20.7235	62.0471	MAPK3
Nuclear receptors	1/38	0.0500843	0.10134	20.7235	62.0471	NR5A2
Angiotensin II-mediated activation of JNK pathway via Pyk2-dependent signaling	1/39	0.0513691	0.102148	20.1771	59.9002	MAPK3
Signaling events regulated by Ret tyrosine kinase	1/39	0.0513691	0.102148	20.1771	59.9002	MAPK3
FRS2-mediated cascade	1/39	0.0513691	0.102148	20.1771	59.9002	MAPK3
Negative regulation of FGFR signaling	1/40	0.0526522	0.104101	19.6588	57.8764	MAPK3
Bioactive peptide-induced signaling pathway	1/41	0.0539337	0.10543	19.1663	55.9657	MAPK3
FOXM1 transcription factor network	1/41	0.0539337	0.10543	19.1663	55.9657	EP300
Aldosterone-regulated sodium reabsorption	1/42	0.0552135	0.106133	18.6979	54.1595	MAPK3
Bladder cancer	1/42	0.0552135	0.106133	18.6979	54.1595	MAPK3
TWEAK signaling pathway	1/42	0.0552135	0.106133	18.6979	54.1595	MAPK3
Growth hormone receptor signaling	1/43	0.0564917	0.10799	18.2518	52.4496	MAPK3
Gastrin pathway	1/44	0.0577681	0.108629	17.8265	50.829	SREBF2
HNF3A pathway	1/44	0.0577681	0.108629	17.8265	50.829	EP300
ERBB2/ERBB3 signaling events	1/44	0.0577681	0.108629	17.8265	50.829	MAPK3
Interleukin-12/STAT4 pathway	1/45	0.059043	0.109833	17.4205	49.291	PPP3CA
Interleukin-3 signaling pathway	1/45	0.059043	0.109833	17.4205	49.291	MAPK3
Syndecan 1 pathway	1/46	0.0603161	0.111601	17.0325	47.8299	MAPK3
Agrin in postsynaptic differentiation	1/47	0.0615876	0.112748	16.6614	46.4402	MAPK3
Regulation of transcription by NOTCH1 intracellular domain	1/47	0.0615876	0.112748	16.6614	46.4402	EP300
HES/HEY pathway	1/48	0.0628574	0.113782	16.3061	45.117	EP300
N-glycan biosynthesis	1/48	0.0628574	0.113782	16.3061	45.117	MGAT3
G alpha 12 pathway	1/49	0.0641256	0.113782	15.9655	43.8559	MAPK3
Angiopoietin receptor Tie2-mediated signaling	1/49	0.0641256	0.113782	15.9655	43.8559	MAPK3
Interleukin-5 signaling pathway	1/49	0.0641256	0.113782	15.9655	43.8559	MAPK3
Ceramide signaling pathway	1/49	0.0641256	0.113782	15.9655	43.8559	MAPK3
Type 2 diabetes mellitus	1/50	0.0653922	0.115437	15.6389	42.6529	MAPK3
Nuclear receptor transcription pathway	1/51	0.066657	0.116523	15.3254	41.5041	NR5A2
MAPK signaling pathway	2/314	0.0666806	0.116523	5.04128	13.651	PPP3CA;MAPK3
Interleukin-2 receptor beta chain in T cell activation	1/52	0.0679203	0.116765	15.0241	40.4062	MAPK3
Signaling events mediated by stem cell factor receptor (c-Kit)	1/52	0.0679203	0.116765	15.0241	40.4062	MAPK3
Endometrial cancer	1/52	0.0679203	0.116765	15.0241	40.4062	MAPK3
Innate immune system	2/319	0.0685447	0.116765	4.9605	13.2955	EP300;MAPK3
Amyotrophic lateral sclerosis (ALS)	1/53	0.0691818	0.116765	14.7345	39.356	PPP3CA
Androgen receptor regulation of biosynthesis and transcription	1/53	0.0691818	0.116765	14.7345	39.356	EP300
Thrombin signaling through protease-activated receptors	1/53	0.0691818	0.116765	14.7345	39.356	MAPK3
RANKL signaling pathway	1/54	0.0704418	0.117217	14.4557	38.3506	MAPK3
Non-small cell lung cancer	1/54	0.0704418	0.117217	14.4557	38.3506	MAPK3
Pathways in cancer	2/325	0.0708047	0.117217	4.86687	12.8867	EP300;MAPK3
Axon guidance	2/325	0.0708047	0.117217	4.86687	12.8867	PPP3CA;MAPK3
RNA polymerase I transcription	1/55	0.0717001	0.117575	14.1873	37.3873	MAPK3
TAp63 pathway	1/55	0.0717001	0.117575	14.1873	37.3873	EP300
Acute myeloid leukemia	1/57	0.0742118	0.119987	13.6793	35.5775	MAPK3
Pre-NOTCH expression and processing	1/57	0.0742118	0.119987	13.6793	35.5775	EP300
Keratinocyte differentiation	1/57	0.0742118	0.119987	13.6793	35.5775	MAPK3
RAGE pathway	1/60	0.077967	0.123746	12.9817	33.1225	SREBF2
Natural killer cell receptor signaling pathway	1/60	0.077967	0.123746	12.9817	33.1225	MAPK3
Neurotrophic factor-mediated Trk receptor signaling	1/60	0.077967	0.123746	12.9817	33.1225	MAPK3
Ephrin receptor B forward pathway	1/60	0.077967	0.123746	12.9817	33.1225	MAPK3
Leptin signaling pathway	1/61	0.0792155	0.124584	12.7647	32.3661	MAPK3
FGF signaling pathway	1/61	0.0792155	0.124584	12.7647	32.3661	MAPK3
Shigellosis	1/62	0.0804624	0.124843	12.5549	31.6378	MAPK3
Circadian rhythm	1/62	0.0804624	0.124843	12.5549	31.6378	EP300
Colorectal cancer	1/62	0.0804624	0.124843	12.5549	31.6378	MAPK3
Angiotensin II-stimulated signaling through G-proteins and beta-arrestin	1/64	0.0829512	0.126996	12.1551	30.2601	MAPK3
Validated nuclear estrogen receptor alpha network	1/64	0.0829512	0.126996	12.1551	30.2601	EP300
Endothelins	1/64	0.0829512	0.126996	12.1551	30.2601	MAPK3
Glioma	1/65	0.0841932	0.127209	11.9645	29.608	MAPK3
Interleukin-12-mediated signaling events	1/65	0.0841932	0.127209	11.9645	29.608	PPP3CA
ERK1/ERK2 MAPK pathway	1/65	0.0841932	0.127209	11.9645	29.608	MAPK3
HIF-1 transcriptional activity in hypoxia	1/66	0.0854336	0.127414	11.7799	28.9787	EP300
Retinoblastoma protein regulation	1/66	0.0854336	0.127414	11.7799	28.9787	EP300
Thyroid-stimulating hormone signaling pathway	1/66	0.0854336	0.127414	11.7799	28.9787	MAPK3
SIDS susceptibility pathways	1/67	0.0866723	0.127611	11.6008	28.3712	EP300
Telomerase regulation	1/67	0.0866723	0.127611	11.6008	28.3712	MAPK3
cAMP cell motility pathway inferred from amoeba model	1/67	0.0866723	0.127611	11.6008	28.3712	MAPK3
Messenger RNA splicing: major pathway	1/68	0.0879095	0.127637	11.4271	27.7844	NHP2L1
Pancreatic cancer	1/70	0.0903789	0.127637	11.0948	26.669	MAPK3
AP-1 transcription factor network	1/70	0.0903789	0.127637	11.0948	26.669	EP300
Antiviral mechanism by interferon-stimulated genes	1/70	0.0903789	0.127637	11.0948	26.669	MAPK3
Hedgehog signaling pathway	1/70	0.0903789	0.127637	11.0948	26.669	CSNK1A1
CDC42 signaling events	1/70	0.0903789	0.127637	11.0948	26.669	MAPK3
Signaling events mediated by HDAC class I	1/70	0.0903789	0.127637	11.0948	26.669	EP300
Signaling events mediated by VEGFR1 and VEGFR2	1/70	0.0903789	0.127637	11.0948	26.669	MAPK3
Long-term depression	1/70	0.0903789	0.127637	11.0948	26.669	MAPK3
NCAM signaling for neurite out-growth	1/70	0.0903789	0.127637	11.0948	26.669	MAPK3
Interleukin-6 signaling pathway	1/71	0.0916112	0.128301	10.9357	26.1386	MAPK3
Melanoma	1/71	0.0916112	0.128301	10.9357	26.1386	MAPK3
Leishmaniasis	1/72	0.0928419	0.128301	10.7811	25.6253	MAPK3
Myocyte adrenergic pathway	1/72	0.0928419	0.128301	10.7811	25.6253	PPP3CA
Signaling by NOTCH1	1/73	0.094071	0.128301	10.6309	25.1283	EP300
Chronic myeloid leukemia	1/73	0.094071	0.128301	10.6309	25.1283	MAPK3
Degradation of beta-catenin by the destruction complex	1/73	0.094071	0.128301	10.6309	25.1283	CSNK1A1
Myc repressed pathway	1/73	0.094071	0.128301	10.6309	25.1283	EP300
Integrins in angiogenesis	1/74	0.0952984	0.128301	10.4847	24.6469	MAPK3
Seven transmembrane receptor signaling through beta-arrestin	1/74	0.0952984	0.128301	10.4847	24.6469	MAPK3
E2F transcription factor network	1/74	0.0952984	0.128301	10.4847	24.6469	EP300
Wnt/calcium/cyclic GMP pathway	1/74	0.0952984	0.128301	10.4847	24.6469	PPP3CA
Prolactin activation of MAPK signaling	1/75	0.0965243	0.129447	10.3425	24.1804	MAPK3
RIG-I/MDA5-mediated induction of interferon-alpha/beta pathways	1/76	0.0977486	0.130583	10.2041	23.7282	EP300
Transcriptional regulation of white adipocyte differentiation	1/77	0.0989713	0.131708	10.0693	23.2896	EP300
Signaling by SCF-KIT	1/78	0.100192	0.132822	9.93806	22.8641	MAPK3
Signaling events mediated by hepatocyte growth factor receptor (c-Met)	1/79	0.101412	0.132911	9.81016	22.4512	MAPK3
p73 transcription factor network	1/79	0.101412	0.132911	9.81016	22.4512	EP300
Fc epsilon receptor I signaling pathway	1/79	0.101412	0.132911	9.81016	22.4512	MAPK3
Apoptosis modulation and signaling	1/80	0.10263	0.132996	9.68549	22.0503	MAPK3
Nuclear beta-catenin signaling and target gene transcription regulation	1/80	0.10263	0.132996	9.68549	22.0503	EP300
Opioid signaling	1/80	0.10263	0.132996	9.68549	22.0503	PPP3CA
MAP kinase signaling pathway	1/81	0.103846	0.13407	9.56394	21.6609	MAPK3
SMAD2/3 nuclear pathway	1/82	0.105061	0.135134	9.44539	21.2825	EP300
Asparagine N-linked glycosylation	1/85	0.108695	0.138267	9.10668	20.2096	MGAT3
Myc active pathway	1/85	0.108695	0.138267	9.10668	20.2096	EP300
NOD signaling pathway	1/85	0.108695	0.138267	9.10668	20.2096	MAPK3
Progesterone-mediated oocyte maturation	1/86	0.109904	0.139292	8.9991	19.8713	MAPK3
HIF-1 degradation in normoxia	1/88	0.112316	0.141314	8.79134	19.2217	MAPK3
Androgen receptor signaling, proteolysis, and transcription regulation	1/88	0.112316	0.141314	8.79134	19.2217	EP300
Gap junction pathway	1/90	0.114722	0.143818	8.59291	18.6058	MAPK3
Signaling by ERBB4	1/93	0.118319	0.147686	8.31145	17.7398	MAPK3
L1CAM interactions	1/94	0.119514	0.147686	8.22167	17.4654	MAPK3
ERBB signaling pathway	1/94	0.119514	0.147686	8.22167	17.4654	MAPK3
Fc gamma receptor-mediated phagocytosis	1/94	0.119514	0.147686	8.22167	17.4654	MAPK3
G-protein signaling pathways	1/95	0.120709	0.148104	8.1338	17.1979	PPP3CA
RNA polymerase I, RNA polymerase III, and mitochondrial transcription	1/95	0.120709	0.148104	8.1338	17.1979	MAPK3
Mitochondrial pathway of apoptosis: BH3-only Bcl-2 family	1/97	0.123093	0.150495	7.96354	16.6822	PPP3CA
Wnt signaling pathway and pluripotency	1/98	0.124282	0.151414	7.88105	16.4336	EP300
GnRH signaling pathway	1/101	0.127842	0.154661	7.64346	15.7223	MAPK3
TNF-alpha signaling pathway	1/101	0.127842	0.154661	7.64346	15.7223	MAPK3
Signaling by ERBB2	1/102	0.129025	0.155549	7.5674	15.4961	MAPK3
Hemostasis pathway	2/468	0.130892	0.157253	3.34884	6.80947	EP300;MAPK3
Chagas disease	1/104	0.131387	0.157301	7.41972	15.0591	MAPK3
Fibroblast growth factor receptor pathway	1/105	0.132566	0.158165	7.348	14.8479	MAPK3
ERBB1 downstream pathway	1/106	0.133743	0.159021	7.27766	14.6414	MAPK3
G alpha i pathway	1/108	0.136093	0.161261	7.14091	14.2419	MAPK3
Signaling by insulin receptor	1/109	0.137265	0.161544	7.07443	14.0487	MAPK3
Signaling by interleukins	1/109	0.137265	0.161544	7.07443	14.0487	MAPK3
Signaling by EGFR in cancer	1/111	0.139606	0.163188	6.9451	13.6744	MAPK3
Epidermal growth factor receptor (EGFR) pathway	1/111	0.139606	0.163188	6.9451	13.6744	MAPK3
Lipid and lipoprotein metabolism	2/489	0.140523	0.163707	3.20099	6.28157	EP300;SREBF2
mTOR signaling pathway	1/113	0.141941	0.164804	6.8204	13.3158	MAPK3
CXCR4 signaling pathway	1/116	0.145431	0.16773	6.64147	12.8051	MAPK3
Vascular smooth muscle contraction	1/116	0.145431	0.16773	6.64147	12.8051	MAPK3
Signaling by NOTCH	1/119	0.148908	0.171169	6.47164	12.3248	EP300
G alpha s pathway	1/120	0.150063	0.171927	6.41694	12.171	MAPK3
Notch signaling pathway	1/121	0.151218	0.172678	6.36314	12.0202	EP300
Signaling by PDGF	1/122	0.152371	0.173422	6.31024	11.8723	MAPK3
Interleukin-1 signaling pathway	1/125	0.15582	0.176189	6.15664	11.4455	MAPK3
Factors involved in megakaryocyte development and platelet production	1/125	0.15582	0.176189	6.15664	11.4455	EP300
Signal transduction	3/1020	0.156836	0.176333	2.32989	4.31625	CSNK1A1;EP300;MAPK3
Neurotrophin signaling pathway	1/126	0.156967	0.176333	6.10708	11.3086	MAPK3
Signaling by FGFR in disease	1/128	0.159256	0.178325	6.0103	11.0424	MAPK3
PDGFB signaling pathway	1/129	0.160398	0.179025	5.96304	10.9129	MAPK3
NGF signaling via TRKA from the plasma membrane	1/136	0.168353	0.187299	5.65185	10.0699	MAPK3
Adrenergic pathway	1/137	0.169483	0.187952	5.61001	9.95778	MAPK3
p53 signaling pathway	1/139	0.17174	0.189846	5.52815	9.73936	EP300
Toll-like receptor signaling pathway regulation	1/142	0.175113	0.192959	5.40971	9.42547	MAPK3
Interleukin-5 regulation of apoptosis	1/144	0.177355	0.194809	5.33351	9.22486	MAPK3
Integrated breast cancer pathway	1/152	0.186263	0.203303	5.0489	8.48517	EP300
EGFR1 pathway	1/152	0.186263	0.203303	5.0489	8.48517	CORO1A
Phagosome	1/154	0.188475	0.205071	4.9824	8.31458	CORO1A
Integrin signaling pathway	1/155	0.189579	0.205625	4.9498	8.23126	MAPK3
Toll receptor cascades	1/159	0.193981	0.209742	4.82352	7.91054	MAPK3
Interferon signaling	1/168	0.203801	0.219673	4.56149	7.25556	MAPK3
Calcium signaling pathway	1/178	0.214577	0.23057	4.30161	6.62055	PPP3CA
Transcription	1/181	0.217782	0.23329	4.22927	6.44651	MAPK3
Huntington's disease	1/184	0.220975	0.23598	4.15931	6.27933	EP300
Chemokine signaling pathway	1/189	0.226268	0.240889	4.04767	6.01497	MAPK3
Post-translational protein modification	1/196	0.233621	0.247953	3.90099	5.67225	MGAT3
Jak-STAT signaling pathway	1/199	0.236751	0.250508	3.8413	5.53433	EP300
Platelet activation, signaling and aggregation	1/205	0.242975	0.256309	3.72719	5.27321	MAPK3
Gastrin-CREB signaling pathway via PKC and MAPK	1/206	0.244008	0.256616	3.70882	5.23149	MAPK3
Signaling by NGF	1/221	0.259335	0.271908	3.45332	4.66073	MAPK3
Actin cytoskeleton regulation	1/226	0.264377	0.276357	3.37573	4.491	MAPK3
Focal adhesion	1/233	0.27138	0.282824	3.27271	4.26839	MAPK3
Apoptosis	1/242	0.28029	0.291232	3.14906	4.00538	PPP3CA
FSH regulation of apoptosis	1/263	0.300674	0.311477	2.89357	3.47728	CSNK1A1
Insulin signaling pathway	1/277	0.313953	0.324262	2.74484	3.17993	MAPK3
Immune system signaling by interferons, interleukins, prolactin, and growth hormones	1/280	0.316767	0.326195	2.71492	3.12104	MAPK3
Metabolism	3/1615	0.373939	0.383925	1.42377	1.40052	MGAT3;EP300;SEPHS2
Signaling by GPCR	2/977	0.382733	0.391791	1.55881	1.49711	PPP3CA;MAPK3
Immune system	2/998	0.393002	0.401117	1.52426	1.42357	EP300;MAPK3
Generic transcription pathway	1/377	0.401988	0.409082	2.0046	1.82686	NR5A2
Protein metabolism	1/442	0.453263	0.459909	1.70347	1.34793	MGAT3
Cell cycle	1/453	0.461511	0.466909	1.66108	1.28443	EP300
TGF-beta regulation of extracellular matrix	1/565	0.538946	0.54366	1.32358	0.818158	SREBF2
T cell receptor regulation of apoptosis	1/603	0.562692	0.565964	1.23761	0.71165	MAPK3
Disease	1/674	0.603942	0.605693	1.10298	0.556208	MAPK3
Interleukin-2 signaling pathway	1/847	0.689367	0.689367	0.869567	0.323463	MAPK3

## Sheet: Results KEGG 2019 Human
Term	Overlap	P-value	Adjusted P-value	Odds Ratio	Combined Score	Genes
Tuberculosis	4/179	9.26925e-05	0.00605244	19.675	182.707	PPP3CA;EP300;CORO1A;MAPK3
Long-term potentiation	3/67	9.92204e-05	0.00605244	38.8848	358.446	PPP3CA;EP300;MAPK3
Wnt signaling pathway	3/158	0.00123098	0.0500598	15.9823	107.08	PPP3CA;CSNK1A1;EP300
Kaposi sarcoma-associated herpesvirus infection	3/186	0.0019641	0.0573697	13.5178	84.2525	PPP3CA;EP300;MAPK3
VEGF signaling pathway	2/59	0.00286379	0.0573697	27.9523	163.678	PPP3CA;MAPK3
Human T-cell leukemia virus 1 infection	3/219	0.00312013	0.0573697	11.4334	65.9697	PPP3CA;EP300;MAPK3
Renal cell carcinoma	2/69	0.00389416	0.0573697	23.7684	131.873	EP300;MAPK3
B cell receptor signaling pathway	2/71	0.00411805	0.0573697	23.0771	126.748	PPP3CA;MAPK3
Adherens junction	2/72	0.00423219	0.0573697	22.7463	124.309	EP300;MAPK3
TGF-beta signaling pathway	2/90	0.00653318	0.0618237	18.0773	90.9442	EP300;MAPK3
Th1 and Th2 cell differentiation	2/92	0.00681713	0.0618237	17.6738	88.1624	PPP3CA;MAPK3
Prostate cancer	2/97	0.00755121	0.0618237	16.7394	81.7893	EP300;MAPK3
HIF-1 signaling pathway	2/100	0.00800811	0.0618237	16.2245	78.3205	EP300;MAPK3
T cell receptor signaling pathway	2/101	0.00816312	0.0618237	16.0598	77.2176	PPP3CA;MAPK3
Melanogenesis	2/101	0.00816312	0.0618237	16.0598	77.2176	EP300;MAPK3
Glucagon signaling pathway	2/103	0.00847722	0.0618237	15.7402	75.0866	PPP3CA;EP300
C-type lectin receptor signaling pathway	2/104	0.00863628	0.0618237	15.5851	74.057	PPP3CA;MAPK3
Th17 cell differentiation	2/107	0.00912152	0.0618237	15.1375	71.1027	PPP3CA;MAPK3
Human papillomavirus infection	3/330	0.00971083	0.0618643	7.50994	34.8049	CSNK1A1;EP300;MAPK3
Glutamatergic synapse	2/114	0.0103002	0.0618643	14.1864	64.9113	PPP3CA;MAPK3
Thyroid hormone signaling pathway	2/116	0.0106488	0.0618643	13.9361	63.3023	EP300;MAPK3
Oocyte meiosis	2/125	0.0122813	0.0664758	12.9106	56.8024	PPP3CA;MAPK3
Osteoclast differentiation	2/127	0.0126581	0.0664758	12.7027	55.504	PPP3CA;MAPK3
Natural killer cell mediated cytotoxicity	2/131	0.0134268	0.0664758	12.3064	53.0466	PPP3CA;MAPK3
FoxO signaling pathway	2/132	0.0136221	0.0664758	12.2111	52.4595	EP300;MAPK3
Breast cancer	2/147	0.016699	0.0774009	10.9396	44.7693	CSNK1A1;MAPK3
Gastric cancer	2/149	0.0171297	0.0774009	10.7897	43.8809	CSNK1A1;MAPK3
Oxytocin signaling pathway	2/153	0.0180054	0.0784523	10.5017	42.1863	PPP3CA;MAPK3
Cellular senescence	2/160	0.019583	0.0791697	10.0329	39.4604	PPP3CA;MAPK3
Hepatitis B	2/163	0.0202763	0.0791697	9.84447	38.3767	EP300;MAPK3
cGMP-PKG signaling pathway	2/166	0.02098	0.0791697	9.66293	37.3394	PPP3CA;MAPK3
Hepatocellular carcinoma	2/168	0.0214547	0.0791697	9.54554	36.6722	CSNK1A1;MAPK3
Alzheimer disease	2/171	0.0221752	0.0791697	9.37467	35.7061	PPP3CA;MAPK3
Influenza A	2/171	0.0221752	0.0791697	9.37467	35.7061	EP300;MAPK3
Selenocompound metabolism	1/17	0.0227126	0.0791697	47.9736	181.572	SEPHS2
Axon guidance	2/181	0.0246489	0.0835324	8.84648	32.7587	PPP3CA;MAPK3
Viral carcinogenesis	2/201	0.0299176	0.0986471	7.94935	27.8967	EP300;MAPK3
cAMP signaling pathway	2/212	0.0329908	0.103202	7.52876	25.6846	EP300;MAPK3
Human immunodeficiency virus 1 infection	2/212	0.0329908	0.103202	7.52876	25.6846	PPP3CA;MAPK3
Maturity onset diabetes of the young	1/26	0.0345351	0.105332	30.6892	103.293	NR5A2
Human cytomegalovirus infection	2/225	0.0367764	0.109432	7.0852	23.4017	PPP3CA;MAPK3
Prion diseases	1/35	0.0462197	0.134257	22.5554	69.3433	MAPK3
Aldosterone-regulated sodium reabsorption	1/37	0.0487978	0.135303	21.3002	64.3282	MAPK3
Thyroid cancer	1/37	0.0487978	0.135303	21.3002	64.3282	MAPK3
Bladder cancer	1/41	0.0539337	0.14622	19.1663	55.9657	MAPK3
MAPK signaling pathway	2/295	0.0597621	0.153341	5.37338	15.1389	PPP3CA;MAPK3
Type II diabetes mellitus	1/46	0.0603161	0.153341	17.0325	47.8299	MAPK3
Ether lipid metabolism	1/47	0.0615876	0.153341	16.6614	46.4402	GDPD3
Hedgehog signaling pathway	1/47	0.0615876	0.153341	16.6614	46.4402	CSNK1A1
Notch signaling pathway	1/48	0.0628574	0.153372	16.3061	45.117	EP300
N-Glycan biosynthesis	1/50	0.0653922	0.156388	15.6389	42.6529	MGAT3
Amyotrophic lateral sclerosis (ALS)	1/51	0.066657	0.156388	15.3254	41.5041	PPP3CA
Endometrial cancer	1/58	0.0754652	0.173712	13.4386	34.7265	MAPK3
Long-term depression	1/60	0.077967	0.175372	12.9817	33.1225	MAPK3
Central carbon metabolism in cancer	1/65	0.0841932	0.175372	11.9645	29.608	MAPK3
Shigellosis	1/65	0.0841932	0.175372	11.9645	29.608	MAPK3
Acute myeloid leukemia	1/66	0.0854336	0.175372	11.7799	28.9787	MAPK3
Non-small cell lung cancer	1/66	0.0854336	0.175372	11.7799	28.9787	MAPK3
Amphetamine addiction	1/68	0.0879095	0.175372	11.4271	27.7844	PPP3CA
Fc epsilon RI signaling pathway	1/68	0.0879095	0.175372	11.4271	27.7844	MAPK3
Renin secretion	1/69	0.089145	0.175372	11.2585	27.2173	PPP3CA
Prolactin signaling pathway	1/70	0.0903789	0.175372	11.0948	26.669	MAPK3
Melanoma	1/72	0.0928419	0.175372	10.7811	25.6253	MAPK3
Leishmaniasis	1/74	0.0952984	0.175372	10.4847	24.6469	MAPK3
Glioma	1/75	0.0965243	0.175372	10.3425	24.1804	MAPK3
Pancreatic cancer	1/75	0.0965243	0.175372	10.3425	24.1804	MAPK3
Chronic myeloid leukemia	1/76	0.0977486	0.175372	10.2041	23.7282	MAPK3
Pertussis	1/76	0.0977486	0.175372	10.2041	23.7282	MAPK3
ErbB signaling pathway	1/85	0.108695	0.188849	9.10668	20.2096	MAPK3
Colorectal cancer	1/86	0.109904	0.188849	8.9991	19.8713	MAPK3
Salmonella infection	1/86	0.109904	0.188849	8.9991	19.8713	MAPK3
Gap junction	1/88	0.112316	0.190313	8.79134	19.2217	MAPK3
Fc gamma R-mediated phagocytosis	1/91	0.115922	0.192465	8.49701	18.3097	MAPK3
GnRH signaling pathway	1/93	0.118319	0.192465	8.31145	17.7398	MAPK3
IL-17 signaling pathway	1/93	0.118319	0.192465	8.31145	17.7398	MAPK3
Circadian entrainment	1/97	0.123093	0.195596	7.96354	16.6822	MAPK3
Choline metabolism in cancer	1/99	0.12547	0.195596	7.80024	16.1909	MAPK3
Progesterone-mediated oocyte maturation	1/99	0.12547	0.195596	7.80024	16.1909	MAPK3
AGE-RAGE signaling pathway in diabetic complications	1/100	0.126657	0.195596	7.72106	15.9538	MAPK3
Chagas disease (American trypanosomiasis)	1/103	0.130207	0.197892	7.49284	15.2751	MAPK3
Toll-like receptor signaling pathway	1/104	0.131387	0.197892	7.41972	15.0591	MAPK3
Parathyroid hormone synthesis, secretion and action	1/106	0.133743	0.198984	7.27766	14.6414	MAPK3
TNF signaling pathway	1/110	0.138437	0.201358	7.00917	13.8595	MAPK3
Cholinergic synapse	1/112	0.140774	0.201358	6.88219	13.4932	MAPK3
Toxoplasmosis	1/113	0.141941	0.201358	6.8204	13.3158	MAPK3
Serotonergic synapse	1/113	0.141941	0.201358	6.8204	13.3158	MAPK3
Sphingolipid signaling pathway	1/119	0.148908	0.20644	6.47164	12.3248	MAPK3
Neurotrophin signaling pathway	1/119	0.148908	0.20644	6.47164	12.3248	MAPK3
Cell cycle	1/124	0.154672	0.208858	6.207	11.5851	EP300
Platelet activation	1/124	0.154672	0.208858	6.207	11.5851	MAPK3
Autophagy	1/128	0.159256	0.208858	6.0103	11.0424	MAPK3
Pathways in cancer	2/530	0.159761	0.208858	2.94621	5.40359	EP300;MAPK3
Relaxin signaling pathway	1/130	0.161539	0.208858	5.91652	10.7859	MAPK3
Dopaminergic synapse	1/131	0.162678	0.208858	5.87071	10.6611	PPP3CA
Vascular smooth muscle contraction	1/132	0.163816	0.208858	5.8256	10.5386	MAPK3
Spliceosome	1/134	0.166087	0.208858	5.73742	10.3001	SF3B1
Apelin signaling pathway	1/137	0.169483	0.208858	5.61001	9.95778	MAPK3
Estrogen signaling pathway	1/137	0.169483	0.208858	5.61001	9.95778	MAPK3
Insulin signaling pathway	1/137	0.169483	0.208858	5.61001	9.95778	MAPK3
Signaling pathways regulating pluripotency of stem cells	1/139	0.17174	0.209522	5.52815	9.73936	MAPK3
Apoptosis	1/143	0.176235	0.212877	5.37134	9.32433	MAPK3
Adrenergic signaling in cardiomyocytes	1/145	0.178473	0.213289	5.29621	9.12704	MAPK3
Phospholipase D signaling pathway	1/148	0.18182	0.213289	5.18734	8.84304	MAPK3
Retrograde endocannabinoid signaling	1/148	0.18182	0.213289	5.18734	8.84304	MAPK3
mTOR signaling pathway	1/152	0.186263	0.214154	5.0489	8.48517	MAPK3
Phagosome	1/152	0.186263	0.214154	5.0489	8.48517	CORO1A
Cushing syndrome	1/155	0.189579	0.214154	4.9498	8.23126	MAPK3
Hepatitis C	1/155	0.189579	0.214154	4.9498	8.23126	MAPK3
JAK-STAT signaling pathway	1/162	0.197267	0.220795	4.73292	7.68245	EP300
NOD-like receptor signaling pathway	1/178	0.214577	0.237985	4.30161	6.62055	MAPK3
Alcoholism	1/180	0.216715	0.238192	4.25312	6.50374	MAPK3
Calcium signaling pathway	1/188	0.225213	0.245321	4.06952	6.06648	PPP3CA
Chemokine signaling pathway	1/190	0.227323	0.245428	4.02605	5.96412	MAPK3
Huntington disease	1/193	0.230478	0.246652	3.96254	5.81542	EP300
Focal adhesion	1/199	0.236751	0.251162	3.8413	5.53433	MAPK3
Proteoglycans in cancer	1/201	0.238831	0.251185	3.8025	5.44517	MAPK3
Rap1 signaling pathway	1/206	0.244008	0.254436	3.70882	5.23149	MAPK3
Regulation of actin cytoskeleton	1/214	0.25222	0.26077	3.56808	4.91486	MAPK3
Ras signaling pathway	1/232	0.270383	0.2772	3.28705	4.29917	MAPK3
MicroRNAs in cancer	1/299	0.334332	0.339904	2.53936	2.78218	EP300
PI3K-Akt signaling pathway	1/354	0.382759	0.385922	2.13772	2.05296	MAPK3
Herpes simplex virus 1 infection	1/492	0.489798	0.489798	1.52608	1.08926	ZNF688
