# Supplementary material for: Cross-tissue transcriptome-wide association studies of 885,176 individuals and seven diseases of the gut-brain axis identify susceptibility genes shared between schizophrenia and inflammatory bowel disease
Source: Research Square preprint supplement (doi:10.21203/rs.3.rs-590423/v1), 2021-07-15
Supplement: Supplementary file 6 [file 851abc1b68b8d748405d457c.xlsx]

## Sheet: Supplementary Table 11
phenotype_1	phenotype_2	tissue_1	tissue_2	n_all_genes	n_gene_set_1	n_gene_set_2	n_intersected_genes	intersected_genes
all_pvalues_SCZ.info.0.6.maf.0.01.sumstats_wide.tsv	all_pvalues_PSC.sumstats.info04_wide.tsv	GBJ	GBJ	1648	89	150	27	['NKAPL', 'CYP21A2', 'ZKSCAN8', 'HIST1H2BJ', 'IER3', 'ZSCAN31', 'BTN3A2', 'HIST1H3J', 'HIST1H2BK', 'C6orf100', 'ZSCAN12', 'BTN3A1', 'SCAND3', 'PGBD1', 'ZKSCAN4', 'ZNF165', 'HIST1H4L', 'HIST1H4J', 'ZKSCAN3', 'ZNF184', 'TRIM27', 'ZNF391', 'HIST1H2BN', 'ZSCAN9', 'ZSCAN23', 'ABT1', 'HIST1H4K']
all_pvalues_PSC.sumstats.info04_wide.tsv	all_pvalues_MDD.info.0.4.maf.0.01.sumstats_wide.tsv	GBJ	GBJ	1632	150	9	6	['BTN3A2', 'HIST1H4L', 'PRSS16', 'HIST1H2BN', 'ZSCAN23', 'ZSCAN31']
all_pvalues_SCZ.info.0.6.maf.0.01.sumstats_wide.tsv	all_pvalues_PSC.sumstats.info04_wide.tsv	Esophagus_Mucosa	Esophagus_Mucosa	4983	16	36	4	['ZSCAN23', 'TRIM27', 'HIST1H2AL', 'ZKSCAN4']
all_pvalues_SCZ.info.0.6.maf.0.01.sumstats_wide.tsv	all_pvalues_PSC.sumstats.info04_wide.tsv	Esophagus_Gastroesophageal_Junction	Esophagus_Gastroesophageal_Junction	5480	17	28	3	['ZNF391', 'HIST1H2BK', 'ZSCAN23']
all_pvalues_SCZ.info.0.6.maf.0.01.sumstats_wide.tsv	all_pvalues_PSC.sumstats.info04_wide.tsv	Pancreas	Pancreas	5893	14	24	3	['HIST1H2BN', 'ZSCAN9', 'ZSCAN23']
all_pvalues_SCZ.info.0.6.maf.0.01.sumstats_wide.tsv	all_pvalues_CD.sumstats.info04_wide.tsv	GBJ	GBJ	1648	89	215	3	['SF3B1', 'ZC3H7B', 'SGSM3']
all_pvalues_SCZ.info.0.6.maf.0.01.sumstats_wide.tsv	all_pvalues_PSC.sumstats.info04_wide.tsv	Brain_Anterior_cingulate_cortex_BA24	Brain_Anterior_cingulate_cortex_BA24	6514	16	18	2	['ZSCAN12', 'ZSCAN9']
all_pvalues_SCZ.info.0.6.maf.0.01.sumstats_wide.tsv	all_pvalues_PSC.sumstats.info04_wide.tsv	Brain_Cortex	Brain_Cortex	5857	11	18	2	['ZSCAN12', 'ZSCAN9']
all_pvalues_SCZ.info.0.6.maf.0.01.sumstats_wide.tsv	all_pvalues_PSC.sumstats.info04_wide.tsv	Brain_Hypothalamus	Brain_Hypothalamus	5541	18	23	2	['ZSCAN31', 'ZNF165']
all_pvalues_SCZ.info.0.6.maf.0.01.sumstats_wide.tsv	all_pvalues_PSC.sumstats.info04_wide.tsv	Brain_Putamen_basal_ganglia	Brain_Putamen_basal_ganglia	6174	14	20	2	['HIST1H2BN', 'ZKSCAN8']
all_pvalues_SCZ.info.0.6.maf.0.01.sumstats_wide.tsv	all_pvalues_PSC.sumstats.info04_wide.tsv	Colon_Sigmoid	Colon_Sigmoid	5298	14	28	2	['ABT1', 'ZKSCAN8']
all_pvalues_SCZ.info.0.6.maf.0.01.sumstats_wide.tsv	all_pvalues_PSC.sumstats.info04_wide.tsv	Colon_Transverse	Colon_Transverse	4762	14	22	2	['HIST1H4J', 'ZNF165']
all_pvalues_SCZ.info.0.6.maf.0.01.sumstats_wide.tsv	all_pvalues_PSC.sumstats.info04_wide.tsv	Esophagus_Muscularis	Esophagus_Muscularis	5275	16	24	2	['PGBD1', 'ZSCAN23']
all_pvalues_SCZ.info.0.6.maf.0.01.sumstats_wide.tsv	all_pvalues_PSC.sumstats.info04_wide.tsv	Whole_Blood	Whole_Blood	6135	14	26	2	['HIST1H4J', 'ZKSCAN3']
all_pvalues_SCZ.info.0.6.maf.0.01.sumstats_wide.tsv	all_pvalues_PSC.sumstats.info04_wide.tsv	Brain_Caudate_basal_ganglia	Brain_Caudate_basal_ganglia	5671	14	26	1	['ZKSCAN3']
all_pvalues_SCZ.info.0.6.maf.0.01.sumstats_wide.tsv	all_pvalues_PSC.sumstats.info04_wide.tsv	Brain_Cerebellar_Hemisphere	Brain_Cerebellar_Hemisphere	6440	14	27	1	['ZSCAN12']
all_pvalues_SCZ.info.0.6.maf.0.01.sumstats_wide.tsv	all_pvalues_UC.sumstats.info04_wide.tsv	Brain_Frontal_Cortex_BA9	Brain_Frontal_Cortex_BA9	5783	15	24	1	['SATB2']
all_pvalues_SCZ.info.0.6.maf.0.01.sumstats_wide.tsv	all_pvalues_PSC.sumstats.info04_wide.tsv	Brain_Frontal_Cortex_BA9	Brain_Frontal_Cortex_BA9	5783	15	18	1	['ZSCAN23']
all_pvalues_SCZ.info.0.6.maf.0.01.sumstats_wide.tsv	all_pvalues_UC.sumstats.info04_wide.tsv	Brain_Hypothalamus	Brain_Hypothalamus	5541	18	29	1	['NR5A2']
all_pvalues_SCZ.info.0.6.maf.0.01.sumstats_wide.tsv	all_pvalues_CD.sumstats.info04_wide.tsv	Brain_Hypothalamus	Brain_Hypothalamus	5541	18	43	1	['NR5A2']
all_pvalues_SCZ.info.0.6.maf.0.01.sumstats_wide.tsv	all_pvalues_PSC.sumstats.info04_wide.tsv	Brain_Nucleus_accumbens_basal_ganglia	Brain_Nucleus_accumbens_basal_ganglia	5764	16	19	1	['SCAND3']
all_pvalues_SCZ.info.0.6.maf.0.01.sumstats_wide.tsv	all_pvalues_CD.sumstats.info04_wide.tsv	Brain_Putamen_basal_ganglia	Brain_Putamen_basal_ganglia	6174	14	30	1	['PPP3CA']
all_pvalues_SCZ.info.0.6.maf.0.01.sumstats_wide.tsv	all_pvalues_PSC.sumstats.info04_wide.tsv	Liver	Liver	6496	13	26	1	['HIST1H4J']
all_pvalues_SCZ.info.0.6.maf.0.01.sumstats_wide.tsv	all_pvalues_PSC.sumstats.info04_wide.tsv	Small_Intestine_Terminal_Ileum	Small_Intestine_Terminal_Ileum	5365	9	25	1	['ZSCAN23']
all_pvalues_SCZ.info.0.6.maf.0.01.sumstats_wide.tsv	all_pvalues_PSC.sumstats.info04_wide.tsv	neut_eqtl	neut_eqtl	12470	6	28	1	['BAK1']
all_pvalues_SCZ.info.0.6.maf.0.01.sumstats_wide.tsv	all_pvalues_UC.sumstats.info04_wide.tsv	GBJ	GBJ	1648	89	152	1	['INO80E']
all_pvalues_PSC.sumstats.info04_wide.tsv	all_pvalues_MDD.info.0.4.maf.0.01.sumstats_wide.tsv	Brain_Frontal_Cortex_BA9	Brain_Frontal_Cortex_BA9	5772	18	1	1	['ZSCAN31']
all_pvalues_PSC.sumstats.info04_wide.tsv	all_pvalues_MDD.info.0.4.maf.0.01.sumstats_wide.tsv	Brain_Hippocampus	Brain_Hippocampus	5822	23	1	1	['BTN3A2']
all_pvalues_PSC.sumstats.info04_wide.tsv	all_pvalues_MDD.info.0.4.maf.0.01.sumstats_wide.tsv	Colon_Sigmoid	Colon_Sigmoid	5291	28	1	1	['BTN3A2']
all_pvalues_PSC.sumstats.info04_wide.tsv	all_pvalues_MDD.info.0.4.maf.0.01.sumstats_wide.tsv	Liver	Liver	6492	26	1	1	['BTN3A2']
all_pvalues_PSC.sumstats.info04_wide.tsv	all_pvalues_MDD.info.0.4.maf.0.01.sumstats_wide.tsv	Whole_Blood	Whole_Blood	6130	26	2	1	['PRSS16']
all_pvalues_SCZ.info.0.6.maf.0.01.sumstats_wide.tsv	all_pvalues_UC.sumstats.info04_wide.tsv	Brain_Anterior_cingulate_cortex_BA24	Brain_Anterior_cingulate_cortex_BA24	6514	16	24	0	[]
all_pvalues_SCZ.info.0.6.maf.0.01.sumstats_wide.tsv	all_pvalues_CD.sumstats.info04_wide.tsv	Brain_Anterior_cingulate_cortex_BA24	Brain_Anterior_cingulate_cortex_BA24	6514	16	40	0	[]
all_pvalues_SCZ.info.0.6.maf.0.01.sumstats_wide.tsv	all_pvalues_UC.sumstats.info04_wide.tsv	Brain_Caudate_basal_ganglia	Brain_Caudate_basal_ganglia	5671	14	36	0	[]
all_pvalues_SCZ.info.0.6.maf.0.01.sumstats_wide.tsv	all_pvalues_CD.sumstats.info04_wide.tsv	Brain_Caudate_basal_ganglia	Brain_Caudate_basal_ganglia	5671	14	47	0	[]
all_pvalues_SCZ.info.0.6.maf.0.01.sumstats_wide.tsv	all_pvalues_UC.sumstats.info04_wide.tsv	Brain_Cerebellar_Hemisphere	Brain_Cerebellar_Hemisphere	6440	14	31	0	[]
all_pvalues_SCZ.info.0.6.maf.0.01.sumstats_wide.tsv	all_pvalues_CD.sumstats.info04_wide.tsv	Brain_Cerebellar_Hemisphere	Brain_Cerebellar_Hemisphere	6440	14	41	0	[]
all_pvalues_SCZ.info.0.6.maf.0.01.sumstats_wide.tsv	all_pvalues_UC.sumstats.info04_wide.tsv	Brain_Cerebellum	Brain_Cerebellum	6093	14	34	0	[]
all_pvalues_SCZ.info.0.6.maf.0.01.sumstats_wide.tsv	all_pvalues_PSC.sumstats.info04_wide.tsv	Brain_Cerebellum	Brain_Cerebellum	6093	14	21	0	[]
all_pvalues_SCZ.info.0.6.maf.0.01.sumstats_wide.tsv	all_pvalues_CD.sumstats.info04_wide.tsv	Brain_Cerebellum	Brain_Cerebellum	6093	14	45	0	[]
all_pvalues_SCZ.info.0.6.maf.0.01.sumstats_wide.tsv	all_pvalues_UC.sumstats.info04_wide.tsv	Brain_Cortex	Brain_Cortex	5857	11	21	0	[]
all_pvalues_SCZ.info.0.6.maf.0.01.sumstats_wide.tsv	all_pvalues_CD.sumstats.info04_wide.tsv	Brain_Cortex	Brain_Cortex	5857	11	27	0	[]
all_pvalues_SCZ.info.0.6.maf.0.01.sumstats_wide.tsv	all_pvalues_CD.sumstats.info04_wide.tsv	Brain_Frontal_Cortex_BA9	Brain_Frontal_Cortex_BA9	5783	15	29	0	[]
all_pvalues_SCZ.info.0.6.maf.0.01.sumstats_wide.tsv	all_pvalues_UC.sumstats.info04_wide.tsv	Brain_Hippocampus	Brain_Hippocampus	5829	13	30	0	[]
all_pvalues_SCZ.info.0.6.maf.0.01.sumstats_wide.tsv	all_pvalues_PSC.sumstats.info04_wide.tsv	Brain_Hippocampus	Brain_Hippocampus	5829	13	23	0	[]
all_pvalues_SCZ.info.0.6.maf.0.01.sumstats_wide.tsv	all_pvalues_CD.sumstats.info04_wide.tsv	Brain_Hippocampus	Brain_Hippocampus	5829	13	40	0	[]
all_pvalues_SCZ.info.0.6.maf.0.01.sumstats_wide.tsv	all_pvalues_UC.sumstats.info04_wide.tsv	Brain_Nucleus_accumbens_basal_ganglia	Brain_Nucleus_accumbens_basal_ganglia	5764	16	28	0	[]
all_pvalues_SCZ.info.0.6.maf.0.01.sumstats_wide.tsv	all_pvalues_CD.sumstats.info04_wide.tsv	Brain_Nucleus_accumbens_basal_ganglia	Brain_Nucleus_accumbens_basal_ganglia	5764	16	38	0	[]
all_pvalues_SCZ.info.0.6.maf.0.01.sumstats_wide.tsv	all_pvalues_UC.sumstats.info04_wide.tsv	Brain_Putamen_basal_ganglia	Brain_Putamen_basal_ganglia	6174	14	31	0	[]
all_pvalues_SCZ.info.0.6.maf.0.01.sumstats_wide.tsv	all_pvalues_UC.sumstats.info04_wide.tsv	Colon_Sigmoid	Colon_Sigmoid	5298	14	36	0	[]
all_pvalues_SCZ.info.0.6.maf.0.01.sumstats_wide.tsv	all_pvalues_CD.sumstats.info04_wide.tsv	Colon_Sigmoid	Colon_Sigmoid	5298	14	31	0	[]
all_pvalues_SCZ.info.0.6.maf.0.01.sumstats_wide.tsv	all_pvalues_UC.sumstats.info04_wide.tsv	Colon_Transverse	Colon_Transverse	4762	14	31	0	[]
all_pvalues_SCZ.info.0.6.maf.0.01.sumstats_wide.tsv	all_pvalues_CD.sumstats.info04_wide.tsv	Colon_Transverse	Colon_Transverse	4762	14	48	0	[]
all_pvalues_SCZ.info.0.6.maf.0.01.sumstats_wide.tsv	all_pvalues_UC.sumstats.info04_wide.tsv	Esophagus_Gastroesophageal_Junction	Esophagus_Gastroesophageal_Junction	5480	17	36	0	[]
all_pvalues_SCZ.info.0.6.maf.0.01.sumstats_wide.tsv	all_pvalues_CD.sumstats.info04_wide.tsv	Esophagus_Gastroesophageal_Junction	Esophagus_Gastroesophageal_Junction	5480	17	45	0	[]
all_pvalues_SCZ.info.0.6.maf.0.01.sumstats_wide.tsv	all_pvalues_UC.sumstats.info04_wide.tsv	Esophagus_Mucosa	Esophagus_Mucosa	4983	16	39	0	[]
all_pvalues_SCZ.info.0.6.maf.0.01.sumstats_wide.tsv	all_pvalues_CD.sumstats.info04_wide.tsv	Esophagus_Mucosa	Esophagus_Mucosa	4983	16	47	0	[]
all_pvalues_SCZ.info.0.6.maf.0.01.sumstats_wide.tsv	all_pvalues_UC.sumstats.info04_wide.tsv	Esophagus_Muscularis	Esophagus_Muscularis	5275	16	35	0	[]
all_pvalues_SCZ.info.0.6.maf.0.01.sumstats_wide.tsv	all_pvalues_CD.sumstats.info04_wide.tsv	Esophagus_Muscularis	Esophagus_Muscularis	5275	16	47	0	[]
all_pvalues_SCZ.info.0.6.maf.0.01.sumstats_wide.tsv	all_pvalues_UC.sumstats.info04_wide.tsv	Liver	Liver	6496	13	25	0	[]
all_pvalues_SCZ.info.0.6.maf.0.01.sumstats_wide.tsv	all_pvalues_CD.sumstats.info04_wide.tsv	Liver	Liver	6496	13	39	0	[]
all_pvalues_SCZ.info.0.6.maf.0.01.sumstats_wide.tsv	all_pvalues_UC.sumstats.info04_wide.tsv	Liver_STARNET1	Liver_STARNET1	15474	3	2	0	[]
all_pvalues_SCZ.info.0.6.maf.0.01.sumstats_wide.tsv	all_pvalues_PSC.sumstats.info04_wide.tsv	Liver_STARNET1	Liver_STARNET1	15474	3	0	0	[]
all_pvalues_SCZ.info.0.6.maf.0.01.sumstats_wide.tsv	all_pvalues_CD.sumstats.info04_wide.tsv	Liver_STARNET1	Liver_STARNET1	15474	3	5	0	[]
all_pvalues_SCZ.info.0.6.maf.0.01.sumstats_wide.tsv	all_pvalues_UC.sumstats.info04_wide.tsv	Pancreas	Pancreas	5893	14	24	0	[]
all_pvalues_SCZ.info.0.6.maf.0.01.sumstats_wide.tsv	all_pvalues_CD.sumstats.info04_wide.tsv	Pancreas	Pancreas	5893	14	34	0	[]
all_pvalues_SCZ.info.0.6.maf.0.01.sumstats_wide.tsv	all_pvalues_UC.sumstats.info04_wide.tsv	Small_Intestine_Terminal_Ileum	Small_Intestine_Terminal_Ileum	5365	9	23	0	[]
all_pvalues_SCZ.info.0.6.maf.0.01.sumstats_wide.tsv	all_pvalues_CD.sumstats.info04_wide.tsv	Small_Intestine_Terminal_Ileum	Small_Intestine_Terminal_Ileum	5365	9	41	0	[]
all_pvalues_SCZ.info.0.6.maf.0.01.sumstats_wide.tsv	all_pvalues_UC.sumstats.info04_wide.tsv	Whole_Blood	Whole_Blood	6135	14	23	0	[]
all_pvalues_SCZ.info.0.6.maf.0.01.sumstats_wide.tsv	all_pvalues_CD.sumstats.info04_wide.tsv	Whole_Blood	Whole_Blood	6135	14	40	0	[]
all_pvalues_SCZ.info.0.6.maf.0.01.sumstats_wide.tsv	all_pvalues_UC.sumstats.info04_wide.tsv	mono_eqtl	mono_eqtl	17061	0	1	0	[]
all_pvalues_SCZ.info.0.6.maf.0.01.sumstats_wide.tsv	all_pvalues_PSC.sumstats.info04_wide.tsv	mono_eqtl	mono_eqtl	17061	0	0	0	[]
all_pvalues_SCZ.info.0.6.maf.0.01.sumstats_wide.tsv	all_pvalues_CD.sumstats.info04_wide.tsv	mono_eqtl	mono_eqtl	17061	0	0	0	[]
all_pvalues_SCZ.info.0.6.maf.0.01.sumstats_wide.tsv	all_pvalues_UC.sumstats.info04_wide.tsv	neut_eqtl	neut_eqtl	12470	6	11	0	[]
all_pvalues_SCZ.info.0.6.maf.0.01.sumstats_wide.tsv	all_pvalues_CD.sumstats.info04_wide.tsv	neut_eqtl	neut_eqtl	12470	6	28	0	[]
all_pvalues_SCZ.info.0.6.maf.0.01.sumstats_wide.tsv	all_pvalues_UC.sumstats.info04_wide.tsv	tcel_eqtl	tcel_eqtl	12503	11	13	0	[]
all_pvalues_SCZ.info.0.6.maf.0.01.sumstats_wide.tsv	all_pvalues_PSC.sumstats.info04_wide.tsv	tcel_eqtl	tcel_eqtl	12503	11	9	0	[]
all_pvalues_SCZ.info.0.6.maf.0.01.sumstats_wide.tsv	all_pvalues_CD.sumstats.info04_wide.tsv	tcel_eqtl	tcel_eqtl	12503	11	24	0	[]
all_pvalues_BIP.info.0.4.maf.0.01.sumstats_wide.tsv	all_pvalues_UC.sumstats.info04_wide.tsv	Brain_Anterior_cingulate_cortex_BA24	Brain_Anterior_cingulate_cortex_BA24	6504	3	24	0	[]
all_pvalues_BIP.info.0.4.maf.0.01.sumstats_wide.tsv	all_pvalues_PSC.sumstats.info04_wide.tsv	Brain_Anterior_cingulate_cortex_BA24	Brain_Anterior_cingulate_cortex_BA24	6504	3	18	0	[]
all_pvalues_BIP.info.0.4.maf.0.01.sumstats_wide.tsv	all_pvalues_CD.sumstats.info04_wide.tsv	Brain_Anterior_cingulate_cortex_BA24	Brain_Anterior_cingulate_cortex_BA24	6504	3	40	0	[]
all_pvalues_BIP.info.0.4.maf.0.01.sumstats_wide.tsv	all_pvalues_UC.sumstats.info04_wide.tsv	Brain_Caudate_basal_ganglia	Brain_Caudate_basal_ganglia	5661	1	36	0	[]
all_pvalues_BIP.info.0.4.maf.0.01.sumstats_wide.tsv	all_pvalues_PSC.sumstats.info04_wide.tsv	Brain_Caudate_basal_ganglia	Brain_Caudate_basal_ganglia	5661	1	26	0	[]
all_pvalues_BIP.info.0.4.maf.0.01.sumstats_wide.tsv	all_pvalues_CD.sumstats.info04_wide.tsv	Brain_Caudate_basal_ganglia	Brain_Caudate_basal_ganglia	5661	1	47	0	[]
all_pvalues_BIP.info.0.4.maf.0.01.sumstats_wide.tsv	all_pvalues_UC.sumstats.info04_wide.tsv	Brain_Cerebellar_Hemisphere	Brain_Cerebellar_Hemisphere	6426	2	31	0	[]
all_pvalues_BIP.info.0.4.maf.0.01.sumstats_wide.tsv	all_pvalues_PSC.sumstats.info04_wide.tsv	Brain_Cerebellar_Hemisphere	Brain_Cerebellar_Hemisphere	6426	2	27	0	[]
all_pvalues_BIP.info.0.4.maf.0.01.sumstats_wide.tsv	all_pvalues_CD.sumstats.info04_wide.tsv	Brain_Cerebellar_Hemisphere	Brain_Cerebellar_Hemisphere	6426	2	41	0	[]
all_pvalues_BIP.info.0.4.maf.0.01.sumstats_wide.tsv	all_pvalues_UC.sumstats.info04_wide.tsv	Brain_Cerebellum	Brain_Cerebellum	6078	0	34	0	[]
all_pvalues_BIP.info.0.4.maf.0.01.sumstats_wide.tsv	all_pvalues_PSC.sumstats.info04_wide.tsv	Brain_Cerebellum	Brain_Cerebellum	6078	0	21	0	[]
all_pvalues_BIP.info.0.4.maf.0.01.sumstats_wide.tsv	all_pvalues_CD.sumstats.info04_wide.tsv	Brain_Cerebellum	Brain_Cerebellum	6078	0	45	0	[]
all_pvalues_BIP.info.0.4.maf.0.01.sumstats_wide.tsv	all_pvalues_UC.sumstats.info04_wide.tsv	Brain_Cortex	Brain_Cortex	5845	1	21	0	[]
all_pvalues_BIP.info.0.4.maf.0.01.sumstats_wide.tsv	all_pvalues_PSC.sumstats.info04_wide.tsv	Brain_Cortex	Brain_Cortex	5845	1	18	0	[]
all_pvalues_BIP.info.0.4.maf.0.01.sumstats_wide.tsv	all_pvalues_CD.sumstats.info04_wide.tsv	Brain_Cortex	Brain_Cortex	5845	1	27	0	[]
all_pvalues_BIP.info.0.4.maf.0.01.sumstats_wide.tsv	all_pvalues_UC.sumstats.info04_wide.tsv	Brain_Frontal_Cortex_BA9	Brain_Frontal_Cortex_BA9	5769	3	24	0	[]
all_pvalues_BIP.info.0.4.maf.0.01.sumstats_wide.tsv	all_pvalues_PSC.sumstats.info04_wide.tsv	Brain_Frontal_Cortex_BA9	Brain_Frontal_Cortex_BA9	5769	3	18	0	[]
all_pvalues_BIP.info.0.4.maf.0.01.sumstats_wide.tsv	all_pvalues_CD.sumstats.info04_wide.tsv	Brain_Frontal_Cortex_BA9	Brain_Frontal_Cortex_BA9	5769	3	29	0	[]
all_pvalues_BIP.info.0.4.maf.0.01.sumstats_wide.tsv	all_pvalues_UC.sumstats.info04_wide.tsv	Brain_Hippocampus	Brain_Hippocampus	5818	3	30	0	[]
all_pvalues_BIP.info.0.4.maf.0.01.sumstats_wide.tsv	all_pvalues_PSC.sumstats.info04_wide.tsv	Brain_Hippocampus	Brain_Hippocampus	5818	3	23	0	[]
all_pvalues_BIP.info.0.4.maf.0.01.sumstats_wide.tsv	all_pvalues_CD.sumstats.info04_wide.tsv	Brain_Hippocampus	Brain_Hippocampus	5818	3	40	0	[]
all_pvalues_BIP.info.0.4.maf.0.01.sumstats_wide.tsv	all_pvalues_UC.sumstats.info04_wide.tsv	Brain_Hypothalamus	Brain_Hypothalamus	5527	0	29	0	[]
all_pvalues_BIP.info.0.4.maf.0.01.sumstats_wide.tsv	all_pvalues_PSC.sumstats.info04_wide.tsv	Brain_Hypothalamus	Brain_Hypothalamus	5527	0	23	0	[]
all_pvalues_BIP.info.0.4.maf.0.01.sumstats_wide.tsv	all_pvalues_CD.sumstats.info04_wide.tsv	Brain_Hypothalamus	Brain_Hypothalamus	5527	0	43	0	[]
all_pvalues_BIP.info.0.4.maf.0.01.sumstats_wide.tsv	all_pvalues_UC.sumstats.info04_wide.tsv	Brain_Nucleus_accumbens_basal_ganglia	Brain_Nucleus_accumbens_basal_ganglia	5749	0	28	0	[]
all_pvalues_BIP.info.0.4.maf.0.01.sumstats_wide.tsv	all_pvalues_PSC.sumstats.info04_wide.tsv	Brain_Nucleus_accumbens_basal_ganglia	Brain_Nucleus_accumbens_basal_ganglia	5749	0	19	0	[]
all_pvalues_BIP.info.0.4.maf.0.01.sumstats_wide.tsv	all_pvalues_CD.sumstats.info04_wide.tsv	Brain_Nucleus_accumbens_basal_ganglia	Brain_Nucleus_accumbens_basal_ganglia	5749	0	38	0	[]
all_pvalues_BIP.info.0.4.maf.0.01.sumstats_wide.tsv	all_pvalues_UC.sumstats.info04_wide.tsv	Brain_Putamen_basal_ganglia	Brain_Putamen_basal_ganglia	6162	1	31	0	[]
all_pvalues_BIP.info.0.4.maf.0.01.sumstats_wide.tsv	all_pvalues_PSC.sumstats.info04_wide.tsv	Brain_Putamen_basal_ganglia	Brain_Putamen_basal_ganglia	6162	1	20	0	[]
all_pvalues_BIP.info.0.4.maf.0.01.sumstats_wide.tsv	all_pvalues_CD.sumstats.info04_wide.tsv	Brain_Putamen_basal_ganglia	Brain_Putamen_basal_ganglia	6162	1	30	0	[]
all_pvalues_BIP.info.0.4.maf.0.01.sumstats_wide.tsv	all_pvalues_UC.sumstats.info04_wide.tsv	Colon_Sigmoid	Colon_Sigmoid	5285	1	36	0	[]
all_pvalues_BIP.info.0.4.maf.0.01.sumstats_wide.tsv	all_pvalues_PSC.sumstats.info04_wide.tsv	Colon_Sigmoid	Colon_Sigmoid	5285	1	28	0	[]
all_pvalues_BIP.info.0.4.maf.0.01.sumstats_wide.tsv	all_pvalues_CD.sumstats.info04_wide.tsv	Colon_Sigmoid	Colon_Sigmoid	5285	1	31	0	[]
all_pvalues_BIP.info.0.4.maf.0.01.sumstats_wide.tsv	all_pvalues_UC.sumstats.info04_wide.tsv	Colon_Transverse	Colon_Transverse	4748	0	31	0	[]
all_pvalues_BIP.info.0.4.maf.0.01.sumstats_wide.tsv	all_pvalues_PSC.sumstats.info04_wide.tsv	Colon_Transverse	Colon_Transverse	4748	0	22	0	[]
all_pvalues_BIP.info.0.4.maf.0.01.sumstats_wide.tsv	all_pvalues_CD.sumstats.info04_wide.tsv	Colon_Transverse	Colon_Transverse	4748	0	48	0	[]
all_pvalues_BIP.info.0.4.maf.0.01.sumstats_wide.tsv	all_pvalues_UC.sumstats.info04_wide.tsv	Esophagus_Gastroesophageal_Junction	Esophagus_Gastroesophageal_Junction	5467	0	36	0	[]
all_pvalues_BIP.info.0.4.maf.0.01.sumstats_wide.tsv	all_pvalues_PSC.sumstats.info04_wide.tsv	Esophagus_Gastroesophageal_Junction	Esophagus_Gastroesophageal_Junction	5467	0	28	0	[]
all_pvalues_BIP.info.0.4.maf.0.01.sumstats_wide.tsv	all_pvalues_CD.sumstats.info04_wide.tsv	Esophagus_Gastroesophageal_Junction	Esophagus_Gastroesophageal_Junction	5467	0	45	0	[]
all_pvalues_BIP.info.0.4.maf.0.01.sumstats_wide.tsv	all_pvalues_UC.sumstats.info04_wide.tsv	Esophagus_Mucosa	Esophagus_Mucosa	4970	3	39	0	[]
all_pvalues_BIP.info.0.4.maf.0.01.sumstats_wide.tsv	all_pvalues_PSC.sumstats.info04_wide.tsv	Esophagus_Mucosa	Esophagus_Mucosa	4970	3	36	0	[]
all_pvalues_BIP.info.0.4.maf.0.01.sumstats_wide.tsv	all_pvalues_CD.sumstats.info04_wide.tsv	Esophagus_Mucosa	Esophagus_Mucosa	4970	3	47	0	[]
all_pvalues_BIP.info.0.4.maf.0.01.sumstats_wide.tsv	all_pvalues_UC.sumstats.info04_wide.tsv	Esophagus_Muscularis	Esophagus_Muscularis	5260	1	35	0	[]
all_pvalues_BIP.info.0.4.maf.0.01.sumstats_wide.tsv	all_pvalues_PSC.sumstats.info04_wide.tsv	Esophagus_Muscularis	Esophagus_Muscularis	5260	1	24	0	[]
all_pvalues_BIP.info.0.4.maf.0.01.sumstats_wide.tsv	all_pvalues_CD.sumstats.info04_wide.tsv	Esophagus_Muscularis	Esophagus_Muscularis	5260	1	47	0	[]
all_pvalues_BIP.info.0.4.maf.0.01.sumstats_wide.tsv	all_pvalues_UC.sumstats.info04_wide.tsv	Liver	Liver	6484	1	25	0	[]
all_pvalues_BIP.info.0.4.maf.0.01.sumstats_wide.tsv	all_pvalues_PSC.sumstats.info04_wide.tsv	Liver	Liver	6484	1	26	0	[]
all_pvalues_BIP.info.0.4.maf.0.01.sumstats_wide.tsv	all_pvalues_CD.sumstats.info04_wide.tsv	Liver	Liver	6484	1	39	0	[]
all_pvalues_BIP.info.0.4.maf.0.01.sumstats_wide.tsv	all_pvalues_UC.sumstats.info04_wide.tsv	Liver_STARNET1	Liver_STARNET1	15474	0	2	0	[]
all_pvalues_BIP.info.0.4.maf.0.01.sumstats_wide.tsv	all_pvalues_PSC.sumstats.info04_wide.tsv	Liver_STARNET1	Liver_STARNET1	15474	0	0	0	[]
all_pvalues_BIP.info.0.4.maf.0.01.sumstats_wide.tsv	all_pvalues_CD.sumstats.info04_wide.tsv	Liver_STARNET1	Liver_STARNET1	15474	0	5	0	[]
all_pvalues_BIP.info.0.4.maf.0.01.sumstats_wide.tsv	all_pvalues_UC.sumstats.info04_wide.tsv	Pancreas	Pancreas	5882	0	24	0	[]
all_pvalues_BIP.info.0.4.maf.0.01.sumstats_wide.tsv	all_pvalues_PSC.sumstats.info04_wide.tsv	Pancreas	Pancreas	5882	0	24	0	[]
all_pvalues_BIP.info.0.4.maf.0.01.sumstats_wide.tsv	all_pvalues_CD.sumstats.info04_wide.tsv	Pancreas	Pancreas	5882	0	34	0	[]
all_pvalues_BIP.info.0.4.maf.0.01.sumstats_wide.tsv	all_pvalues_UC.sumstats.info04_wide.tsv	Small_Intestine_Terminal_Ileum	Small_Intestine_Terminal_Ileum	5355	1	23	0	[]
all_pvalues_BIP.info.0.4.maf.0.01.sumstats_wide.tsv	all_pvalues_PSC.sumstats.info04_wide.tsv	Small_Intestine_Terminal_Ileum	Small_Intestine_Terminal_Ileum	5355	1	25	0	[]
all_pvalues_BIP.info.0.4.maf.0.01.sumstats_wide.tsv	all_pvalues_CD.sumstats.info04_wide.tsv	Small_Intestine_Terminal_Ileum	Small_Intestine_Terminal_Ileum	5355	1	41	0	[]
all_pvalues_BIP.info.0.4.maf.0.01.sumstats_wide.tsv	all_pvalues_UC.sumstats.info04_wide.tsv	Whole_Blood	Whole_Blood	6126	0	23	0	[]
all_pvalues_BIP.info.0.4.maf.0.01.sumstats_wide.tsv	all_pvalues_PSC.sumstats.info04_wide.tsv	Whole_Blood	Whole_Blood	6126	0	26	0	[]
all_pvalues_BIP.info.0.4.maf.0.01.sumstats_wide.tsv	all_pvalues_CD.sumstats.info04_wide.tsv	Whole_Blood	Whole_Blood	6126	0	40	0	[]
all_pvalues_BIP.info.0.4.maf.0.01.sumstats_wide.tsv	all_pvalues_UC.sumstats.info04_wide.tsv	mono_eqtl	mono_eqtl	17059	0	1	0	[]
all_pvalues_BIP.info.0.4.maf.0.01.sumstats_wide.tsv	all_pvalues_PSC.sumstats.info04_wide.tsv	mono_eqtl	mono_eqtl	17059	0	0	0	[]
all_pvalues_BIP.info.0.4.maf.0.01.sumstats_wide.tsv	all_pvalues_CD.sumstats.info04_wide.tsv	mono_eqtl	mono_eqtl	17059	0	0	0	[]
all_pvalues_BIP.info.0.4.maf.0.01.sumstats_wide.tsv	all_pvalues_UC.sumstats.info04_wide.tsv	neut_eqtl	neut_eqtl	12455	1	11	0	[]
all_pvalues_BIP.info.0.4.maf.0.01.sumstats_wide.tsv	all_pvalues_PSC.sumstats.info04_wide.tsv	neut_eqtl	neut_eqtl	12455	1	28	0	[]
all_pvalues_BIP.info.0.4.maf.0.01.sumstats_wide.tsv	all_pvalues_CD.sumstats.info04_wide.tsv	neut_eqtl	neut_eqtl	12455	1	28	0	[]
all_pvalues_BIP.info.0.4.maf.0.01.sumstats_wide.tsv	all_pvalues_UC.sumstats.info04_wide.tsv	tcel_eqtl	tcel_eqtl	12485	0	13	0	[]
all_pvalues_BIP.info.0.4.maf.0.01.sumstats_wide.tsv	all_pvalues_PSC.sumstats.info04_wide.tsv	tcel_eqtl	tcel_eqtl	12485	0	9	0	[]
all_pvalues_BIP.info.0.4.maf.0.01.sumstats_wide.tsv	all_pvalues_CD.sumstats.info04_wide.tsv	tcel_eqtl	tcel_eqtl	12485	0	24	0	[]
all_pvalues_BIP.info.0.4.maf.0.01.sumstats_wide.tsv	all_pvalues_UC.sumstats.info04_wide.tsv	GBJ	GBJ	1631	5	152	0	[]
all_pvalues_BIP.info.0.4.maf.0.01.sumstats_wide.tsv	all_pvalues_PSC.sumstats.info04_wide.tsv	GBJ	GBJ	1631	5	150	0	[]
all_pvalues_BIP.info.0.4.maf.0.01.sumstats_wide.tsv	all_pvalues_CD.sumstats.info04_wide.tsv	GBJ	GBJ	1631	5	215	0	[]
all_pvalues_UC.sumstats.info04_wide.tsv	all_pvalues_ADHD.info.0.8.maf.0.01.sumstats_wide.tsv	Brain_Anterior_cingulate_cortex_BA24	Brain_Anterior_cingulate_cortex_BA24	6619	24	1	0	[]
all_pvalues_UC.sumstats.info04_wide.tsv	all_pvalues_MDD.info.0.4.maf.0.01.sumstats_wide.tsv	Brain_Anterior_cingulate_cortex_BA24	Brain_Anterior_cingulate_cortex_BA24	6510	24	2	0	[]
all_pvalues_UC.sumstats.info04_wide.tsv	all_pvalues_ADHD.info.0.8.maf.0.01.sumstats_wide.tsv	Brain_Caudate_basal_ganglia	Brain_Caudate_basal_ganglia	5776	36	3	0	[]
all_pvalues_UC.sumstats.info04_wide.tsv	all_pvalues_MDD.info.0.4.maf.0.01.sumstats_wide.tsv	Brain_Caudate_basal_ganglia	Brain_Caudate_basal_ganglia	5664	36	2	0	[]
all_pvalues_UC.sumstats.info04_wide.tsv	all_pvalues_ADHD.info.0.8.maf.0.01.sumstats_wide.tsv	Brain_Cerebellar_Hemisphere	Brain_Cerebellar_Hemisphere	6540	31	1	0	[]
all_pvalues_UC.sumstats.info04_wide.tsv	all_pvalues_MDD.info.0.4.maf.0.01.sumstats_wide.tsv	Brain_Cerebellar_Hemisphere	Brain_Cerebellar_Hemisphere	6429	31	3	0	[]
all_pvalues_UC.sumstats.info04_wide.tsv	all_pvalues_ADHD.info.0.8.maf.0.01.sumstats_wide.tsv	Brain_Cerebellum	Brain_Cerebellum	6192	34	2	0	[]
all_pvalues_UC.sumstats.info04_wide.tsv	all_pvalues_MDD.info.0.4.maf.0.01.sumstats_wide.tsv	Brain_Cerebellum	Brain_Cerebellum	6081	34	3	0	[]
all_pvalues_UC.sumstats.info04_wide.tsv	all_pvalues_ADHD.info.0.8.maf.0.01.sumstats_wide.tsv	Brain_Cortex	Brain_Cortex	5957	21	2	0	[]
all_pvalues_UC.sumstats.info04_wide.tsv	all_pvalues_MDD.info.0.4.maf.0.01.sumstats_wide.tsv	Brain_Cortex	Brain_Cortex	5849	21	0	0	[]
all_pvalues_UC.sumstats.info04_wide.tsv	all_pvalues_ADHD.info.0.8.maf.0.01.sumstats_wide.tsv	Brain_Frontal_Cortex_BA9	Brain_Frontal_Cortex_BA9	5890	24	1	0	[]
all_pvalues_UC.sumstats.info04_wide.tsv	all_pvalues_MDD.info.0.4.maf.0.01.sumstats_wide.tsv	Brain_Frontal_Cortex_BA9	Brain_Frontal_Cortex_BA9	5772	24	1	0	[]
all_pvalues_UC.sumstats.info04_wide.tsv	all_pvalues_ADHD.info.0.8.maf.0.01.sumstats_wide.tsv	Brain_Hippocampus	Brain_Hippocampus	5930	30	1	0	[]
all_pvalues_UC.sumstats.info04_wide.tsv	all_pvalues_MDD.info.0.4.maf.0.01.sumstats_wide.tsv	Brain_Hippocampus	Brain_Hippocampus	5822	30	1	0	[]
all_pvalues_UC.sumstats.info04_wide.tsv	all_pvalues_ADHD.info.0.8.maf.0.01.sumstats_wide.tsv	Brain_Hypothalamus	Brain_Hypothalamus	5644	29	3	0	[]
all_pvalues_UC.sumstats.info04_wide.tsv	all_pvalues_MDD.info.0.4.maf.0.01.sumstats_wide.tsv	Brain_Hypothalamus	Brain_Hypothalamus	5533	29	1	0	[]
all_pvalues_UC.sumstats.info04_wide.tsv	all_pvalues_ADHD.info.0.8.maf.0.01.sumstats_wide.tsv	Brain_Nucleus_accumbens_basal_ganglia	Brain_Nucleus_accumbens_basal_ganglia	5862	28	4	0	[]
all_pvalues_UC.sumstats.info04_wide.tsv	all_pvalues_MDD.info.0.4.maf.0.01.sumstats_wide.tsv	Brain_Nucleus_accumbens_basal_ganglia	Brain_Nucleus_accumbens_basal_ganglia	5749	28	1	0	[]
all_pvalues_UC.sumstats.info04_wide.tsv	all_pvalues_ADHD.info.0.8.maf.0.01.sumstats_wide.tsv	Brain_Putamen_basal_ganglia	Brain_Putamen_basal_ganglia	6288	31	0	0	[]
all_pvalues_UC.sumstats.info04_wide.tsv	all_pvalues_MDD.info.0.4.maf.0.01.sumstats_wide.tsv	Brain_Putamen_basal_ganglia	Brain_Putamen_basal_ganglia	6167	31	0	0	[]
all_pvalues_UC.sumstats.info04_wide.tsv	all_pvalues_ADHD.info.0.8.maf.0.01.sumstats_wide.tsv	Colon_Sigmoid	Colon_Sigmoid	5400	36	2	0	[]
all_pvalues_UC.sumstats.info04_wide.tsv	all_pvalues_MDD.info.0.4.maf.0.01.sumstats_wide.tsv	Colon_Sigmoid	Colon_Sigmoid	5291	36	1	0	[]
all_pvalues_UC.sumstats.info04_wide.tsv	all_pvalues_ADHD.info.0.8.maf.0.01.sumstats_wide.tsv	Colon_Transverse	Colon_Transverse	4865	31	1	0	[]
all_pvalues_UC.sumstats.info04_wide.tsv	all_pvalues_MDD.info.0.4.maf.0.01.sumstats_wide.tsv	Colon_Transverse	Colon_Transverse	4755	31	1	0	[]
all_pvalues_UC.sumstats.info04_wide.tsv	all_pvalues_ADHD.info.0.8.maf.0.01.sumstats_wide.tsv	Esophagus_Gastroesophageal_Junction	Esophagus_Gastroesophageal_Junction	5580	36	3	0	[]
all_pvalues_UC.sumstats.info04_wide.tsv	all_pvalues_MDD.info.0.4.maf.0.01.sumstats_wide.tsv	Esophagus_Gastroesophageal_Junction	Esophagus_Gastroesophageal_Junction	5472	36	1	0	[]
all_pvalues_UC.sumstats.info04_wide.tsv	all_pvalues_ADHD.info.0.8.maf.0.01.sumstats_wide.tsv	Esophagus_Mucosa	Esophagus_Mucosa	5099	39	1	0	[]
all_pvalues_UC.sumstats.info04_wide.tsv	all_pvalues_MDD.info.0.4.maf.0.01.sumstats_wide.tsv	Esophagus_Mucosa	Esophagus_Mucosa	4972	39	1	0	[]
all_pvalues_UC.sumstats.info04_wide.tsv	all_pvalues_ADHD.info.0.8.maf.0.01.sumstats_wide.tsv	Esophagus_Muscularis	Esophagus_Muscularis	5382	35	4	0	[]
all_pvalues_UC.sumstats.info04_wide.tsv	all_pvalues_MDD.info.0.4.maf.0.01.sumstats_wide.tsv	Esophagus_Muscularis	Esophagus_Muscularis	5265	35	2	0	[]
all_pvalues_UC.sumstats.info04_wide.tsv	all_pvalues_ADHD.info.0.8.maf.0.01.sumstats_wide.tsv	Liver	Liver	6591	25	2	0	[]
all_pvalues_UC.sumstats.info04_wide.tsv	all_pvalues_MDD.info.0.4.maf.0.01.sumstats_wide.tsv	Liver	Liver	6492	25	1	0	[]
all_pvalues_UC.sumstats.info04_wide.tsv	all_pvalues_ADHD.info.0.8.maf.0.01.sumstats_wide.tsv	Liver_STARNET1	Liver_STARNET1	15476	2	0	0	[]
all_pvalues_UC.sumstats.info04_wide.tsv	all_pvalues_MDD.info.0.4.maf.0.01.sumstats_wide.tsv	Liver_STARNET1	Liver_STARNET1	15477	2	0	0	[]
all_pvalues_UC.sumstats.info04_wide.tsv	all_pvalues_ADHD.info.0.8.maf.0.01.sumstats_wide.tsv	Pancreas	Pancreas	6013	24	0	0	[]
all_pvalues_UC.sumstats.info04_wide.tsv	all_pvalues_MDD.info.0.4.maf.0.01.sumstats_wide.tsv	Pancreas	Pancreas	5886	24	0	0	[]
all_pvalues_UC.sumstats.info04_wide.tsv	all_pvalues_ADHD.info.0.8.maf.0.01.sumstats_wide.tsv	Small_Intestine_Terminal_Ileum	Small_Intestine_Terminal_Ileum	5461	23	3	0	[]
all_pvalues_UC.sumstats.info04_wide.tsv	all_pvalues_MDD.info.0.4.maf.0.01.sumstats_wide.tsv	Small_Intestine_Terminal_Ileum	Small_Intestine_Terminal_Ileum	5359	23	0	0	[]
all_pvalues_UC.sumstats.info04_wide.tsv	all_pvalues_ADHD.info.0.8.maf.0.01.sumstats_wide.tsv	Whole_Blood	Whole_Blood	6228	23	1	0	[]
all_pvalues_UC.sumstats.info04_wide.tsv	all_pvalues_MDD.info.0.4.maf.0.01.sumstats_wide.tsv	Whole_Blood	Whole_Blood	6130	23	2	0	[]
all_pvalues_UC.sumstats.info04_wide.tsv	all_pvalues_ADHD.info.0.8.maf.0.01.sumstats_wide.tsv	mono_eqtl	mono_eqtl	17066	1	0	0	[]
all_pvalues_UC.sumstats.info04_wide.tsv	all_pvalues_MDD.info.0.4.maf.0.01.sumstats_wide.tsv	mono_eqtl	mono_eqtl	17059	1	0	0	[]
all_pvalues_UC.sumstats.info04_wide.tsv	all_pvalues_ADHD.info.0.8.maf.0.01.sumstats_wide.tsv	neut_eqtl	neut_eqtl	12557	11	0	0	[]
all_pvalues_UC.sumstats.info04_wide.tsv	all_pvalues_MDD.info.0.4.maf.0.01.sumstats_wide.tsv	neut_eqtl	neut_eqtl	12452	11	1	0	[]
all_pvalues_UC.sumstats.info04_wide.tsv	all_pvalues_ADHD.info.0.8.maf.0.01.sumstats_wide.tsv	tcel_eqtl	tcel_eqtl	12586	13	1	0	[]
all_pvalues_UC.sumstats.info04_wide.tsv	all_pvalues_MDD.info.0.4.maf.0.01.sumstats_wide.tsv	tcel_eqtl	tcel_eqtl	12486	13	0	0	[]
all_pvalues_UC.sumstats.info04_wide.tsv	all_pvalues_ADHD.info.0.8.maf.0.01.sumstats_wide.tsv	GBJ	GBJ	1727	152	10	0	[]
all_pvalues_UC.sumstats.info04_wide.tsv	all_pvalues_MDD.info.0.4.maf.0.01.sumstats_wide.tsv	GBJ	GBJ	1632	152	9	0	[]
all_pvalues_PSC.sumstats.info04_wide.tsv	all_pvalues_ADHD.info.0.8.maf.0.01.sumstats_wide.tsv	Brain_Anterior_cingulate_cortex_BA24	Brain_Anterior_cingulate_cortex_BA24	6619	18	1	0	[]
all_pvalues_PSC.sumstats.info04_wide.tsv	all_pvalues_MDD.info.0.4.maf.0.01.sumstats_wide.tsv	Brain_Anterior_cingulate_cortex_BA24	Brain_Anterior_cingulate_cortex_BA24	6510	18	2	0	[]
all_pvalues_PSC.sumstats.info04_wide.tsv	all_pvalues_ADHD.info.0.8.maf.0.01.sumstats_wide.tsv	Brain_Caudate_basal_ganglia	Brain_Caudate_basal_ganglia	5776	26	3	0	[]
all_pvalues_PSC.sumstats.info04_wide.tsv	all_pvalues_MDD.info.0.4.maf.0.01.sumstats_wide.tsv	Brain_Caudate_basal_ganglia	Brain_Caudate_basal_ganglia	5664	26	2	0	[]
all_pvalues_PSC.sumstats.info04_wide.tsv	all_pvalues_ADHD.info.0.8.maf.0.01.sumstats_wide.tsv	Brain_Cerebellar_Hemisphere	Brain_Cerebellar_Hemisphere	6540	27	1	0	[]
all_pvalues_PSC.sumstats.info04_wide.tsv	all_pvalues_MDD.info.0.4.maf.0.01.sumstats_wide.tsv	Brain_Cerebellar_Hemisphere	Brain_Cerebellar_Hemisphere	6429	27	3	0	[]
all_pvalues_PSC.sumstats.info04_wide.tsv	all_pvalues_ADHD.info.0.8.maf.0.01.sumstats_wide.tsv	Brain_Cerebellum	Brain_Cerebellum	6192	21	2	0	[]
all_pvalues_PSC.sumstats.info04_wide.tsv	all_pvalues_MDD.info.0.4.maf.0.01.sumstats_wide.tsv	Brain_Cerebellum	Brain_Cerebellum	6081	21	3	0	[]
all_pvalues_PSC.sumstats.info04_wide.tsv	all_pvalues_ADHD.info.0.8.maf.0.01.sumstats_wide.tsv	Brain_Cortex	Brain_Cortex	5957	18	2	0	[]
all_pvalues_PSC.sumstats.info04_wide.tsv	all_pvalues_MDD.info.0.4.maf.0.01.sumstats_wide.tsv	Brain_Cortex	Brain_Cortex	5849	18	0	0	[]
all_pvalues_PSC.sumstats.info04_wide.tsv	all_pvalues_ADHD.info.0.8.maf.0.01.sumstats_wide.tsv	Brain_Frontal_Cortex_BA9	Brain_Frontal_Cortex_BA9	5890	18	1	0	[]
all_pvalues_PSC.sumstats.info04_wide.tsv	all_pvalues_ADHD.info.0.8.maf.0.01.sumstats_wide.tsv	Brain_Hippocampus	Brain_Hippocampus	5930	23	1	0	[]
all_pvalues_PSC.sumstats.info04_wide.tsv	all_pvalues_ADHD.info.0.8.maf.0.01.sumstats_wide.tsv	Brain_Hypothalamus	Brain_Hypothalamus	5644	23	3	0	[]
all_pvalues_PSC.sumstats.info04_wide.tsv	all_pvalues_MDD.info.0.4.maf.0.01.sumstats_wide.tsv	Brain_Hypothalamus	Brain_Hypothalamus	5533	23	1	0	[]
all_pvalues_PSC.sumstats.info04_wide.tsv	all_pvalues_ADHD.info.0.8.maf.0.01.sumstats_wide.tsv	Brain_Nucleus_accumbens_basal_ganglia	Brain_Nucleus_accumbens_basal_ganglia	5862	19	4	0	[]
all_pvalues_PSC.sumstats.info04_wide.tsv	all_pvalues_MDD.info.0.4.maf.0.01.sumstats_wide.tsv	Brain_Nucleus_accumbens_basal_ganglia	Brain_Nucleus_accumbens_basal_ganglia	5749	19	1	0	[]
all_pvalues_PSC.sumstats.info04_wide.tsv	all_pvalues_ADHD.info.0.8.maf.0.01.sumstats_wide.tsv	Brain_Putamen_basal_ganglia	Brain_Putamen_basal_ganglia	6288	20	0	0	[]
all_pvalues_PSC.sumstats.info04_wide.tsv	all_pvalues_MDD.info.0.4.maf.0.01.sumstats_wide.tsv	Brain_Putamen_basal_ganglia	Brain_Putamen_basal_ganglia	6167	20	0	0	[]
all_pvalues_PSC.sumstats.info04_wide.tsv	all_pvalues_ADHD.info.0.8.maf.0.01.sumstats_wide.tsv	Colon_Sigmoid	Colon_Sigmoid	5400	28	2	0	[]
all_pvalues_PSC.sumstats.info04_wide.tsv	all_pvalues_ADHD.info.0.8.maf.0.01.sumstats_wide.tsv	Colon_Transverse	Colon_Transverse	4865	22	1	0	[]
all_pvalues_PSC.sumstats.info04_wide.tsv	all_pvalues_MDD.info.0.4.maf.0.01.sumstats_wide.tsv	Colon_Transverse	Colon_Transverse	4755	22	1	0	[]
all_pvalues_PSC.sumstats.info04_wide.tsv	all_pvalues_ADHD.info.0.8.maf.0.01.sumstats_wide.tsv	Esophagus_Gastroesophageal_Junction	Esophagus_Gastroesophageal_Junction	5580	28	3	0	[]
all_pvalues_PSC.sumstats.info04_wide.tsv	all_pvalues_MDD.info.0.4.maf.0.01.sumstats_wide.tsv	Esophagus_Gastroesophageal_Junction	Esophagus_Gastroesophageal_Junction	5472	28	1	0	[]
all_pvalues_PSC.sumstats.info04_wide.tsv	all_pvalues_ADHD.info.0.8.maf.0.01.sumstats_wide.tsv	Esophagus_Mucosa	Esophagus_Mucosa	5099	36	1	0	[]
all_pvalues_PSC.sumstats.info04_wide.tsv	all_pvalues_MDD.info.0.4.maf.0.01.sumstats_wide.tsv	Esophagus_Mucosa	Esophagus_Mucosa	4972	36	1	0	[]
all_pvalues_PSC.sumstats.info04_wide.tsv	all_pvalues_ADHD.info.0.8.maf.0.01.sumstats_wide.tsv	Esophagus_Muscularis	Esophagus_Muscularis	5382	24	4	0	[]
all_pvalues_PSC.sumstats.info04_wide.tsv	all_pvalues_MDD.info.0.4.maf.0.01.sumstats_wide.tsv	Esophagus_Muscularis	Esophagus_Muscularis	5265	24	2	0	[]
all_pvalues_PSC.sumstats.info04_wide.tsv	all_pvalues_ADHD.info.0.8.maf.0.01.sumstats_wide.tsv	Liver	Liver	6591	26	2	0	[]
all_pvalues_PSC.sumstats.info04_wide.tsv	all_pvalues_ADHD.info.0.8.maf.0.01.sumstats_wide.tsv	Liver_STARNET1	Liver_STARNET1	15476	0	0	0	[]
all_pvalues_PSC.sumstats.info04_wide.tsv	all_pvalues_MDD.info.0.4.maf.0.01.sumstats_wide.tsv	Liver_STARNET1	Liver_STARNET1	15477	0	0	0	[]
all_pvalues_PSC.sumstats.info04_wide.tsv	all_pvalues_ADHD.info.0.8.maf.0.01.sumstats_wide.tsv	Pancreas	Pancreas	6013	24	0	0	[]
all_pvalues_PSC.sumstats.info04_wide.tsv	all_pvalues_MDD.info.0.4.maf.0.01.sumstats_wide.tsv	Pancreas	Pancreas	5886	24	0	0	[]
all_pvalues_PSC.sumstats.info04_wide.tsv	all_pvalues_ADHD.info.0.8.maf.0.01.sumstats_wide.tsv	Small_Intestine_Terminal_Ileum	Small_Intestine_Terminal_Ileum	5461	25	3	0	[]
all_pvalues_PSC.sumstats.info04_wide.tsv	all_pvalues_MDD.info.0.4.maf.0.01.sumstats_wide.tsv	Small_Intestine_Terminal_Ileum	Small_Intestine_Terminal_Ileum	5359	25	0	0	[]
all_pvalues_PSC.sumstats.info04_wide.tsv	all_pvalues_ADHD.info.0.8.maf.0.01.sumstats_wide.tsv	Whole_Blood	Whole_Blood	6228	26	1	0	[]
all_pvalues_PSC.sumstats.info04_wide.tsv	all_pvalues_ADHD.info.0.8.maf.0.01.sumstats_wide.tsv	mono_eqtl	mono_eqtl	17066	0	0	0	[]
all_pvalues_PSC.sumstats.info04_wide.tsv	all_pvalues_MDD.info.0.4.maf.0.01.sumstats_wide.tsv	mono_eqtl	mono_eqtl	17059	0	0	0	[]
all_pvalues_PSC.sumstats.info04_wide.tsv	all_pvalues_ADHD.info.0.8.maf.0.01.sumstats_wide.tsv	neut_eqtl	neut_eqtl	12557	28	0	0	[]
all_pvalues_PSC.sumstats.info04_wide.tsv	all_pvalues_MDD.info.0.4.maf.0.01.sumstats_wide.tsv	neut_eqtl	neut_eqtl	12452	28	1	0	[]
all_pvalues_PSC.sumstats.info04_wide.tsv	all_pvalues_ADHD.info.0.8.maf.0.01.sumstats_wide.tsv	tcel_eqtl	tcel_eqtl	12586	9	1	0	[]
all_pvalues_PSC.sumstats.info04_wide.tsv	all_pvalues_MDD.info.0.4.maf.0.01.sumstats_wide.tsv	tcel_eqtl	tcel_eqtl	12486	9	0	0	[]
all_pvalues_PSC.sumstats.info04_wide.tsv	all_pvalues_ADHD.info.0.8.maf.0.01.sumstats_wide.tsv	GBJ	GBJ	1727	150	10	0	[]
all_pvalues_CD.sumstats.info04_wide.tsv	all_pvalues_ADHD.info.0.8.maf.0.01.sumstats_wide.tsv	Brain_Anterior_cingulate_cortex_BA24	Brain_Anterior_cingulate_cortex_BA24	6619	40	1	0	[]
all_pvalues_CD.sumstats.info04_wide.tsv	all_pvalues_MDD.info.0.4.maf.0.01.sumstats_wide.tsv	Brain_Anterior_cingulate_cortex_BA24	Brain_Anterior_cingulate_cortex_BA24	6510	40	2	0	[]
all_pvalues_CD.sumstats.info04_wide.tsv	all_pvalues_ADHD.info.0.8.maf.0.01.sumstats_wide.tsv	Brain_Caudate_basal_ganglia	Brain_Caudate_basal_ganglia	5776	47	3	0	[]
all_pvalues_CD.sumstats.info04_wide.tsv	all_pvalues_MDD.info.0.4.maf.0.01.sumstats_wide.tsv	Brain_Caudate_basal_ganglia	Brain_Caudate_basal_ganglia	5664	47	2	0	[]
all_pvalues_CD.sumstats.info04_wide.tsv	all_pvalues_ADHD.info.0.8.maf.0.01.sumstats_wide.tsv	Brain_Cerebellar_Hemisphere	Brain_Cerebellar_Hemisphere	6540	41	1	0	[]
all_pvalues_CD.sumstats.info04_wide.tsv	all_pvalues_MDD.info.0.4.maf.0.01.sumstats_wide.tsv	Brain_Cerebellar_Hemisphere	Brain_Cerebellar_Hemisphere	6429	41	3	0	[]
all_pvalues_CD.sumstats.info04_wide.tsv	all_pvalues_ADHD.info.0.8.maf.0.01.sumstats_wide.tsv	Brain_Cerebellum	Brain_Cerebellum	6192	45	2	0	[]
all_pvalues_CD.sumstats.info04_wide.tsv	all_pvalues_MDD.info.0.4.maf.0.01.sumstats_wide.tsv	Brain_Cerebellum	Brain_Cerebellum	6081	45	3	0	[]
all_pvalues_CD.sumstats.info04_wide.tsv	all_pvalues_ADHD.info.0.8.maf.0.01.sumstats_wide.tsv	Brain_Cortex	Brain_Cortex	5957	27	2	0	[]
all_pvalues_CD.sumstats.info04_wide.tsv	all_pvalues_MDD.info.0.4.maf.0.01.sumstats_wide.tsv	Brain_Cortex	Brain_Cortex	5849	27	0	0	[]
all_pvalues_CD.sumstats.info04_wide.tsv	all_pvalues_ADHD.info.0.8.maf.0.01.sumstats_wide.tsv	Brain_Frontal_Cortex_BA9	Brain_Frontal_Cortex_BA9	5890	29	1	0	[]
all_pvalues_CD.sumstats.info04_wide.tsv	all_pvalues_MDD.info.0.4.maf.0.01.sumstats_wide.tsv	Brain_Frontal_Cortex_BA9	Brain_Frontal_Cortex_BA9	5772	29	1	0	[]
all_pvalues_CD.sumstats.info04_wide.tsv	all_pvalues_ADHD.info.0.8.maf.0.01.sumstats_wide.tsv	Brain_Hippocampus	Brain_Hippocampus	5930	40	1	0	[]
all_pvalues_CD.sumstats.info04_wide.tsv	all_pvalues_MDD.info.0.4.maf.0.01.sumstats_wide.tsv	Brain_Hippocampus	Brain_Hippocampus	5822	40	1	0	[]
all_pvalues_CD.sumstats.info04_wide.tsv	all_pvalues_ADHD.info.0.8.maf.0.01.sumstats_wide.tsv	Brain_Hypothalamus	Brain_Hypothalamus	5644	43	3	0	[]
all_pvalues_CD.sumstats.info04_wide.tsv	all_pvalues_MDD.info.0.4.maf.0.01.sumstats_wide.tsv	Brain_Hypothalamus	Brain_Hypothalamus	5533	43	1	0	[]
all_pvalues_CD.sumstats.info04_wide.tsv	all_pvalues_ADHD.info.0.8.maf.0.01.sumstats_wide.tsv	Brain_Nucleus_accumbens_basal_ganglia	Brain_Nucleus_accumbens_basal_ganglia	5862	38	4	0	[]
all_pvalues_CD.sumstats.info04_wide.tsv	all_pvalues_MDD.info.0.4.maf.0.01.sumstats_wide.tsv	Brain_Nucleus_accumbens_basal_ganglia	Brain_Nucleus_accumbens_basal_ganglia	5749	38	1	0	[]
all_pvalues_CD.sumstats.info04_wide.tsv	all_pvalues_ADHD.info.0.8.maf.0.01.sumstats_wide.tsv	Brain_Putamen_basal_ganglia	Brain_Putamen_basal_ganglia	6288	30	0	0	[]
all_pvalues_CD.sumstats.info04_wide.tsv	all_pvalues_MDD.info.0.4.maf.0.01.sumstats_wide.tsv	Brain_Putamen_basal_ganglia	Brain_Putamen_basal_ganglia	6167	30	0	0	[]
all_pvalues_CD.sumstats.info04_wide.tsv	all_pvalues_ADHD.info.0.8.maf.0.01.sumstats_wide.tsv	Colon_Sigmoid	Colon_Sigmoid	5400	31	2	0	[]
all_pvalues_CD.sumstats.info04_wide.tsv	all_pvalues_MDD.info.0.4.maf.0.01.sumstats_wide.tsv	Colon_Sigmoid	Colon_Sigmoid	5291	31	1	0	[]
all_pvalues_CD.sumstats.info04_wide.tsv	all_pvalues_ADHD.info.0.8.maf.0.01.sumstats_wide.tsv	Colon_Transverse	Colon_Transverse	4865	48	1	0	[]
all_pvalues_CD.sumstats.info04_wide.tsv	all_pvalues_MDD.info.0.4.maf.0.01.sumstats_wide.tsv	Colon_Transverse	Colon_Transverse	4755	48	1	0	[]
all_pvalues_CD.sumstats.info04_wide.tsv	all_pvalues_ADHD.info.0.8.maf.0.01.sumstats_wide.tsv	Esophagus_Gastroesophageal_Junction	Esophagus_Gastroesophageal_Junction	5580	45	3	0	[]
all_pvalues_CD.sumstats.info04_wide.tsv	all_pvalues_MDD.info.0.4.maf.0.01.sumstats_wide.tsv	Esophagus_Gastroesophageal_Junction	Esophagus_Gastroesophageal_Junction	5472	45	1	0	[]
all_pvalues_CD.sumstats.info04_wide.tsv	all_pvalues_ADHD.info.0.8.maf.0.01.sumstats_wide.tsv	Esophagus_Mucosa	Esophagus_Mucosa	5099	47	1	0	[]
all_pvalues_CD.sumstats.info04_wide.tsv	all_pvalues_MDD.info.0.4.maf.0.01.sumstats_wide.tsv	Esophagus_Mucosa	Esophagus_Mucosa	4972	47	1	0	[]
all_pvalues_CD.sumstats.info04_wide.tsv	all_pvalues_ADHD.info.0.8.maf.0.01.sumstats_wide.tsv	Esophagus_Muscularis	Esophagus_Muscularis	5382	47	4	0	[]
all_pvalues_CD.sumstats.info04_wide.tsv	all_pvalues_MDD.info.0.4.maf.0.01.sumstats_wide.tsv	Esophagus_Muscularis	Esophagus_Muscularis	5265	47	2	0	[]
all_pvalues_CD.sumstats.info04_wide.tsv	all_pvalues_ADHD.info.0.8.maf.0.01.sumstats_wide.tsv	Liver	Liver	6591	39	2	0	[]
all_pvalues_CD.sumstats.info04_wide.tsv	all_pvalues_MDD.info.0.4.maf.0.01.sumstats_wide.tsv	Liver	Liver	6492	39	1	0	[]
all_pvalues_CD.sumstats.info04_wide.tsv	all_pvalues_ADHD.info.0.8.maf.0.01.sumstats_wide.tsv	Liver_STARNET1	Liver_STARNET1	15476	5	0	0	[]
all_pvalues_CD.sumstats.info04_wide.tsv	all_pvalues_MDD.info.0.4.maf.0.01.sumstats_wide.tsv	Liver_STARNET1	Liver_STARNET1	15477	5	0	0	[]
all_pvalues_CD.sumstats.info04_wide.tsv	all_pvalues_ADHD.info.0.8.maf.0.01.sumstats_wide.tsv	Pancreas	Pancreas	6013	34	0	0	[]
all_pvalues_CD.sumstats.info04_wide.tsv	all_pvalues_MDD.info.0.4.maf.0.01.sumstats_wide.tsv	Pancreas	Pancreas	5886	34	0	0	[]
all_pvalues_CD.sumstats.info04_wide.tsv	all_pvalues_ADHD.info.0.8.maf.0.01.sumstats_wide.tsv	Small_Intestine_Terminal_Ileum	Small_Intestine_Terminal_Ileum	5461	41	3	0	[]
all_pvalues_CD.sumstats.info04_wide.tsv	all_pvalues_MDD.info.0.4.maf.0.01.sumstats_wide.tsv	Small_Intestine_Terminal_Ileum	Small_Intestine_Terminal_Ileum	5359	41	0	0	[]
all_pvalues_CD.sumstats.info04_wide.tsv	all_pvalues_ADHD.info.0.8.maf.0.01.sumstats_wide.tsv	Whole_Blood	Whole_Blood	6228	40	1	0	[]
all_pvalues_CD.sumstats.info04_wide.tsv	all_pvalues_MDD.info.0.4.maf.0.01.sumstats_wide.tsv	Whole_Blood	Whole_Blood	6130	40	2	0	[]
all_pvalues_CD.sumstats.info04_wide.tsv	all_pvalues_ADHD.info.0.8.maf.0.01.sumstats_wide.tsv	mono_eqtl	mono_eqtl	17066	0	0	0	[]
all_pvalues_CD.sumstats.info04_wide.tsv	all_pvalues_MDD.info.0.4.maf.0.01.sumstats_wide.tsv	mono_eqtl	mono_eqtl	17059	0	0	0	[]
all_pvalues_CD.sumstats.info04_wide.tsv	all_pvalues_ADHD.info.0.8.maf.0.01.sumstats_wide.tsv	neut_eqtl	neut_eqtl	12557	28	0	0	[]
all_pvalues_CD.sumstats.info04_wide.tsv	all_pvalues_MDD.info.0.4.maf.0.01.sumstats_wide.tsv	neut_eqtl	neut_eqtl	12452	28	1	0	[]
all_pvalues_CD.sumstats.info04_wide.tsv	all_pvalues_ADHD.info.0.8.maf.0.01.sumstats_wide.tsv	tcel_eqtl	tcel_eqtl	12586	24	1	0	[]
all_pvalues_CD.sumstats.info04_wide.tsv	all_pvalues_MDD.info.0.4.maf.0.01.sumstats_wide.tsv	tcel_eqtl	tcel_eqtl	12486	24	0	0	[]
all_pvalues_CD.sumstats.info04_wide.tsv	all_pvalues_ADHD.info.0.8.maf.0.01.sumstats_wide.tsv	GBJ	GBJ	1727	215	10	0	[]
all_pvalues_CD.sumstats.info04_wide.tsv	all_pvalues_MDD.info.0.4.maf.0.01.sumstats_wide.tsv	GBJ	GBJ	1632	215	9	0	[]
