# Supplementary material for: Cross-tissue transcriptome-wide association studies of 885,176 individuals and seven diseases of the gut-brain axis identify susceptibility genes shared between schizophrenia and inflammatory bowel disease
Source: Research Square preprint supplement (doi:10.21203/rs.3.rs-590423/v1), 2021-07-15
Supplement: Supplementary file 7 [file 969e290b9872f3745d8573ff.xlsx]

## Sheet: Supplementary Table 8
ICD-10	ICD-10	Name	Name	# Patients with disease A	# Patients with disease A and B	Relative Risk	P-value (fdr adjusted)
disease A	Disease B	Disease A	Disease B
K50	K51	Crohn disease [regional enteritis]	Ulcerative colitis	30376	8178	28646	0
K50	K83.0	Crohn disease [regional enteritis]	Cholangitis	30376	329	6404	4.24e-132
K50	F20	Crohn disease [regional enteritis]	Schizophrenia	30376	324	1150	1.52e-02
K50	F31	Crohn disease [regional enteritis]	Bipolar affective disorder	30376	273	1284	61.33e-04
K50	F32	Crohn disease [regional enteritis]	Depressive episode	30376	1942	1518	4.06e-65
K50	F90	Crohn disease [regional enteritis]	Hyperkinetic disorders	30376	280	1099	1.02e-01
K51	K50	Ulcerative colitis	Crohn disease [regional enteritis]	56802	8178	34899	0
K51	K83.0	Ulcerative colitis	Cholangitis	56802	727	6368	7.40e-290
K51	F20	Ulcerative colitis	Schizophrenia	56802	412	0.802	1
K51	F31	Ulcerative colitis	Bipolar affective disorder	56802	422	1021	4.44e-01
K51	F32	Ulcerative colitis	Depressive episode	56802	3250	1335	1.29e-54
K51	F90	Ulcerative colitis	Hyperkinetic disorders	56802	341	1017	4.90e-01
K83.0	K50	Cholangitis	Crohn disease [regional enteritis]	11447	329	5872	6.47e-124
K83.0	K51	Cholangitis	Ulcerative colitis	11447	727	6034	1.20e-282
K83.0	F20	Cholangitis	Schizophrenia	11447	76	0.963	7.44e-01
K83.0	F31	Cholangitis	Bipolar affective disorder	11447	82	1036	5.18e-01
K83.0	F32	Cholangitis	Depressive episode	11447	749	1422	4.85e-19
K83.0	F90	Cholangitis	Hyperkinetic disorders	11447	15	0.741	9.39e-01
F20	K50	Schizophrenia	Crohn disease [regional enteritis]	48952	324	1119	7.31e-02
F20	K51	Schizophrenia	Ulcerative colitis	48952	412	0.756	1
F20	K83.0	Schizophrenia	Cholangitis	48952	76	0.922	1
F20	F31	Schizophrenia	Bipolar affective disorder	48952	3208	10252	0
F20	F32	Schizophrenia	Depressive episode	48952	9388	4913	0
F20	F90	Schizophrenia	Hyperkinetic disorders	48952	2156	5344	0
F31	K50	Bipolar affective disorder	Crohn disease [regional enteritis]	36595	273	1286	1.65e-04
F31	K51	Bipolar affective disorder	Ulcerative colitis	36595	422	1029	4.67e-01
F31	K83.0	Bipolar affective disorder	Cholangitis	36595	82	1003	6.94e-01
F31	F20	Bipolar affective disorder	Schizophrenia	36595	3208	10637	0
F31	F32	Bipolar affective disorder	Depressive episode	36595	12932	8375	0
F31	F90	Bipolar affective disorder	Hyperkinetic disorders	36595	1885	10580	0
F32	K50	Depressive episode	Crohn disease [regional enteritis]	233505	1942	1566	1.44e-71
F32	K51	Depressive episode	Ulcerative colitis	233505	3250	1372	8.15e-63
F32	K83.0	Depressive episode	Cholangitis	233505	749	1567	1.34e-28
F32	F20	Depressive episode	Schizophrenia	233505	9388	5498	0
F32	F31	Depressive episode	Bipolar affective disorder	233505	12932	12182	0
F32	F90	Depressive episode	Hyperkinetic disorders	233505	7207	4430	0
F90	K50	Hyperkinetic disorders	Crohn disease [regional enteritis]	64942	280	0.910	1
F90	K51	Hyperkinetic disorders	Ulcerative colitis	64942	341	0.793	1
F90	K83.0	Hyperkinetic disorders	Cholangitis	64942	15	0.571	1
F90	F20	Hyperkinetic disorders	Schizophrenia	64942	2156	4501	0
F90	F31	Hyperkinetic disorders	Bipolar affective disorder	64942	1885	8240	0
F90	F32	Hyperkinetic disorders	Depressive episode	64942	7207	4238	0
